# Supplementary material for: A reaction of 1,2-diamines and aldehydes with silyl cyanide as cyanide pronucleophile to access 2-aminopyrazines and 2-aminoquinoxalines
Source: Royal Society of Chemistry journal article supplement (doi:10.1039/c6ra12028h), 2016-01-01

**A reaction of 1,2-diamines and aldehydes with silyl cyanide as cyanide pronucleophile to access 2-aminopyrazines and 2-aminoquinoxalines**

Sankar K. Guchhait,<sup>\*,a</sup> Garima Priyadarshani,<sup>a,†</sup> Nikhil M. Gulghane<sup>a,†</sup>

*<sup>a</sup>Department of Medicinal Chemistry, National Institute of Pharmaceutical Education and Research (NIPER), S. A. S. Nagar (Mohali) - 160062, Punjab, India, Fax: 91 (0)172 2214692;*

*Tel: 91 (0)172 2214683*

*Email: [skguchhait@niper.ac.in](mailto:skguchhait@niper.ac.in)*

## Contents

|                                                                                  |    |
|----------------------------------------------------------------------------------|----|
| Table S1: Properties of Bases Evaluated in the Optimization Study (Table 1)..... | 4  |
| 2D NMR of Compounds <b>6h</b> and <b>6i</b> (HMQC and HMBC) .....                | 6  |
| NMR Spectra of Compounds ( <b>6a-l</b> , <b>4a-p</b> ).....                      | 21 |
| 6a: <sup>1</sup> H NMR .....                                                     | 21 |
| 6a: <sup>13</sup> C NMR.....                                                     | 22 |
| 6b: <sup>1</sup> H NMR.....                                                      | 23 |
| 6b: <sup>13</sup> C NMR.....                                                     | 24 |
| 6c: <sup>1</sup> H NMR .....                                                     | 25 |
| 6c: <sup>13</sup> C NMR.....                                                     | 26 |
| 6d: <sup>1</sup> H NMR.....                                                      | 27 |
| 6d: <sup>13</sup> C NMR.....                                                     | 28 |
| 6e: <sup>1</sup> H NMR .....                                                     | 29 |
| 6e: <sup>13</sup> C NMR.....                                                     | 30 |
| 6f: <sup>1</sup> H NMR.....                                                      | 31 |
| 6f: <sup>13</sup> C NMR .....                                                    | 32 |
| 6g: <sup>1</sup> H NMR.....                                                      | 33 |
| 6g: <sup>13</sup> C NMR.....                                                     | 34 |
| 6h: <sup>1</sup> H NMR.....                                                      | 35 |
| 6h: <sup>13</sup> C NMR.....                                                     | 36 |
| 6i: <sup>1</sup> H NMR.....                                                      | 37 |
| 6i: <sup>13</sup> C NMR.....                                                     | 38 |
| 6j: <sup>1</sup> H NMR.....                                                      | 39 |

|                              |    |
|------------------------------|----|
| 6j: $^{13}\text{C}$ NMR..... | 40 |
| 6k: $^1\text{H}$ NMR.....    | 41 |
| 6k: $^{13}\text{C}$ NMR..... | 42 |
| 4a: $^1\text{H}$ NMR.....    | 43 |
| 4a: $^{13}\text{C}$ NMR..... | 44 |
| 4b: $^1\text{H}$ NMR.....    | 45 |
| 4b: $^{13}\text{C}$ NMR..... | 46 |
| 4c: $^1\text{H}$ NMR.....    | 47 |
| 4c: $^{13}\text{C}$ NMR..... | 48 |
| 4d: $^1\text{H}$ NMR.....    | 49 |
| 4d: $^{13}\text{C}$ NMR..... | 50 |
| 4e: $^1\text{H}$ NMR.....    | 51 |
| 4e: $^{13}\text{C}$ NMR..... | 52 |
| 4f: $^1\text{H}$ NMR.....    | 53 |
| 4f: $^{13}\text{C}$ NMR..... | 54 |
| 4g: $^1\text{H}$ NMR.....    | 55 |
| 4g: $^{13}\text{C}$ NMR..... | 56 |
| 4h: $^1\text{H}$ NMR.....    | 57 |
| 4h: $^{13}\text{C}$ NMR..... | 58 |
| 4i: $^1\text{H}$ NMR.....    | 59 |
| 4i: $^{13}\text{C}$ NMR..... | 60 |
| 4j: $^1\text{H}$ NMR.....    | 61 |
| 4j: $^{13}\text{C}$ NMR..... | 62 |
| 4k: $^1\text{H}$ NMR.....    | 63 |
| 4k: $^{13}\text{C}$ NMR..... | 64 |

|                              |    |
|------------------------------|----|
| 4l: $^1\text{H}$ NMR.....    | 65 |
| 4l: $^{13}\text{C}$ NMR..... | 66 |
| 4m: $^1\text{H}$ NMR.....    | 67 |
| 4m: $^{13}\text{C}$ NMR..... | 68 |
| 4n: $^1\text{H}$ NMR.....    | 69 |
| 4n: $^{13}\text{C}$ NMR..... | 70 |
| 4o: $^1\text{H}$ NMR.....    | 71 |
| 4o: $^{13}\text{C}$ NMR..... | 72 |
| 4p: $^1\text{H}$ NMR.....    | 73 |
| 4p: $^{13}\text{C}$ NMR..... | 74 |

**Table S1: Properties of Bases Evaluated in the Optimization Study (Table 1)**

| Base          | $pK_{HB}^+$        | Features                                      | Unique features of base                                                                                                                                                                                                                                                                                                                                                                                                                                                                                                                                           |
|---------------|--------------------|-----------------------------------------------|-------------------------------------------------------------------------------------------------------------------------------------------------------------------------------------------------------------------------------------------------------------------------------------------------------------------------------------------------------------------------------------------------------------------------------------------------------------------------------------------------------------------------------------------------------------------|
| DABCO         | 8.72 <sup>1</sup>  | Caged tertiary diamine                        |                                                                                                                                                                                                                                                                                                                                                                                                                                                                                                                                                                   |
| DBU           | 11.6 <sup>1</sup>  | Sterically hindered, tertiary amidine-diamine | Amidine-diamine functionality acting as basic/nucleophilic atom centers along with steric hindrance represents a particular type of functional motif and renders the compound as a practical reagent of choice for various reactions; <sup>5-7</sup> Compared to DABCO, it is relatively poor carbon-nucleophilic <sup>8</sup> and possesses higher carbon basicity. <sup>9</sup> These properties may favor the reagent for acting as a suitable silyl-targeting nucleophile and for promoting the present TMSCN-based reaction with dramatic rate-acceleration. |
| TMEDA         | 9.42 <sup>1</sup>  | Tertiary diamine                              |                                                                                                                                                                                                                                                                                                                                                                                                                                                                                                                                                                   |
| DIPEA         | 10.75 <sup>2</sup> | Tertiary amine                                |                                                                                                                                                                                                                                                                                                                                                                                                                                                                                                                                                                   |
| Triethylamine | 10.68 <sup>1</sup> | Tertiary amine                                |                                                                                                                                                                                                                                                                                                                                                                                                                                                                                                                                                                   |
| Piperazine    | 9.73 <sup>3</sup>  | Secondary amine                               |                                                                                                                                                                                                                                                                                                                                                                                                                                                                                                                                                                   |
| Piperidine    | 11.22 <sup>4</sup> | Secondary amine                               |                                                                                                                                                                                                                                                                                                                                                                                                                                                                                                                                                                   |

- (1) L. Cecchi, F. De Sarlo and F. Machetti, *Eur. J. Org. Chem.*, 2006, 4852.
- (2) D. D. Perrin, *Dissociation constants of organic acids and bases*; Butterworths: London, 1965. Supplement 1972.
- (3) F. Khalili, A. Henni and A. L. East, *J. Chem. Eng. Data*, 2009, **54**, 2914.
- (4) H. K. Jr. Hall, *J. Am. Chem. Soc.*, 1957, **79**, 5441.
- (5) H. Oediger, F. Moeller and K. Eiter, *Synthesis*, 1972, 591.
- (6) W. C. Shieh, S. Dell and O. Repic, *Org. Lett.*, 2001, **3**, 4279.
- (7) V. K. Aggarwal and A. Mereu, *Chem. Commun.*, 1999, 2311.
- (8) M. Baidya and H. Mayr, *Chem. Commun.*, 2008, 1792.
- (9) J. Hine and R. D. Weimar Jr, *J. Am. Chem. Soc.*, 1965, **87**, 3387.

**3-(4-Fluorophenyl)-6-methylpyrazin-2-amine (6h, 2D NMR, HMQC, HMBC):** The C3 carbon has been assigned by HMQC correlation between C3-H ( $\delta$ 7.75) and carbon at  $\delta$ 132.13.

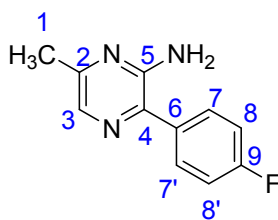

The methyl proton C1-H ( $\delta$  2.28) showed HMBC correlation with C2 ( $\delta$  150.21) and C3 ( $\delta$  132.1). The C3-H proton ( $\delta$  7.75) showed HMBC correlation with C2 ( $\delta$  150.21) and C4 ( $\delta$  135.78). The C7/C7'-H ( $\delta$  7.71-7.67) protons showed correlation with C8/C8' ( $\delta$  130.69-130.60, d), C6 ( $\delta$  134.50-134.47, d), C4 ( $\delta$  135.78) and C9 ( $\delta$  163.57-161.13, d). The C8/C8'-H ( $\delta$  7.30-7.25) protons showed correlation with C7/C7' ( $\delta$  115.97-115.76, d), C6 ( $\delta$  134.50-134.47, d), C4 ( $\delta$  135.78) and C9 ( $\delta$  163.57-161.13, d).

**3-(4-Methoxyphenyl)-6-methylpyrazin-2-amine (6i, 2D NMR, HMQC, HMBC):** The C3 carbon has been assigned by HMQC correlation between C3-H ( $\delta$ 7.88) and carbon at  $\delta$ 133.77.

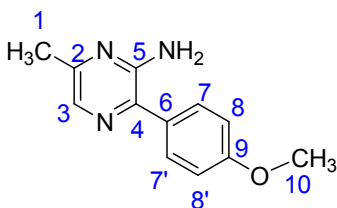

The methyl proton C1-H ( $\delta$  2.39) showed HMBC correlation with C2 ( $\delta$  149.48) and C3 ( $\delta$  133.77). The C3-H proton ( $\delta$  7.88) showed HMBC correlation with C2 ( $\delta$  149.48) and C4 ( $\delta$  137.63). The C7/C7'-H ( $\delta$  7.65-7.62) protons showed correlation with C8/C8' ( $\delta$  129.42), C6 ( $\delta$  129.76), C4 ( $\delta$  137.63) and C9 ( $\delta$  159.95). The C8/C8'-H ( $\delta$  7.01-6.98) protons showed correlation with C7/C7' ( $\delta$  114.38), C6 ( $\delta$  129.76), C4 ( $\delta$  137.63) and C9 ( $\delta$  159.95). The methoxy protons C10-H ( $\delta$ 3.85) showed correlation with C9 ( $\delta$ 159.95).

## 2D NMR of Compounds 6h and 6i (HMQC and HMBC)

### 6h: HMQC

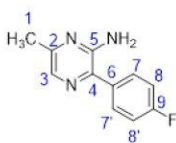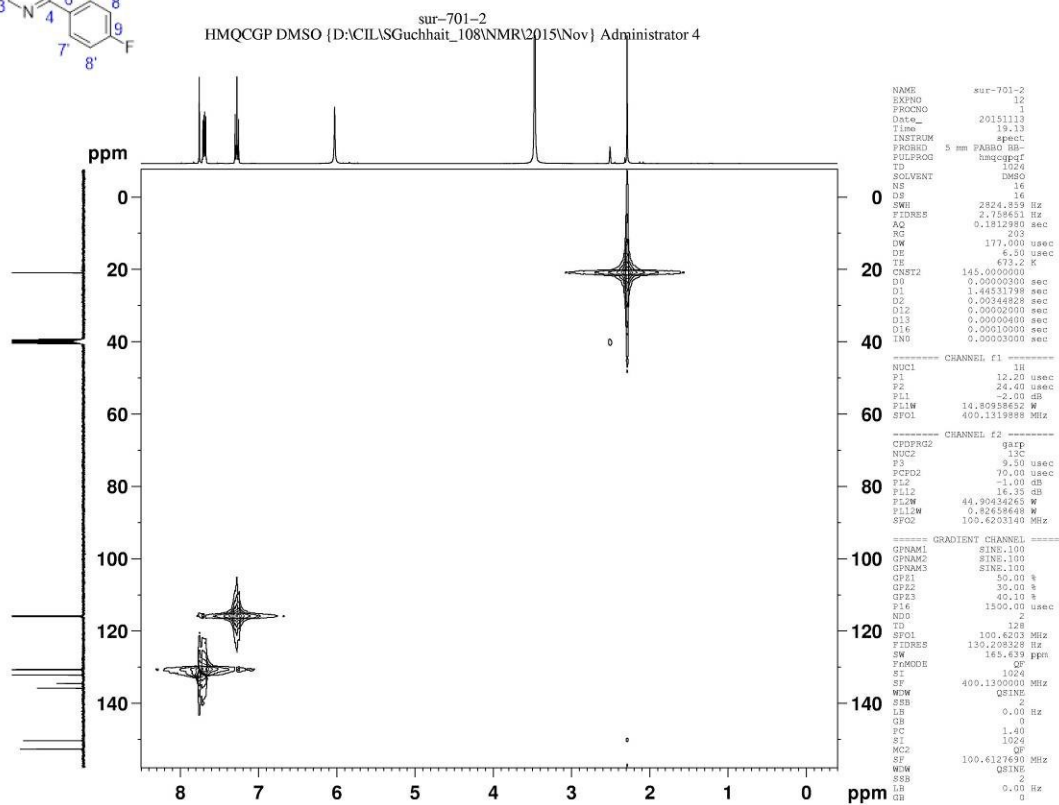

6h: HMQC (Expansion 1)

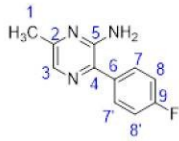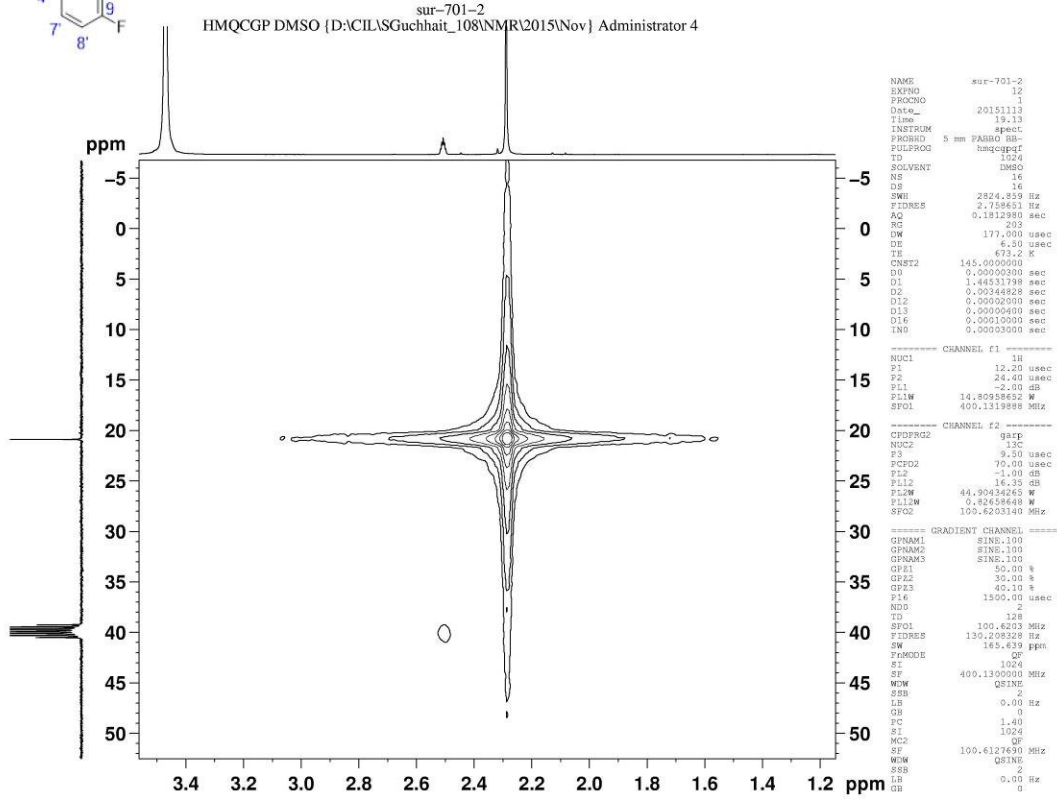



# 6h: HMQC (Expansion 2)

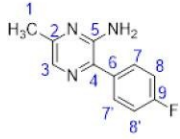

sur-701-2  
 HMQCGP DMSO [D:\CILASGuchhait\_108\NMR\2015\Nov} Administrator 4

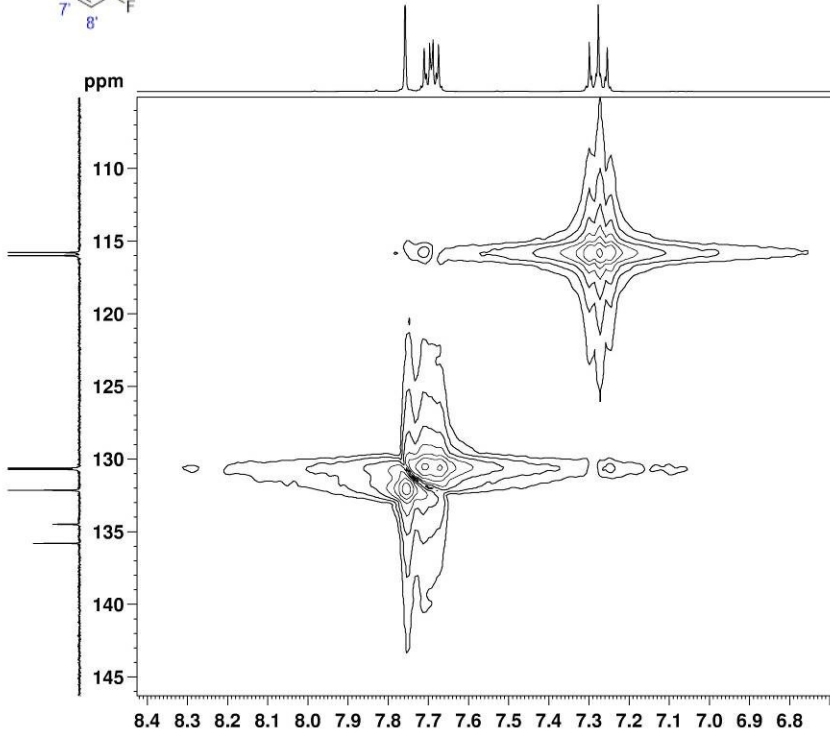

```

NAME sur-701-2
EXPNO 12
PROCNO 1
Date_ 20151113
Time 19:13
INSTRUM spect
PROBHD 5 mm F4BBO BB-
PULPROG hmqcpgpf
TD 1024
SOLVENT DMSO
NS 16
DS 16
SWH 2824.859 Hz
FIDRES 2.758651 Hz
AQ 0.1812980 sec
RG 203
AQ 0.1812980 sec
DE 6.30 usec
TE 303.2 K
CNST2 145.000000
D0 0.0000000 sec
D1 1.4833798 sec
D2 0.0034828 sec
D12 0.0000000 sec
D13 0.0000000 sec
D16 0.0001000 sec
TD 0.0000000 sec

===== CHANNEL f1 =====
NUC1 1H
P1 12.20 usec
P2 24.40 usec
PL1 -2.00 dB
PL2 -2.00 dB
PL1M 14.80938652 W
SFO1 400.1319898 MHz

===== CHANNEL f2 =====
CFOFREQ2 984P
NUC2 13C
P3 9.30 usec
PCPD2 70.00 usec
PL2 -1.00 dB
PL12 16.35 dB
PL1M 44.39434263 W
SFO2 100.6203140 MHz

===== GRADIENT CHANNEL =====
GPNAM1 SINE.100
GPNAM2 SINE.100
GPNAM3 SINE.100
QP1 50.00 %
QP22 30.00 %
QP13 40.10 %
P16 1500.00 usec
NDD 2
TD 128
SFO1 100.6203 MHz
FIDRES 130.200209 Hz
SW 165.639 ppm
F4MODE 0F
SI 1024
SF 400.1300000 MHz
WDW QSINE
SSB 0
LB 0.00 Hz
GB 0
PC 1.40
SI 1024
MC2 0F
SF 100.6127630 MHz
WDW QSINE
SSB 0
LB 0.00 Hz
GB 0
  
```

# 6h: HMBC

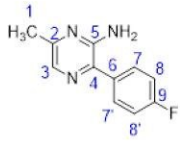

sur-701-2  
 HMBCGP DMSO [D:\CILASGuchhait\_108\NMR\2015\Nov\ Administrator 4

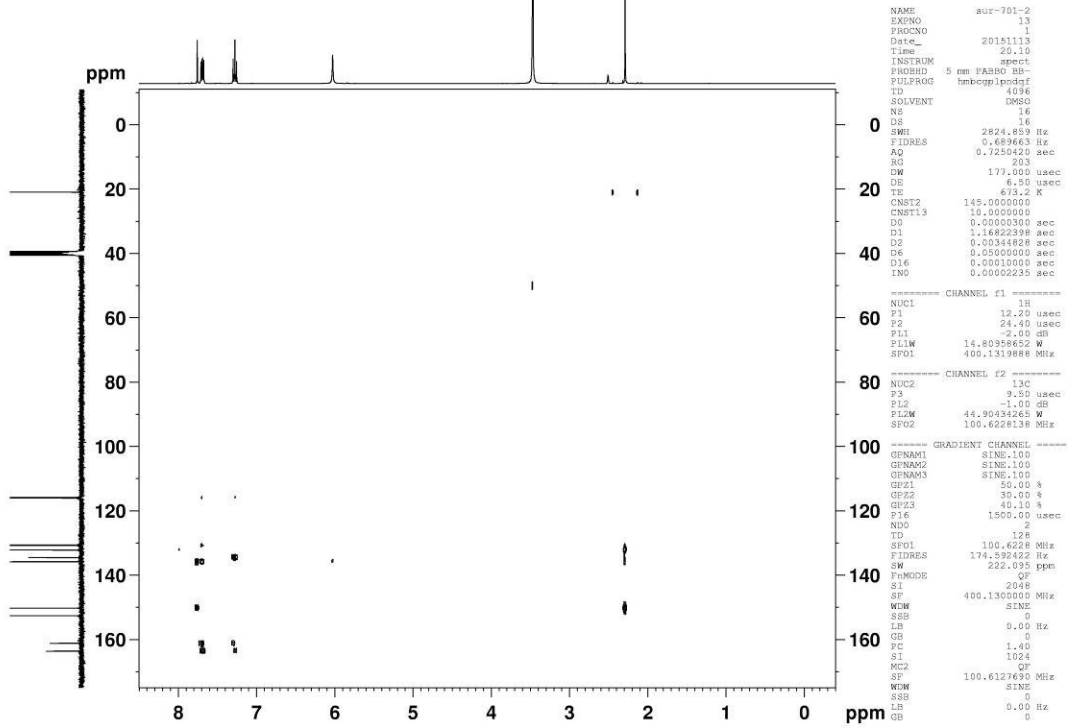

```

NAME sur-701-2
EXPNO 13
PROCNO 1
Date_ 20151113
Time 20.18
INSTRUM spect
PROBHD 5 mm F400 H
PULPROG hmcpgp100d4f
TD 4096
SOLVENT DMSO
NS 16
DS 16
SWH 2824.839 Hz
FIDRES 0.689663 Hz
AQ 0.7250420 sec
RG 303
DW 177.000 usec
DE 6.30 usec
TE 293.2 K
CNST2 145.000000
CNST3 10.000000
DO 0.0000300 sec
D1 1.16823398 sec
D2 0.00344826 sec
D6 0.05000000 sec
D16 0.00010000 sec
IND 0.00022325 sec

----- CHANNEL f1 -----
NUC1 1H
P1 12.20 usec
P2 24.40 usec
PL1 -2.00 dB
PLW 14.80358652 W
SFO1 400.1319986 MHz

----- CHANNEL f2 -----
NUC2 13C
P3 9.50 usec
P4 1.00 dB
PLW 44.80434265 W
SFO2 100.6228138 MHz

----- GRADIENT CHANNEL -----
GFNAM1 SINE,1.00
GFNAM2 SINE,1.00
GFNAM3 SINE,1.00
GFZ1 50.00 %
GFZ2 30.00 %
GFZ3 40.10 %
P16 1500.00 usec
NDO 2
TD 128
SFO1 100.6228 MHz
FIDRES 174.592422 Hz
SW 222.035 ppm
FMODE QF
SI 2048
SF 400.1300000 MHz
SSB 0
LB 0.00 Hz
GB 0
PC 1.40
SI 1024
MC2 QF
SF 100.6127630 MHz
SSB 0
LB 0.00 Hz
GB 0
  
```

# 6h: HMBC (Expansion 1)

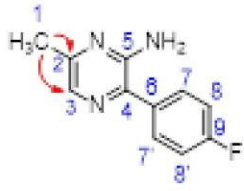

sur-701-2  
 HMBCGP DMSO [D:\CILASGuchhait\_108\NMR\2015\Nov\ Administrator 4

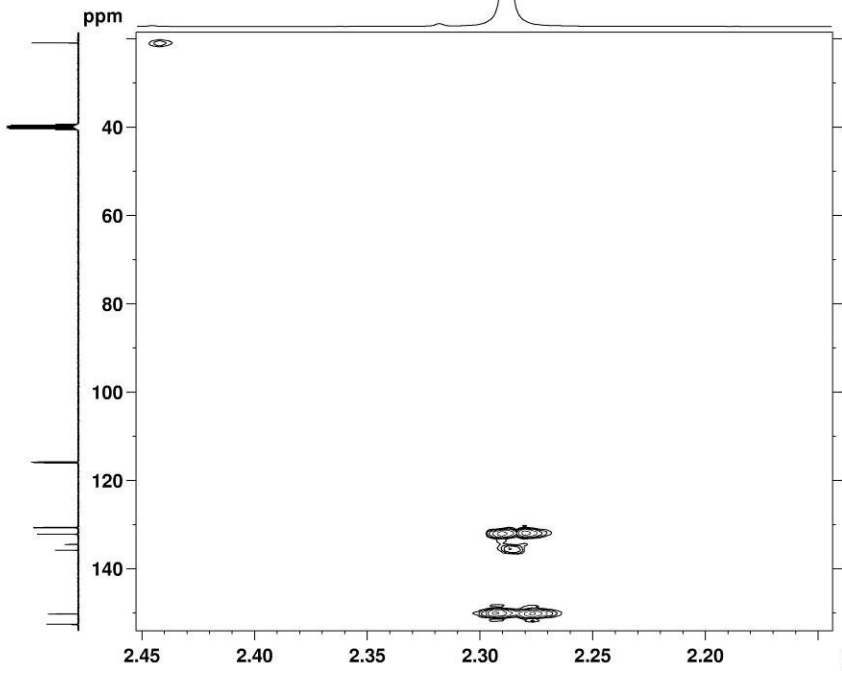

```

NAME sur-701-2
EXPNO 13
PROCNO 1
Date_ 20151113
Time 22.18
INSTRUM spect
PROBHD 5 mm F400 H
PULPROG hmcpgp1p0q4f
TD 4096
SOLVENT DMSO
NS 16
DS 16
SWH 2824.839 Hz
FIDRES 0.689663 Hz
AQ 0.7250420 sec
RG 203
DW 177.000 usec
DE 6.30 usec
TE 293.2 K
CNST2 145.000000
CNST13 10.000000
D0 0.0000300 sec
D1 1.16822398 sec
D2 0.00344828 sec
D6 0.05000000 sec
D16 0.00010000 sec
IND 0.0000232 sec

----- CHANNEL f1 -----
NUC1 1H
P1 12.20 usec
P2 24.40 usec
PL1 -2.00 dB
PL1W 14.80358652 W
SFO1 400.1319988 MHz

----- CHANNEL f2 -----
NUC2 13C
P3 9.50 usec
PL2 1.00 dB
PL2W 44.80434265 W
SFO2 100.6228138 MHz

----- GRADIENT CHANNEL -----
GFNAM1 SINE.100
GFNAM2 SINE.100
GFNAM3 SINE.100
GFZ1 50.00 %
GFZ2 30.00 %
GFZ3 40.10 %
P16 1500.00 usec
NDO 2
TD 128
SFO1 100.6228 MHz
FIDRES 174.592422 Hz
SW 222.035 ppm
FMODE QF
SI 2048
SF 400.1300000 MHz
WDM SINE
SSB 0
LB 0.00 Hz
GB 0
PC 1.40
SI 1024
MC2 QF
SF 100.6127630 MHz
WDM SINE
SSB 0
LB 0.00 Hz
GB 0
  
```

## 6h: HMBC (Expansion 2)

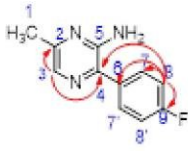

sur-701-2  
 HMBCGP DMSO [D:\CILASGuchhait\_108\NMR\2015\Nov} Administrator 4

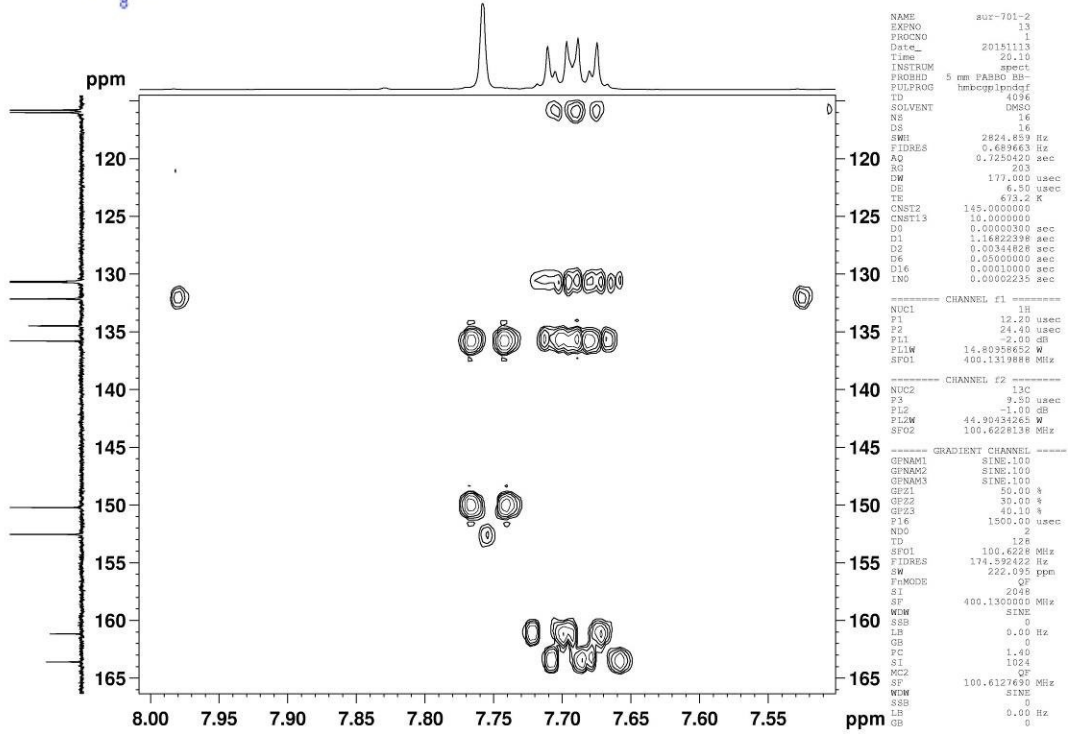

# 6h: HMBC (Expansion 3)

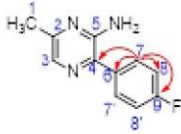

sur-701-2  
 HMBCGP DMSO {D:\CILASGuchhait\_108\NMR\2015\Nov} Administrator 4

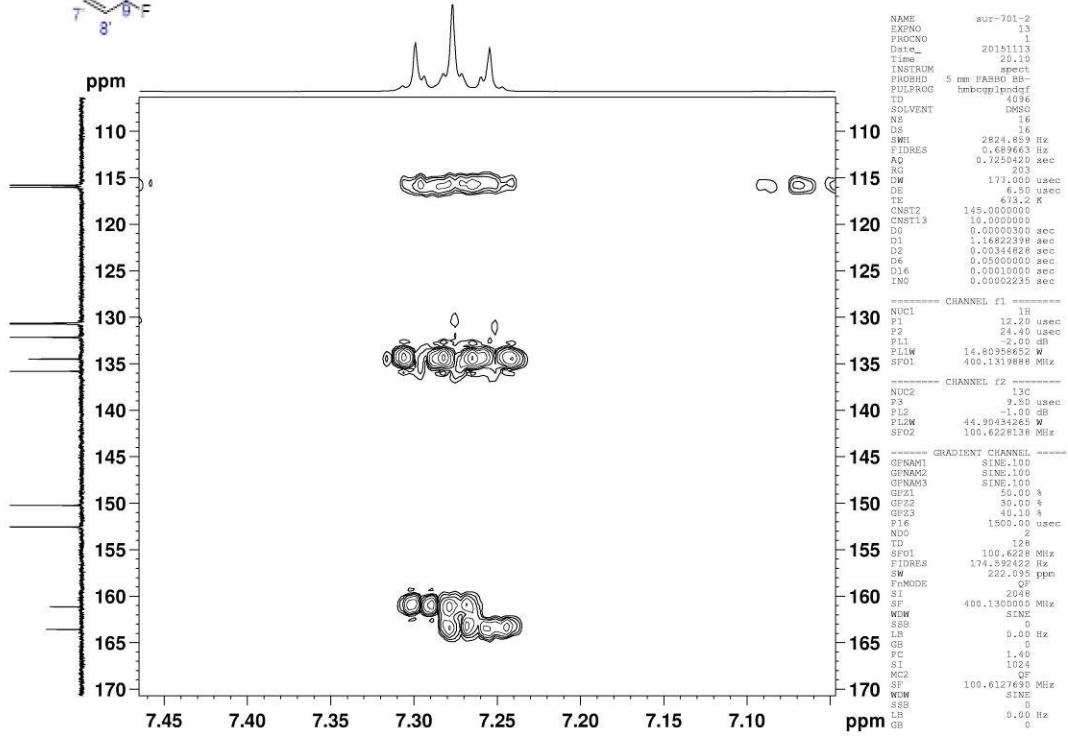

# 6i: HMQC

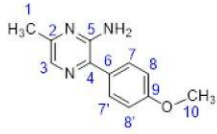

sur-707  
 HMQCGP CDCl3 {D:\CILASGuchhait\_108\NMR\2015\Nov\ Administrator 1

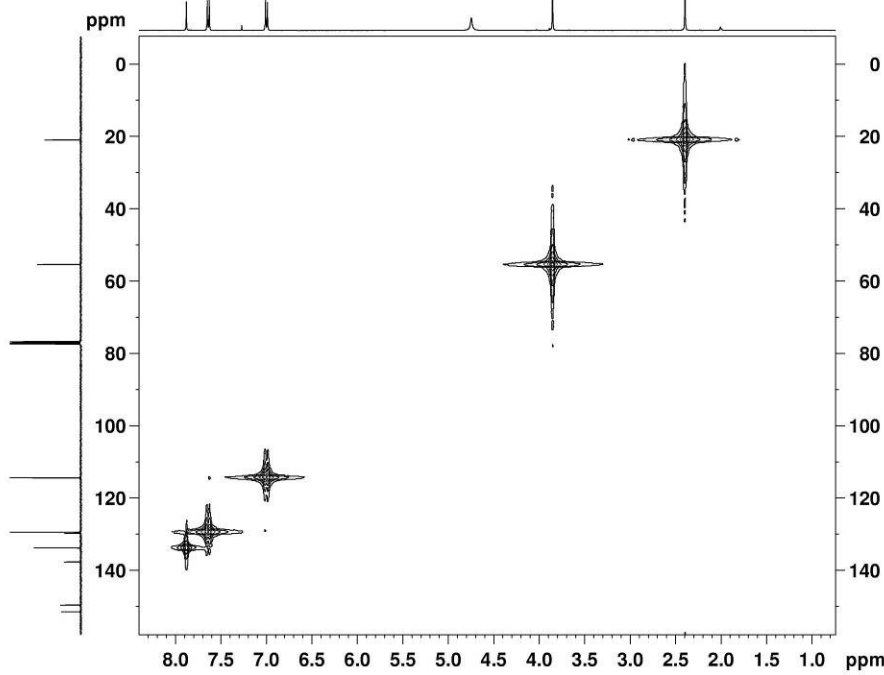

```

NAME sur-707
EXPNO 12
PROCNO 1
Date_ 20151113
Time 16:33
INSTRUM spect
PROBHD 5 mm PABBO BB-
PULPROG hmqcpgpf
TD 1024
SOLVENT CDCl3
NS 16
DS 16
SWH 3067.485 Hz
FIDRES 2.995590 Hz
AQ 0.1849620 sec
RG 203
RW 163.000 usec
DE 6.30 usec
TE 300.2 K
CNST2 145.0000000
D0 0.0000000 sec
D1 1.48345397 sec
D2 0.00344928 sec
D12 0.0000000 sec
D13 0.0000000 sec
D16 0.0001000 sec
TD 0.0000000 sec

===== CHANNEL f1 =====
NUC1 13C
P1 12.20 usec
P2 24.00 usec
PL1 -2.00 dB
PL2 14.80938652 W
SFO1 400.1318321 MHz

===== CHANNEL f2 =====
CPDPRG2 gddp
NUC2 13C
P3 9.30 usec
PCPD2 70.00 usec
PL3 -1.00 dB
PL12 16.35 dB
PL13 44.30934263 W
PL14 0.82658648 W
SFO2 100.6203340 MHz

===== GRADIENT CHANNEL =====
GPNAM1 SINE.100
GPNAM2 SINE.100
GPNAM3 SINE.100
QP1 50.00 s
QP2 30.00 s
QP3 40.10 s
P16 1500.00 usec
NDD 2
TD 128
SFO1 100.6203 MHz
FIDRES 130.200269 Hz
SW 165.639 ppm
FAMODE 0F
SI 1024
SF 400.1300048 MHz
WDW QSINE
SSB 2
LB 0.00 Hz
GB 0
PC 1.40
SI 1024
MC2 0F
SF 100.6127630 MHz
WDW QSINE
SSB 2
LB 0.00 Hz
GB 0
  
```

# 6i: HMQC (Expansion 1)

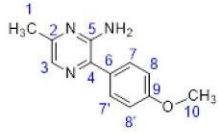

sur-707  
 HMQCGP CDCl3 {D:\CILAS\Guchhait\_108\NMR\2015\Nov\ Administrator 1

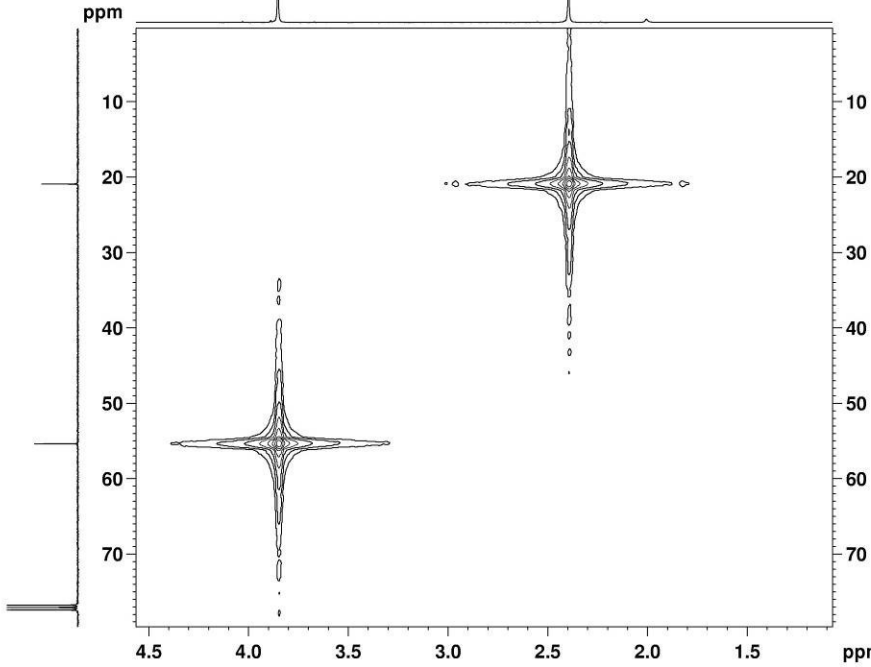

```

NAME sur-707
EXPNO 1
PROCNO 1
Date_ 20151113
Time 16:33
INSTRUM spect
PROBHD 5 mm PABBO BB-
PULPROG hmqcgpgf
TD 1024
SOLVENT CDCl3
NS 16
DS 16
SWH 3067.485 Hz
FIDRES 2.995590 Hz
AQ 0.1889620 sec
RG 203
RW 163.000 usec
DE 6.30 usec
TE 300.2 K
CNST2 145.000000 sec
D0 0.0000000 sec
D1 1.48845397 sec
D2 0.00344928 sec
D12 0.0000000 sec
D13 0.0000000 sec
D16 0.0001000 sec
TD0 0.0000000 sec

===== CHANNEL f1 =====
NUC1 1H
P1 12.20 usec
P2 24.40 usec
PL1 -2.00 dB
PL2 14.8093862 W
SFO1 400.1318321 MHz

===== CHANNEL f2 =====
CFOFPG2 gssp
NUC2 13C
P3 9.30 usec
PCPO2 70.00 usec
PL3 -1.00 dB
PL12 16.35 dB
PL2W 44.30934263 W
PL12W 0.82658648 W
SFO2 100.6203440 MHz

===== GRADIENT CHANNEL =====
GPNAM1 SINE.100
GPNAM2 SINE.100
GPNAM3 SINE.100
QP1 80.00 s
QP2 30.00 s
QP13 401.10 s
P16 1500.00 usec
NDD 2
TD 128
SFO1 100.6203 MHz
FIDRES 130.200269 Hz
SW 165.639 ppm
FPMODE SF
SF 1024
MCHW 400.1300048 MHz
SSB 0
LB 0.00 Hz
GB 0
PC 1.40
SI 1024
MC2 0F
SF 100.6127630 MHz
MCHW 0F
SSB 2
LB 0.00 Hz
GB 0
  
```

# 6i: HMQC (Expansion 2)

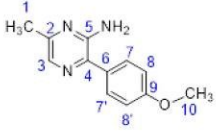

sur-707  
 HMQCGP CDCl3 {D:\CILASGuchhait\_108\NMR\2015\Nov} Administrator 1

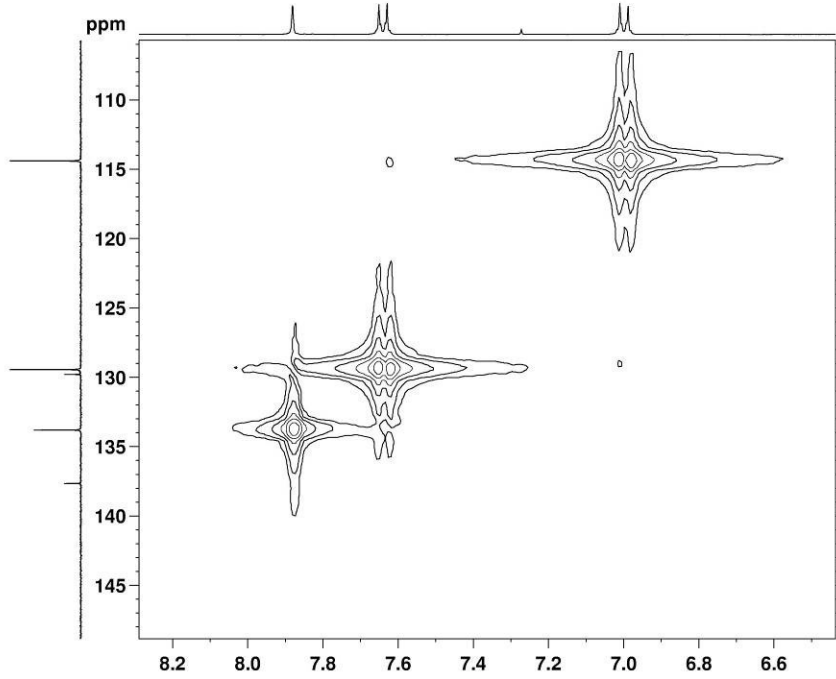

```

NAME sur-707
EXPNO 12
PROCNO 1
Date_ 20151113
Time 16:33
INSTRUM spect
PROBHD 5 mm PABBO BB-
PULPROG hmqcgpgf
TD 1024
SOLVENT CDCl3
NS 16
DS 16
SWH 3067.485 Hz
FIDRES 2.995590 Hz
AQ 0.1849620 sec
RG 203
FW 163.000 usec
DE 6.30 usec
TE 300.2 K
CNST2 145.000000
D0 0.0000000 sec
D1 1.48345397 sec
D2 0.00344828 sec
D12 0.0000000 sec
D13 0.0000000 sec
D16 0.0001000 sec
TD 0.0000000 sec

===== CHANNEL f1 =====
NUC1 15N
P1 12.20 usec
P2 24.40 usec
PL1 -2.00 dB
PL12 14.80938652 W
SFO1 400.1318321 MHz

===== CHANNEL f2 =====
CPDPRG2 gddp
NUC2 13C
P3 9.30 usec
PCPD2 70.00 usec
PL2 -1.00 dB
PL12 16.35 dB
PL12W 44.39434263 W
PL12M 0.82658648 W
SFO2 100.6203340 MHz

===== GRADIENT CHANNEL =====
GPNAM1 SINE.100
GPNAM2 SINE.100
GPNAM3 SINE.100
QP1 50.00 s
QP2 30.00 s
QP3 40.10 s
P16 1500.00 usec
NDD 2
TD 128
SFO1 100.6203 MHz
FIDRES 130.200269 Hz
SW 165.639 ppm
FPMODE QF
SI 1024
SF 400.1300048 MHz
WDW QSINE
SSB 2
LB 0.00 Hz
GB 0
PC 1.40
SI 1024
MC2 QF
SF 100.6127630 MHz
WDW QSINE
SSB 2
LB 0.00 Hz
GB 0
  
```



# 6i: HMBC

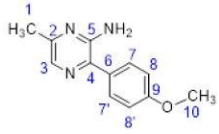

sur-707  
 HMBCGP CDCl3 {D:\CILASGuchhait\_108\NMR\2015\Nov\ Administrator 1

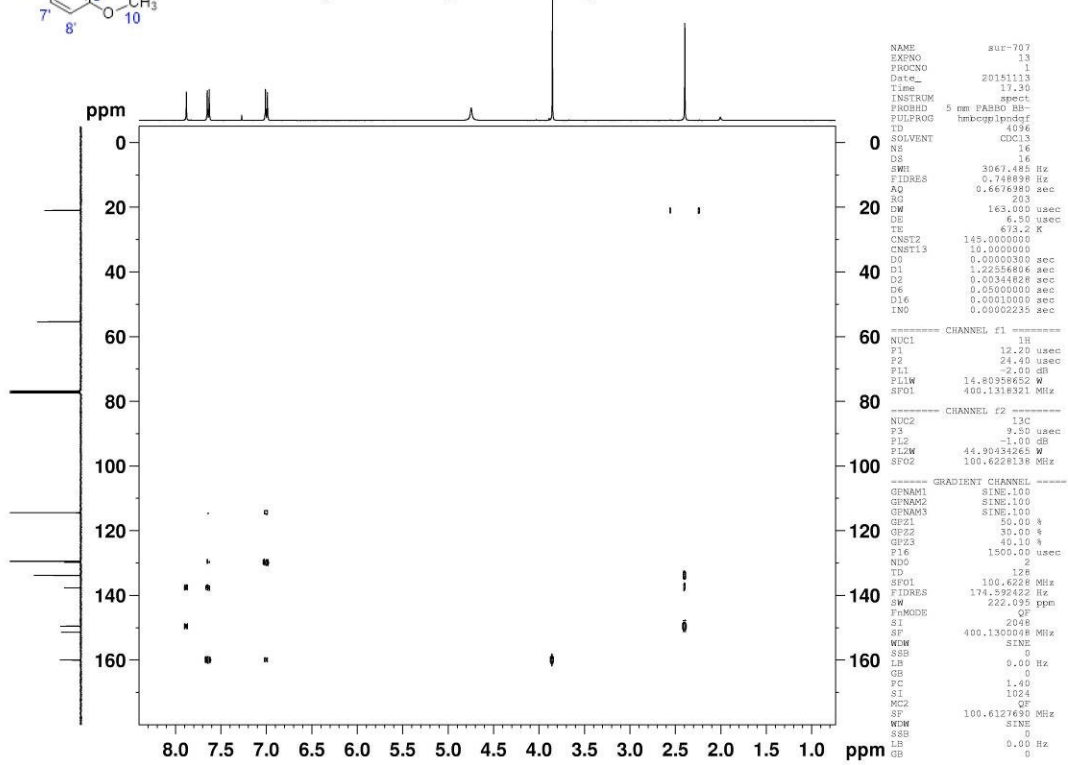

# 6i: HMBC (Expansion 1)

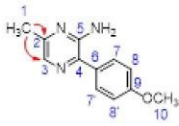

sur-707  
 HMBCGP CDCl3 [D:\CILAS\Guchhait\_108\NMR\2015\Nov\ Administrator 1

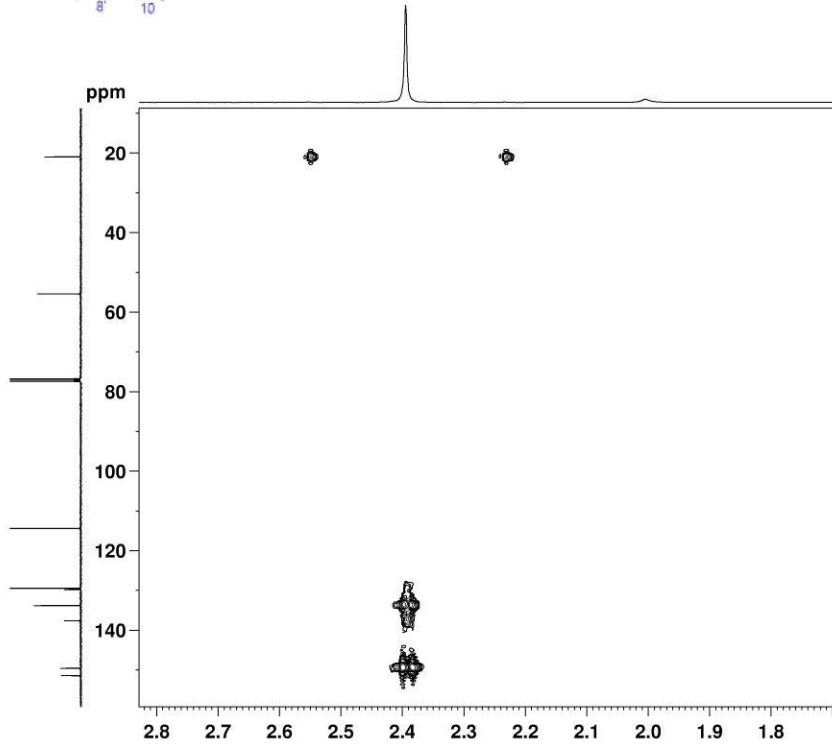

```

NAME sur-707
EXPNO 13
PROCNO 1
Date_ 20151113
Time 17.36
INSTRUM spect
PROBHD 5 mm F400 BBI
PULPROG hmcpr1p03zf
TD 4096
SOLVENT cdcl3
NS 16
DS 16
SWH 3067.485 Hz
FIDRES 0.748898 Hz
AQ 0.6676980 sec
RG 203
DW 163.000 usec
DE 6.50 usec
TE 293.2 K
CNST2 145.000000
CNST3 10.000000
D0 0.0000300 sec
D1 1.2256806 sec
D2 0.0034428 sec
D6 0.0500000 sec
D16 0.0001000 sec
IND 0.0002232 sec

----- CHANNEL f1 -----
NUC1 1H
P1 12.20 usec
P2 24.40 usec
PL1 -2.00 dB
PL1W 14.80358652 W
SFO1 400.1318321 MHz

----- CHANNEL f2 -----
NUC2 13C
P3 9.50 usec
PL2 -1.00 dB
PL2W 44.80434265 W
SFO2 100.6228138 MHz

----- GRADIENT CHANNEL -----
GFNAM1 SINE.100
GFNAM2 SINE.100
GFNAM3 SINE.100
GEZ1 50.00 %
GEZ2 30.00 %
GEZ3 40.10 %
P16 1500.00 usec
NDO 2
TD 128
SFO1 100.6228 MHz
FIDRES 174.592422 Hz
SW 222.035 ppm
FMODE QF
SI 2048
SF 400.1300008 MHz
WDM SINE
SSB 0
LB 0.00 Hz
GB 0
PC 1.40
SI 1024
MC2 QF
SF 100.6127630 MHz
WDM SINE
SSB 0
LB 0.00 Hz
GB 0
  
```

## 6i: HMBC (Expansion 2)

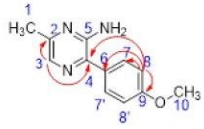

sur-707  
 HMBCGP CDCl3 [D:\CILASGuchhait\_108\NMR\2015\Nov} Administrator 1

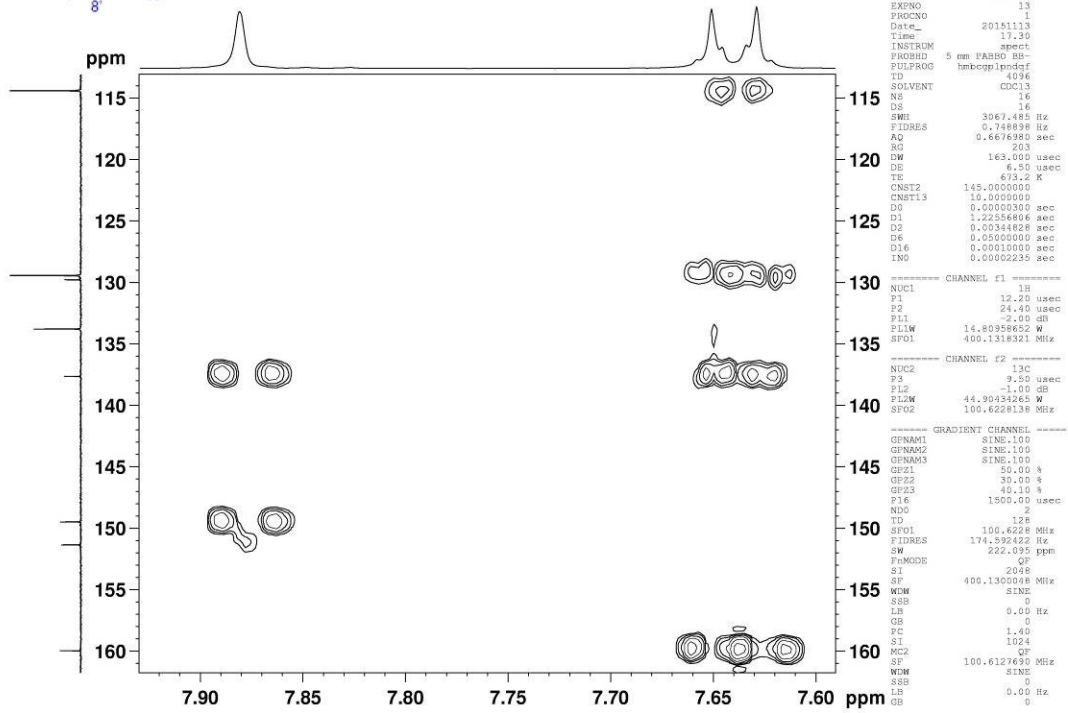

# 6i: HMBC (Expansion 3)

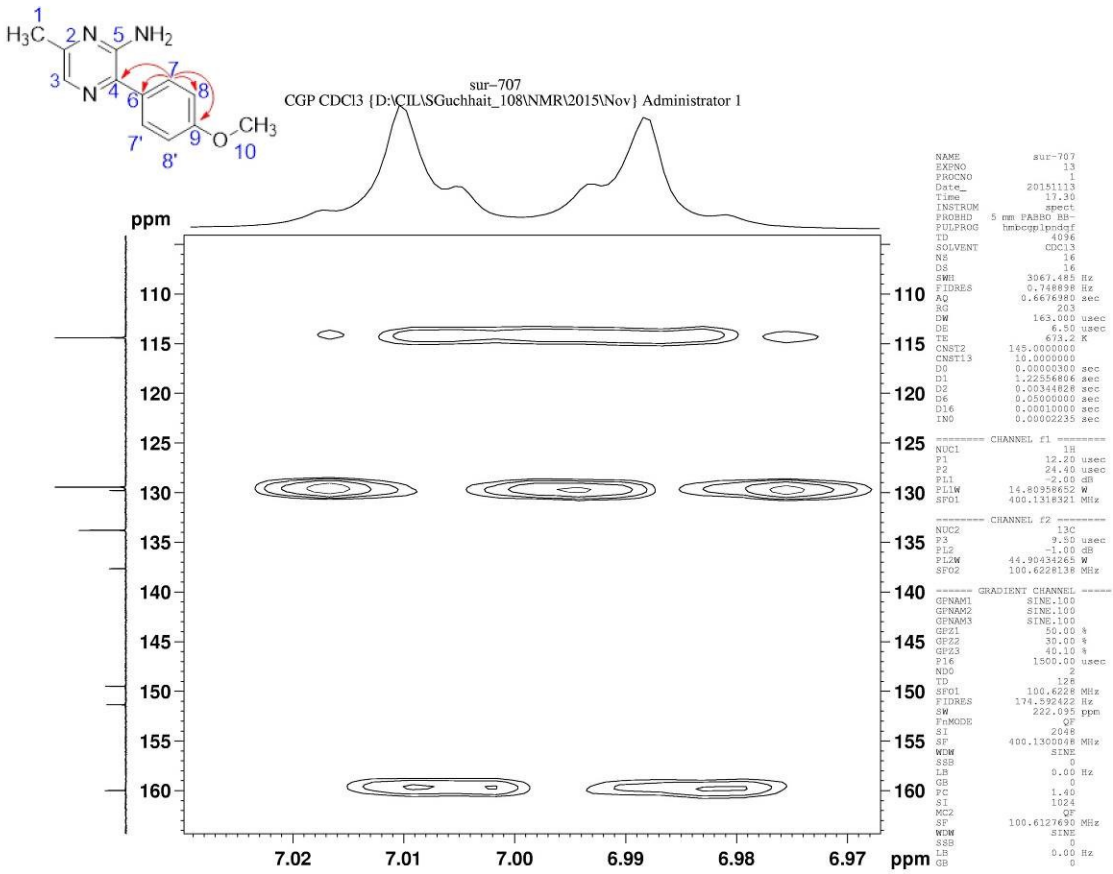

# 6i: HMBC (Expansion 4)

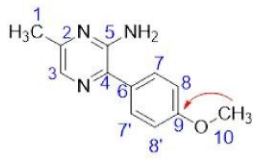

sur-707  
 HMBCGP CDCl3 [D:\CILASGuchhait\_108\NMR\2015\Nov\ Administrator 1

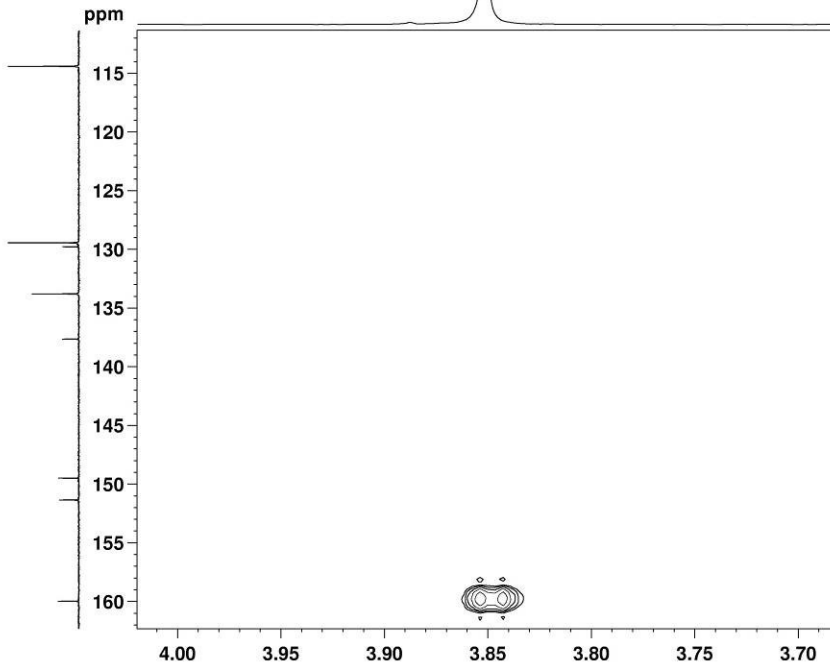

```

NAME sur-707
EXPNO 13
PROCNO 1
Date_ 20151113
Time 17.36
INSTRUM spect
PROBHD 5 mm F400 1H-
PULPROG hmcpgp1p0q4f
TD 4096
SOLVENT CDCl3
NS 16
DS 16
SWH 3067.485 Hz
FIDRES 0.748898 Hz
AQ 0.6676980 sec
RG 203
DW 163.000 usec
DE 6.30 usec
TE 293.2 K
CNST2 145.000000
CNST3 10.000000
D0 0.0000300 sec
D1 1.2256806 sec
D2 0.0034428 sec
D6 0.0500000 sec
D16 0.0001000 sec
IND 0.0002232 sec

----- CHANNEL f1 -----
NUC1 1H
P1 12.20 usec
P2 24.40 usec
P11 -2.00 dB
PL1W 14.80358652 W
SFO1 400.1318321 MHz

----- CHANNEL f2 -----
NUC2 13C
P3 9.50 usec
P12 -1.00 dB
PL2W 44.80434265 W
SFO2 100.6228138 MHz

----- GRADIENT CHANNEL -----
GFNAM1 SINE,1.00
GFNAM2 SINE,1.00
GFNAM3 SINE,1.00
GFZ1 50.00 %
GFZ2 30.00 %
GFZ3 40.10 %
P16 1500.00 usec
NDO 2
TD 128
SFO1 100.6228 MHz
FIDRES 174.592422 Hz
SW 222.035 ppm
FMODE QF
SI 2048
SF 400.1300000 MHz
WCM SINE
SSB 0
LB 0.00 Hz
GB 0
PC 1.40
SI 1024
MC2 QF
SF 100.6127630 MHz
WCM SINE
SSB 0
LB 0.00 Hz
GB 0
  
```

# NMR Spectra of Compounds 6a-l, 4a-p

## 6a: <sup>1</sup>H NMR

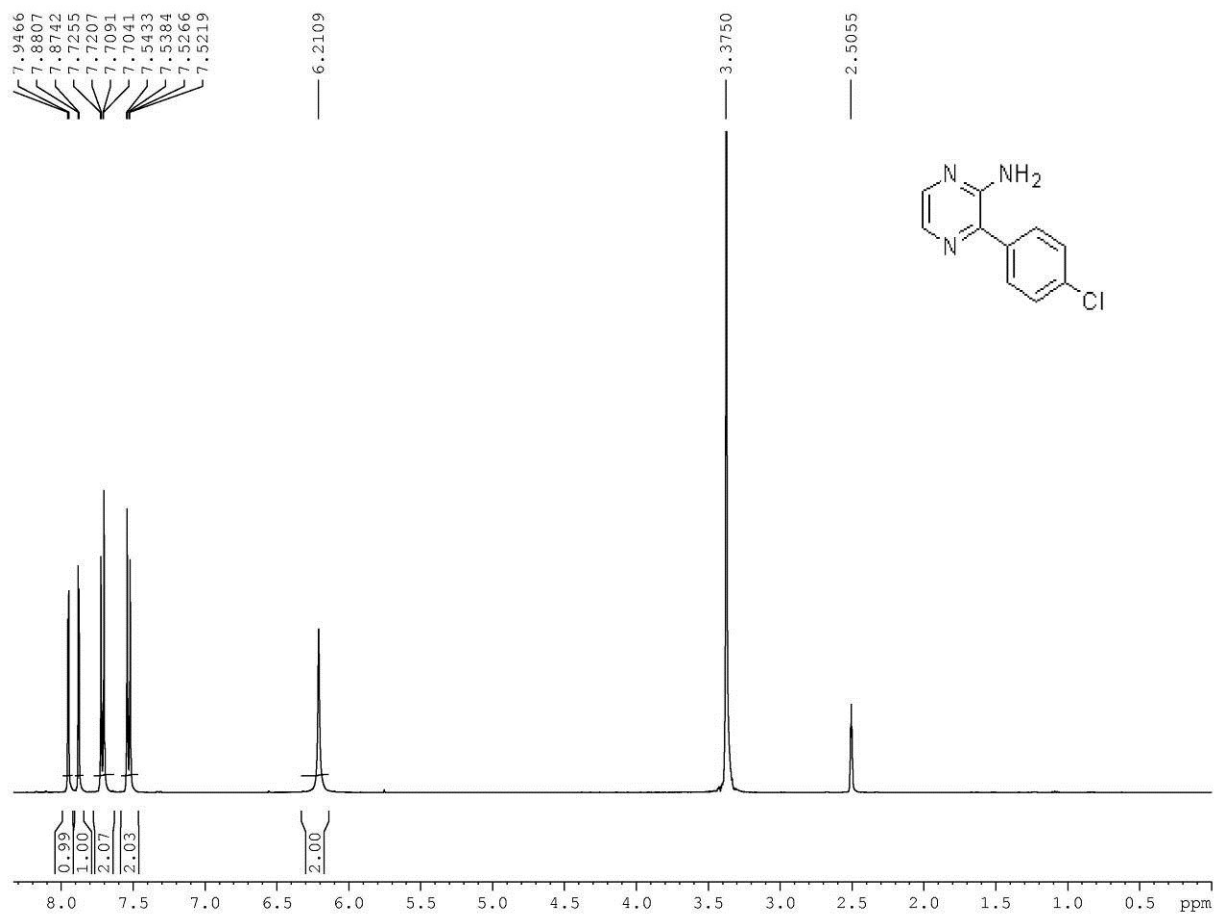

6a:  $^{13}\text{C}$  NMR

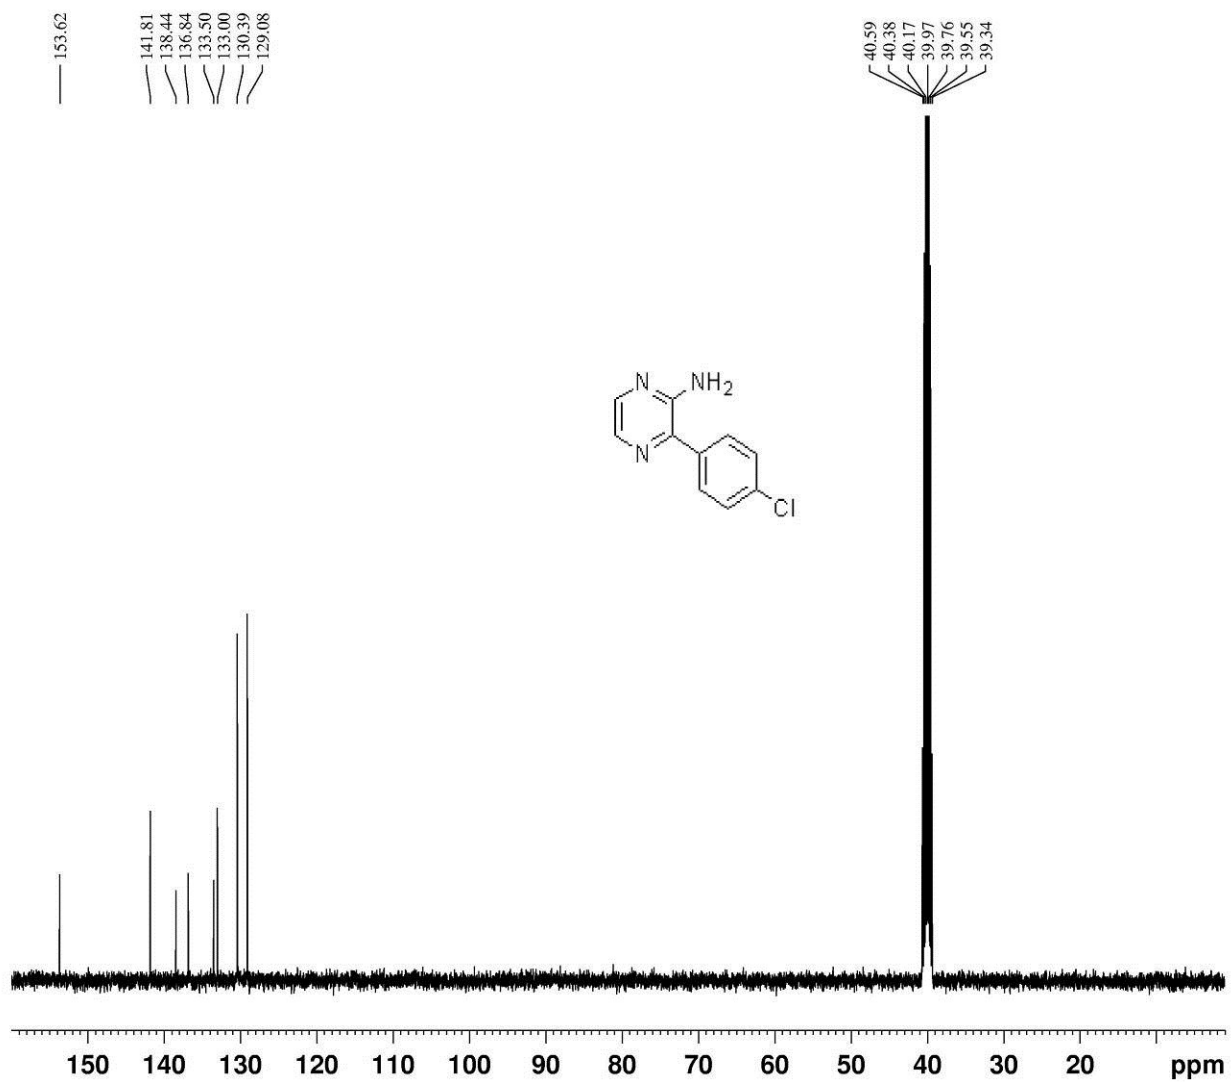

# 6b: <sup>1</sup>H NMR

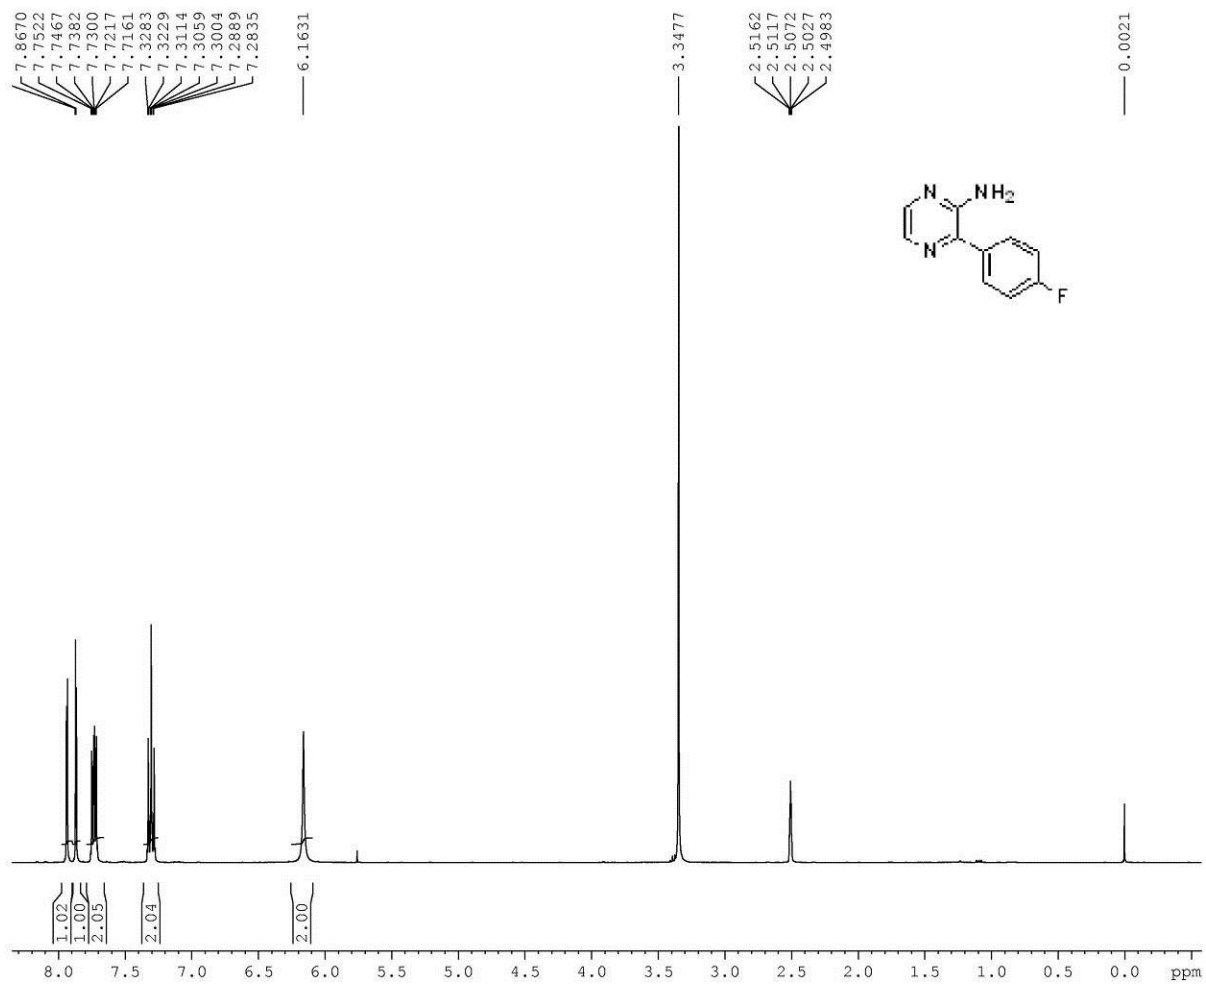



6b: <sup>13</sup>C NMR

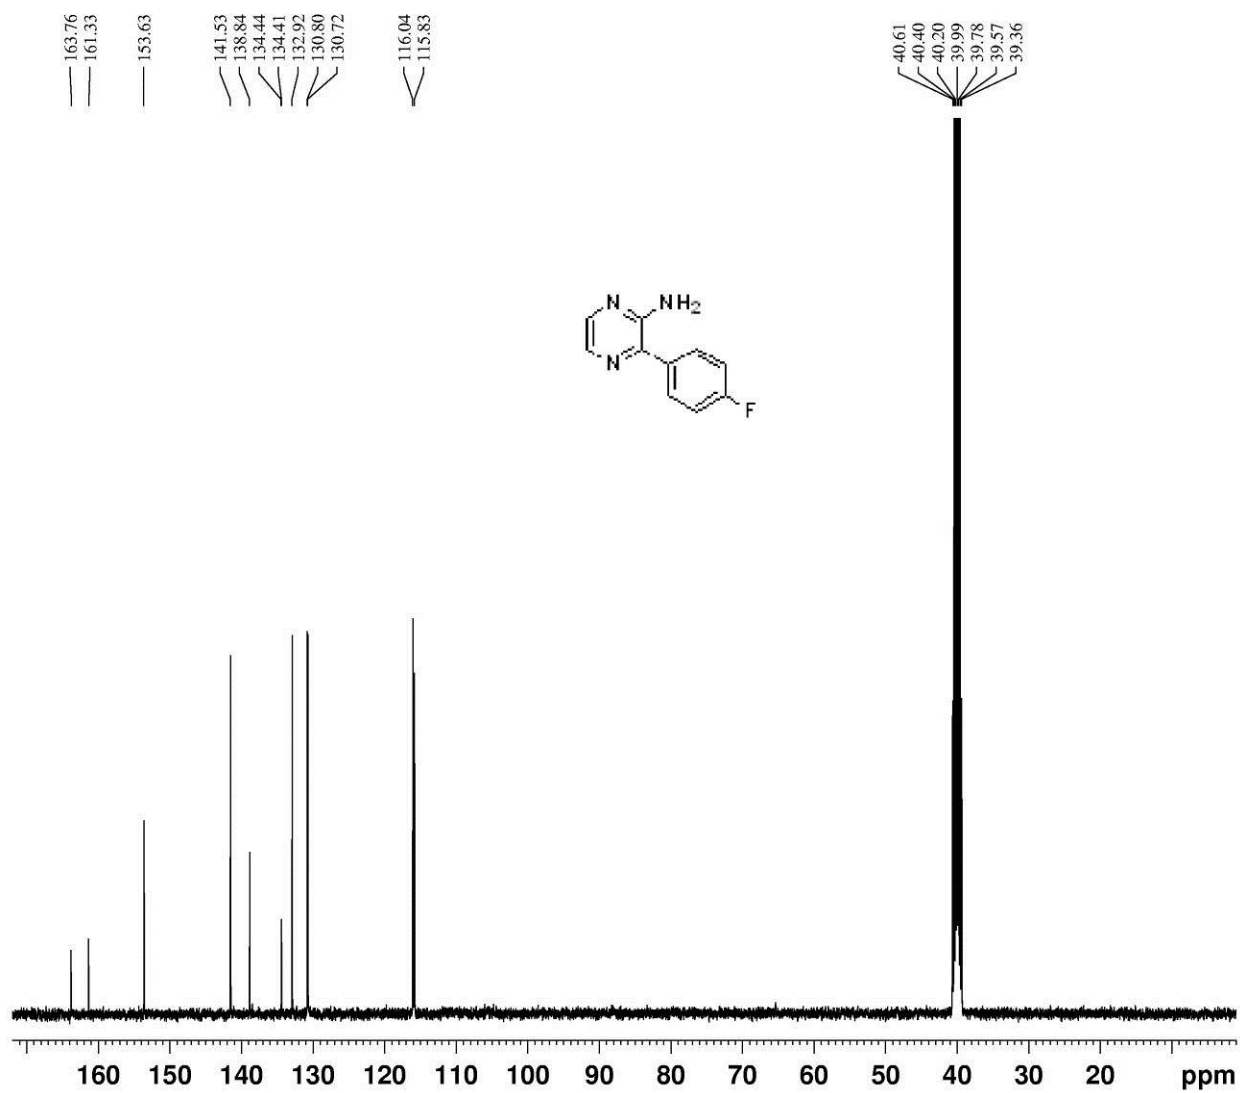

6c:  $^1\text{H}$  NMR

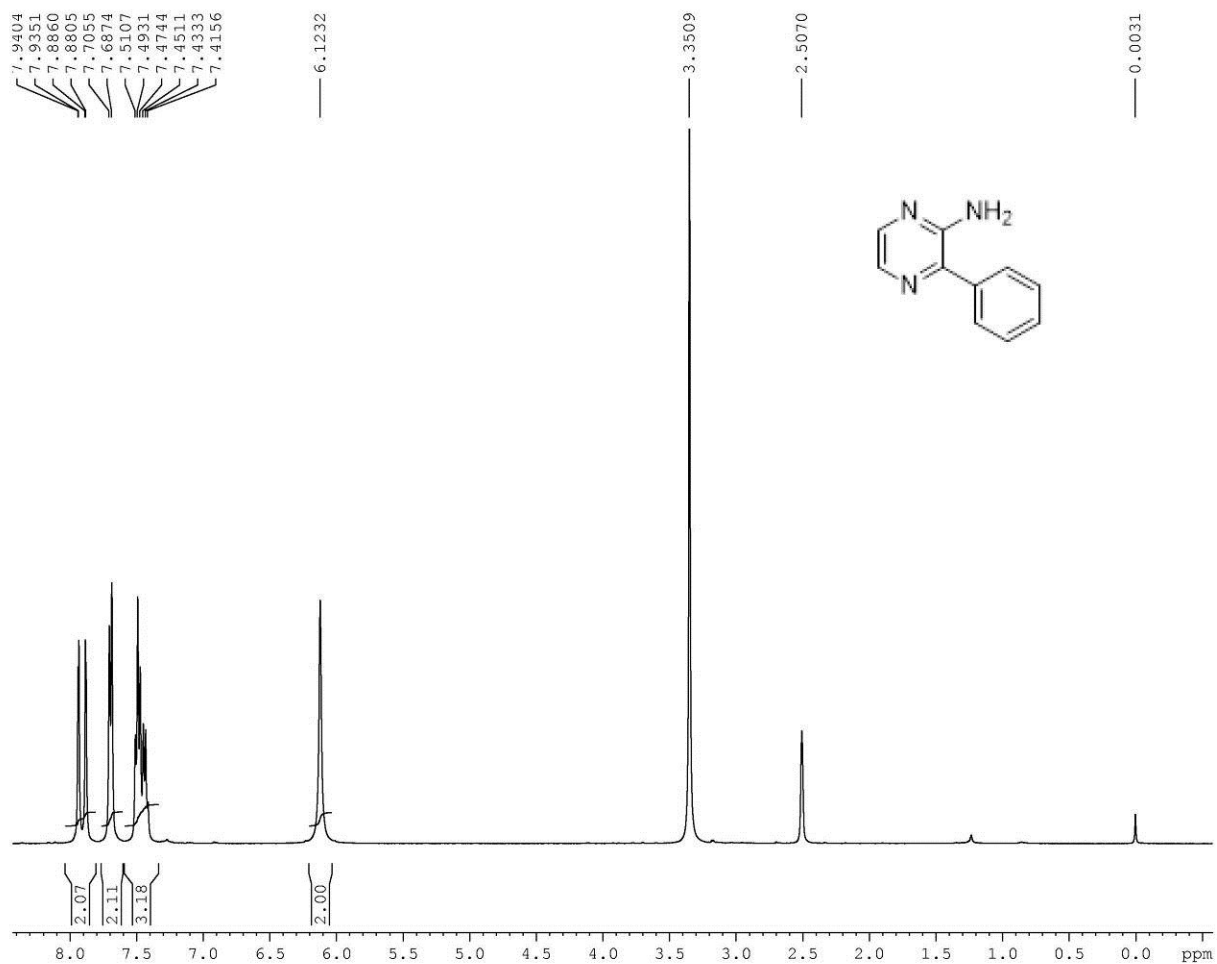

6c:  $^{13}\text{C}$  NMR

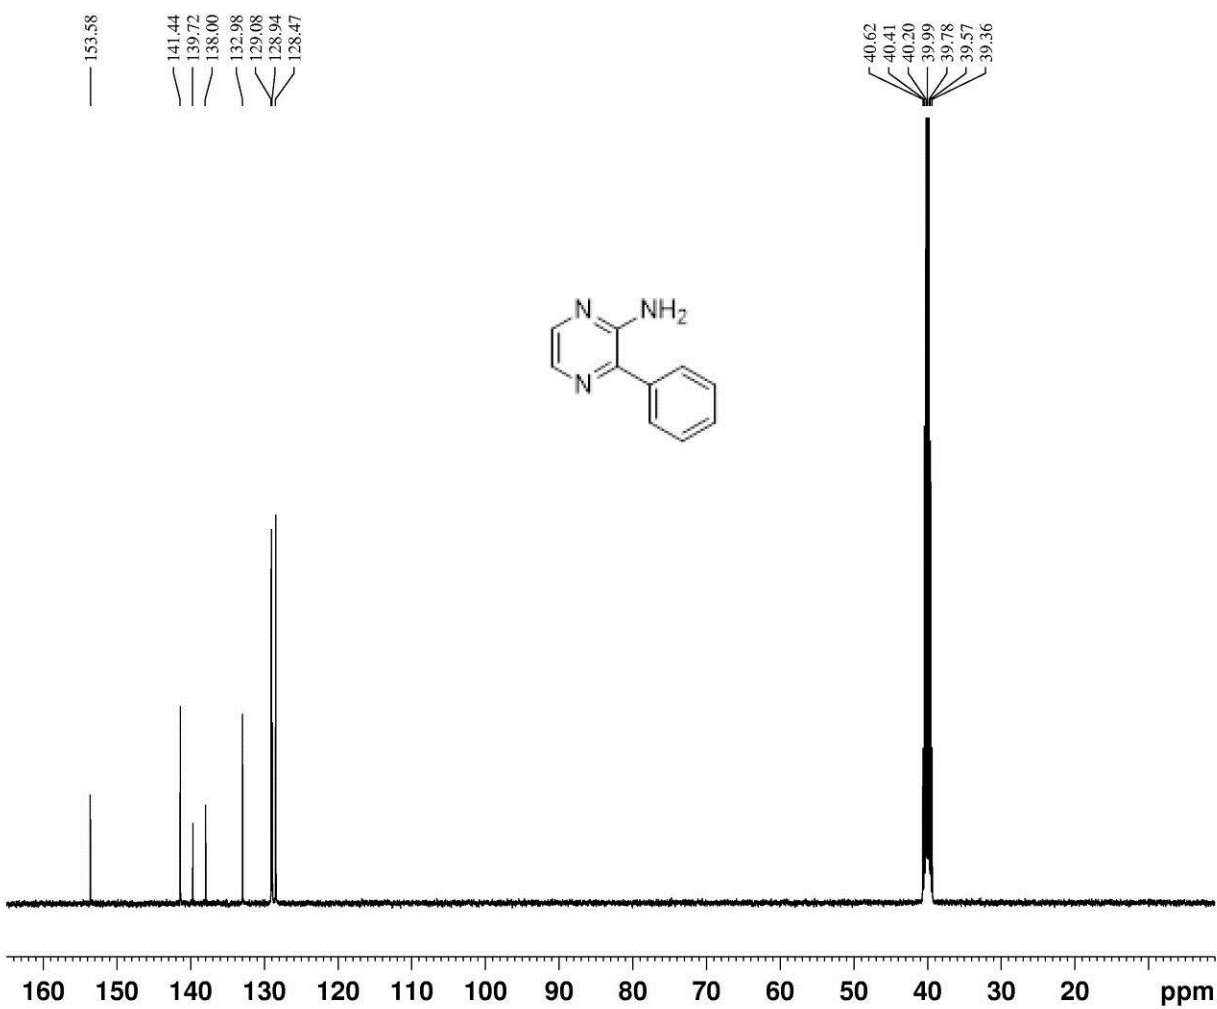

# 6d: <sup>1</sup>H NMR

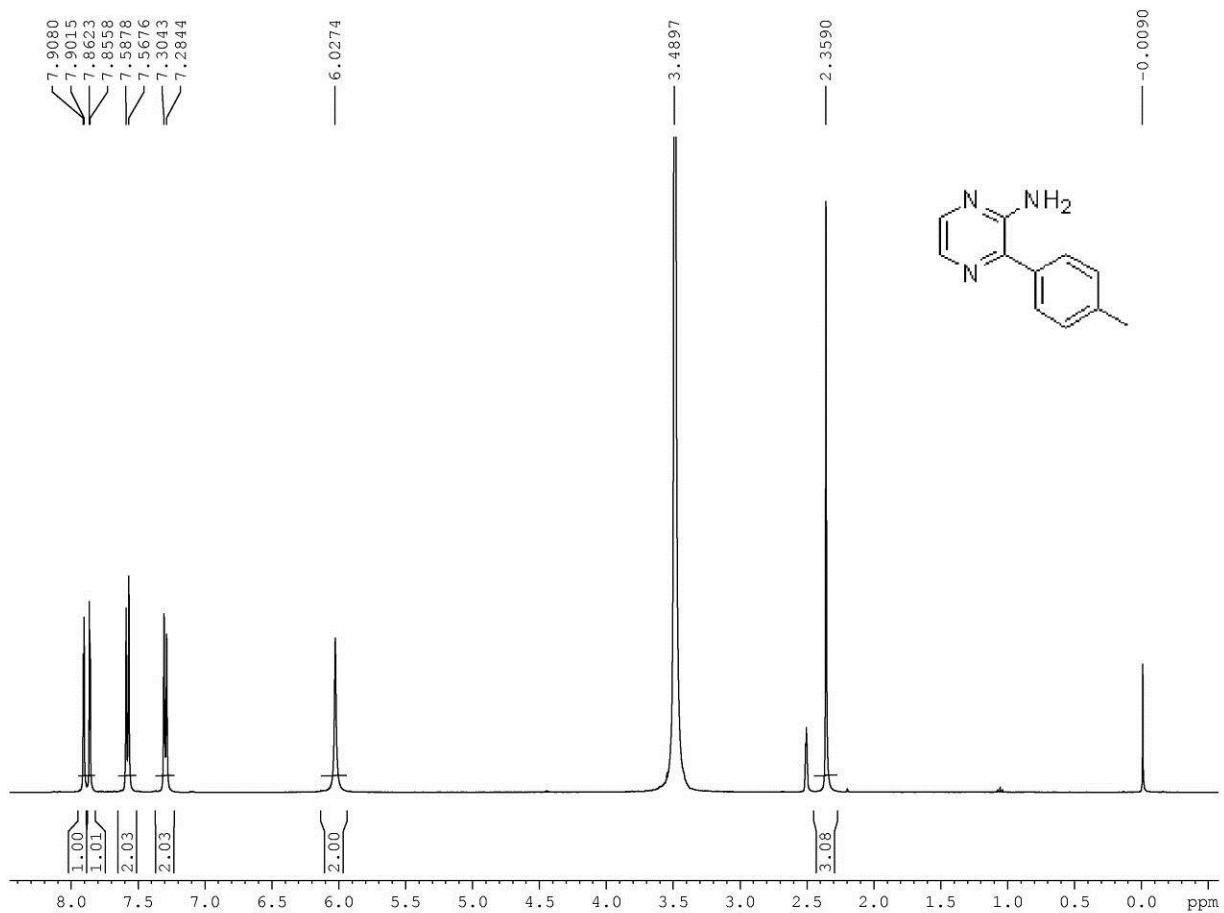

6d: <sup>13</sup>C NMR

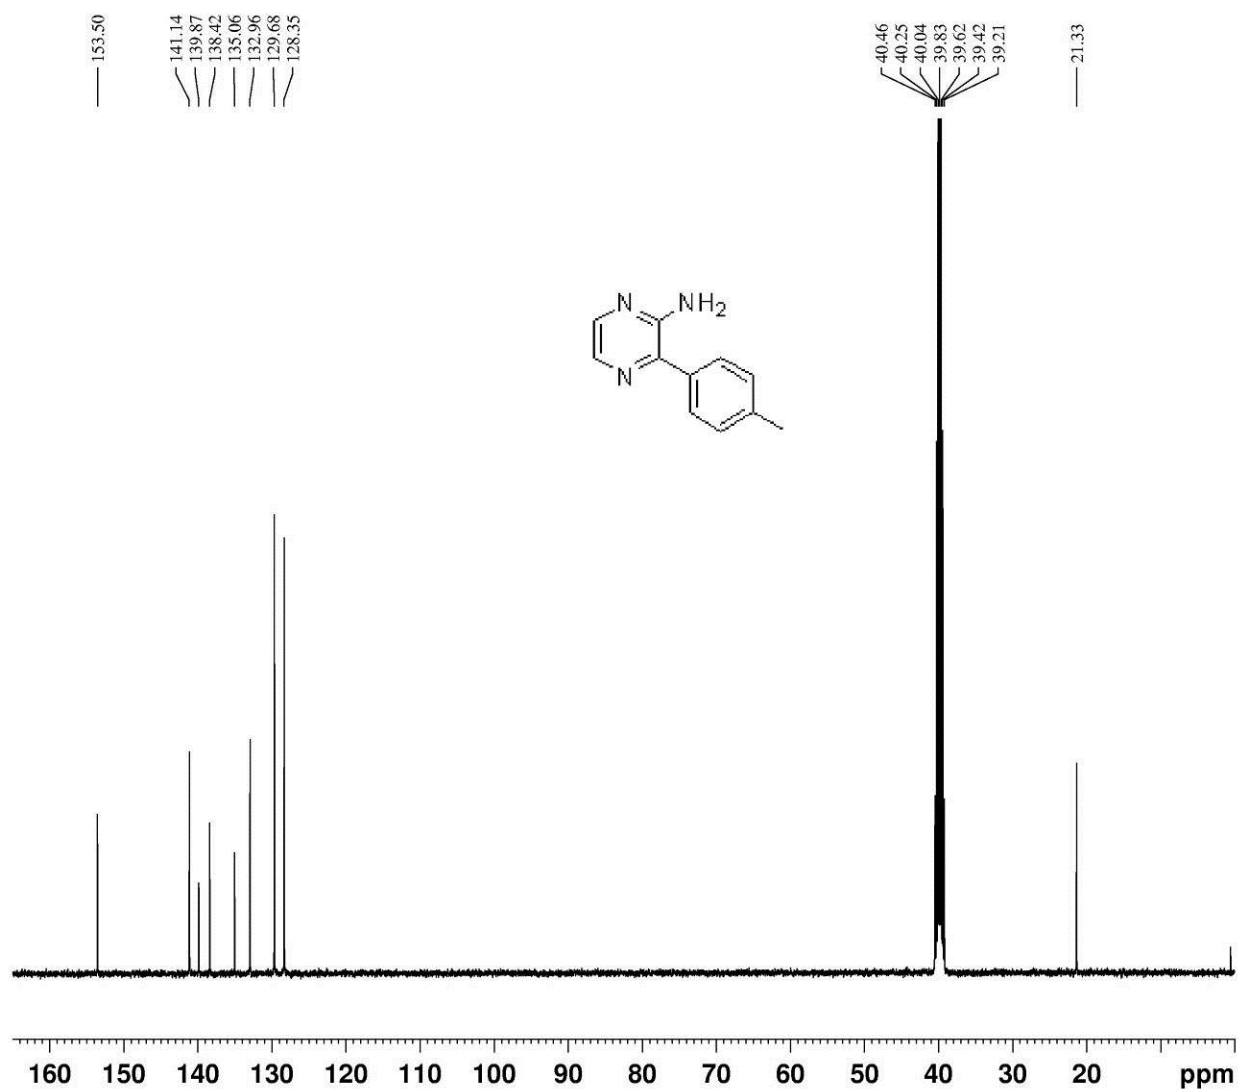

# 6e: <sup>1</sup>H NMR

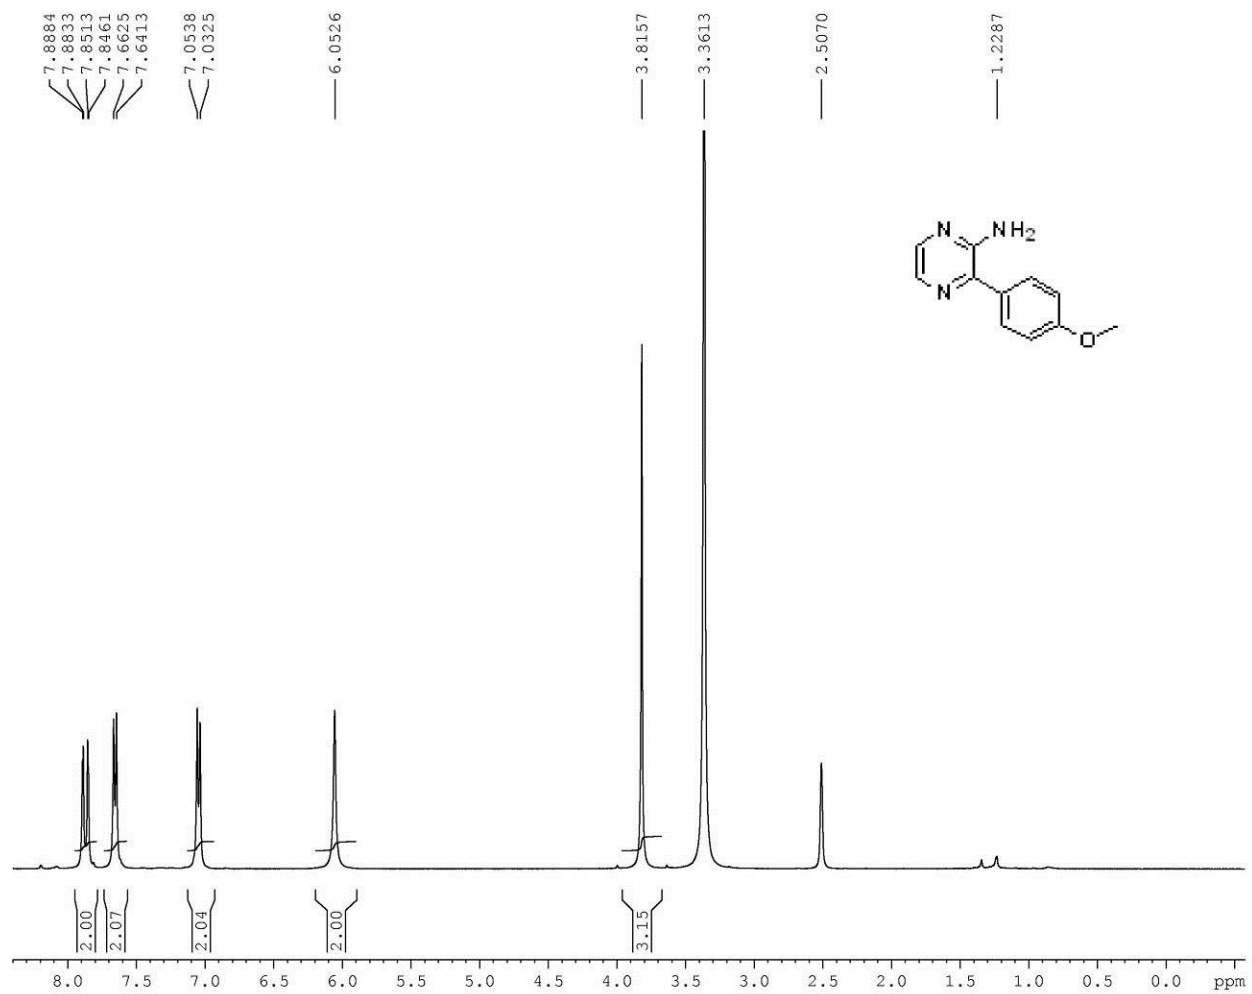

6e:  $^{13}\text{C}$  NMR

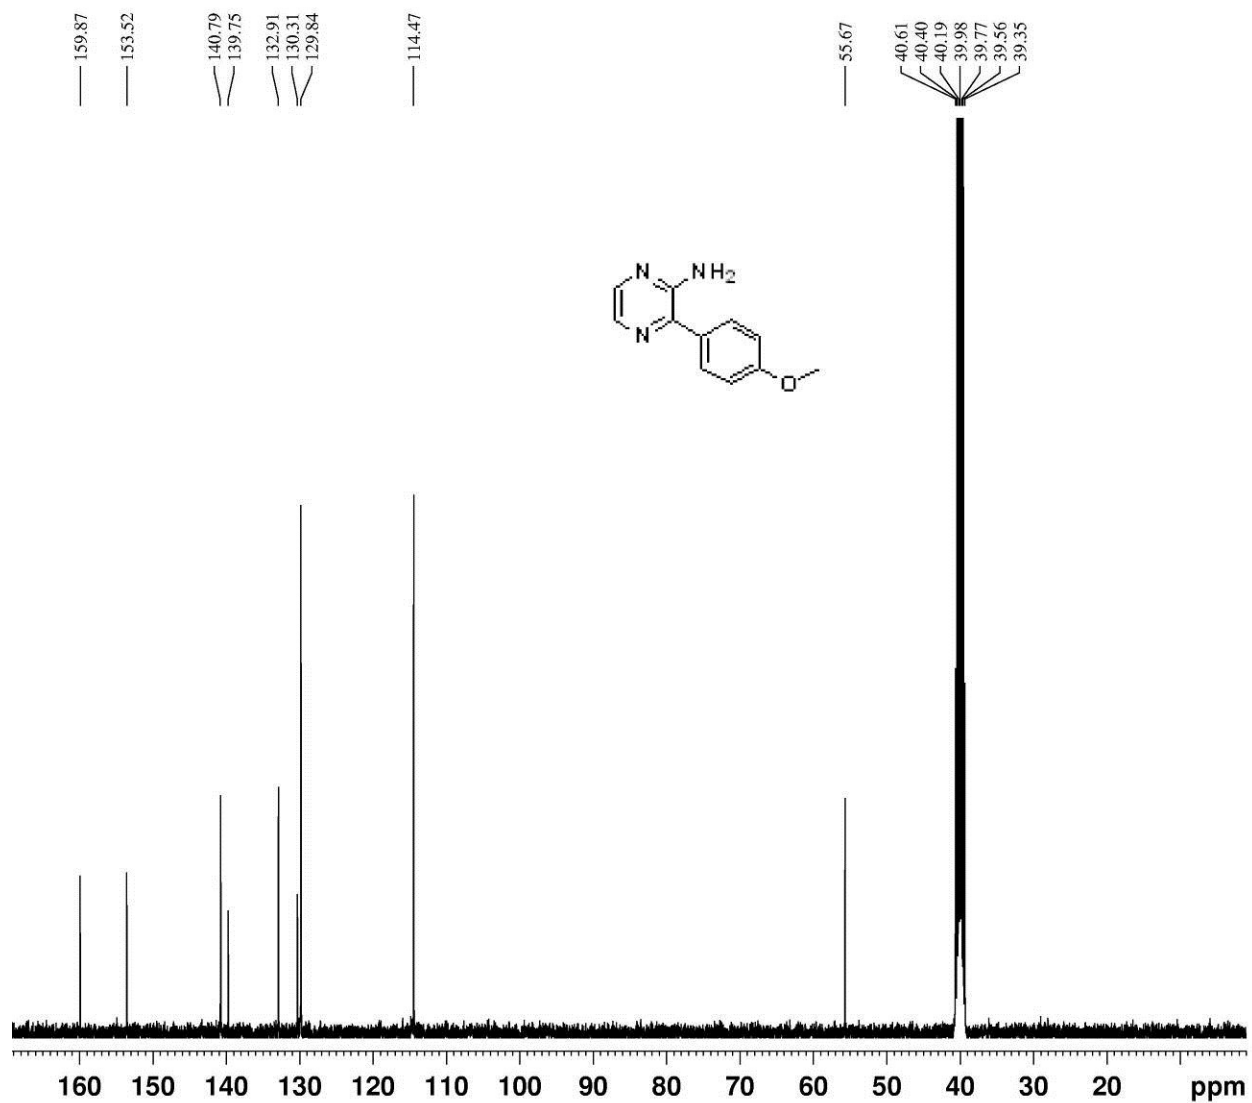

# 6f: <sup>1</sup>H NMR

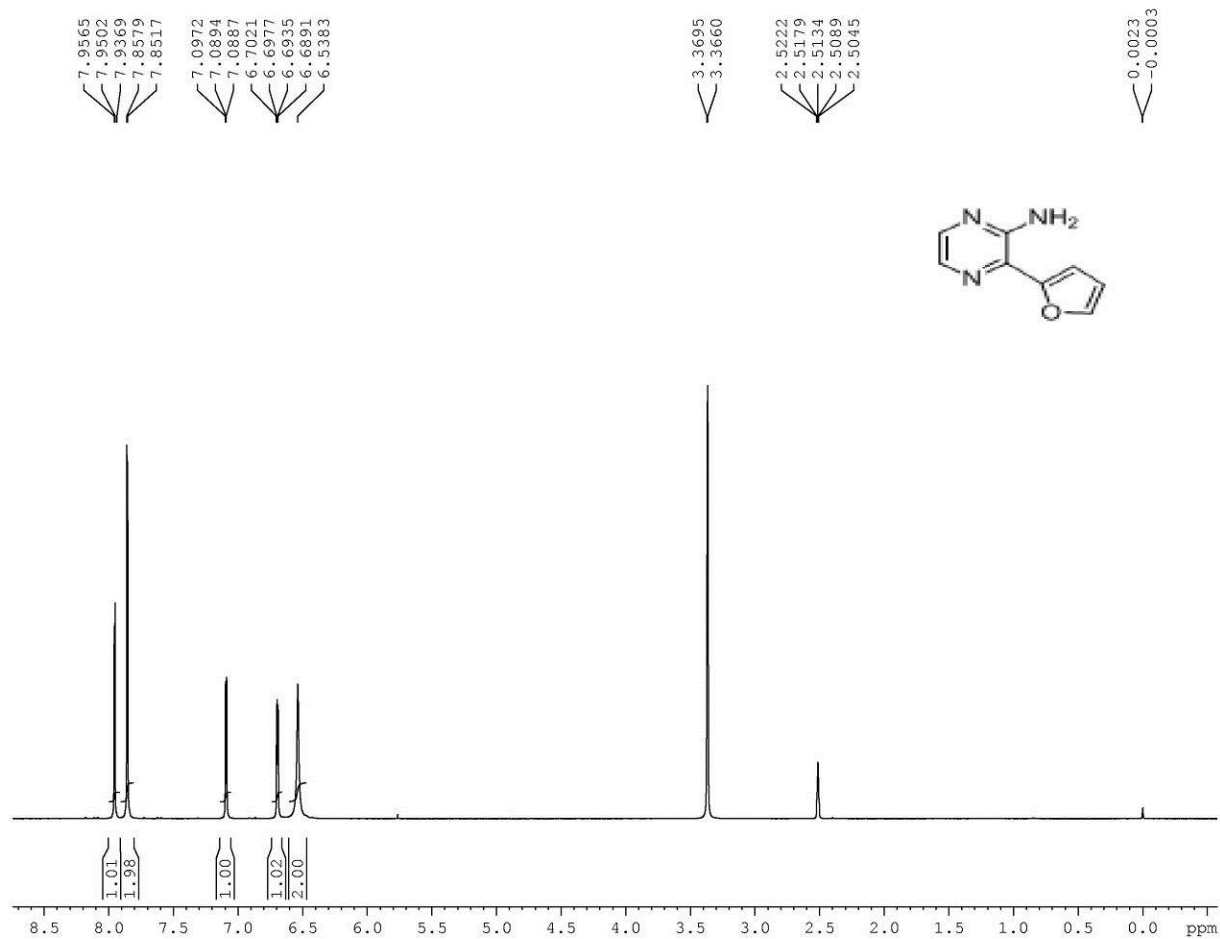



6f:  $^{13}\text{C}$  NMR

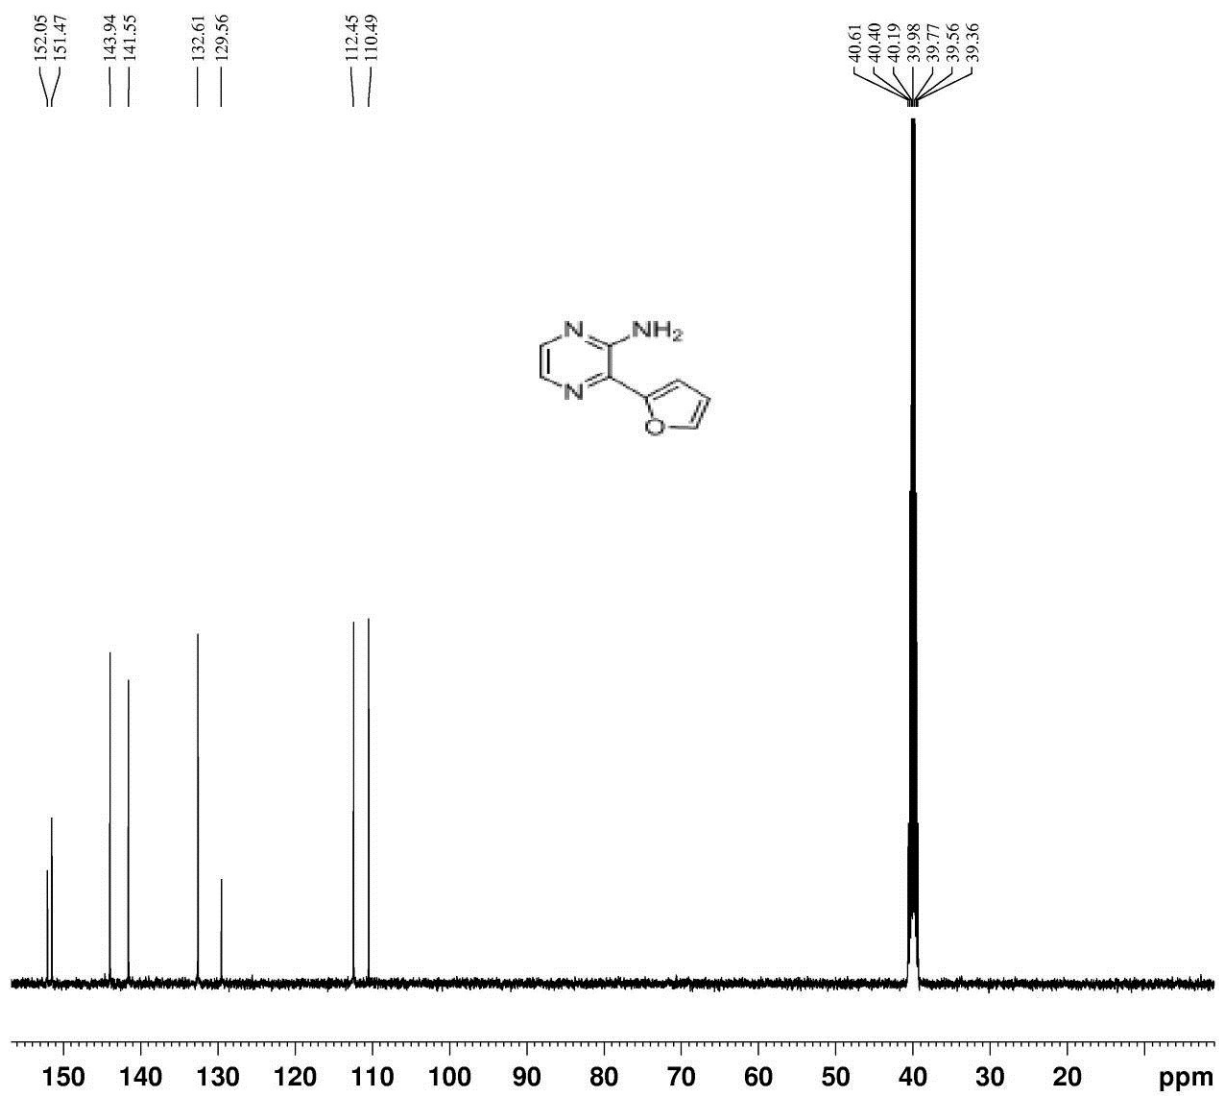

# 6g: <sup>1</sup>H NMR

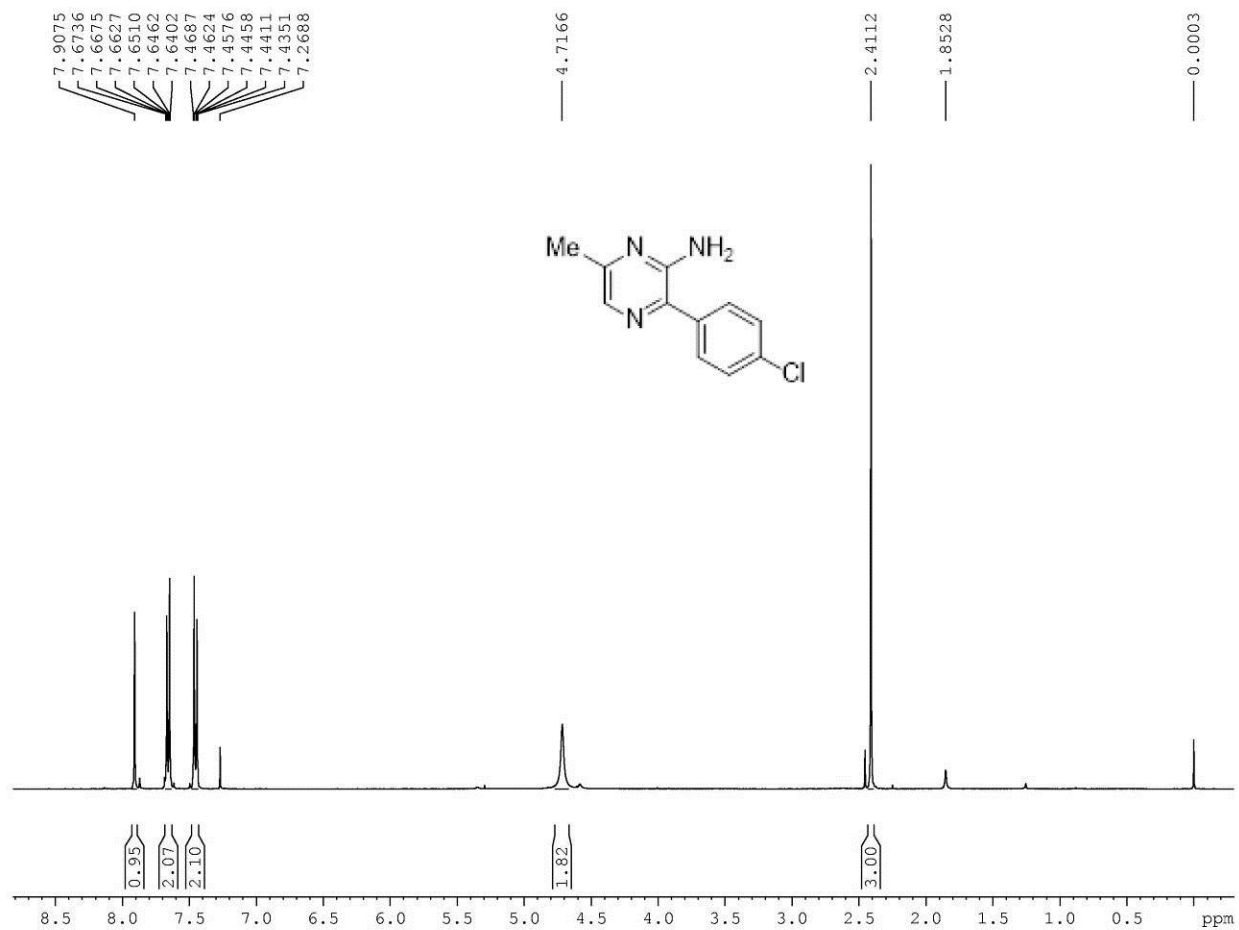

6g: <sup>13</sup>C NMR

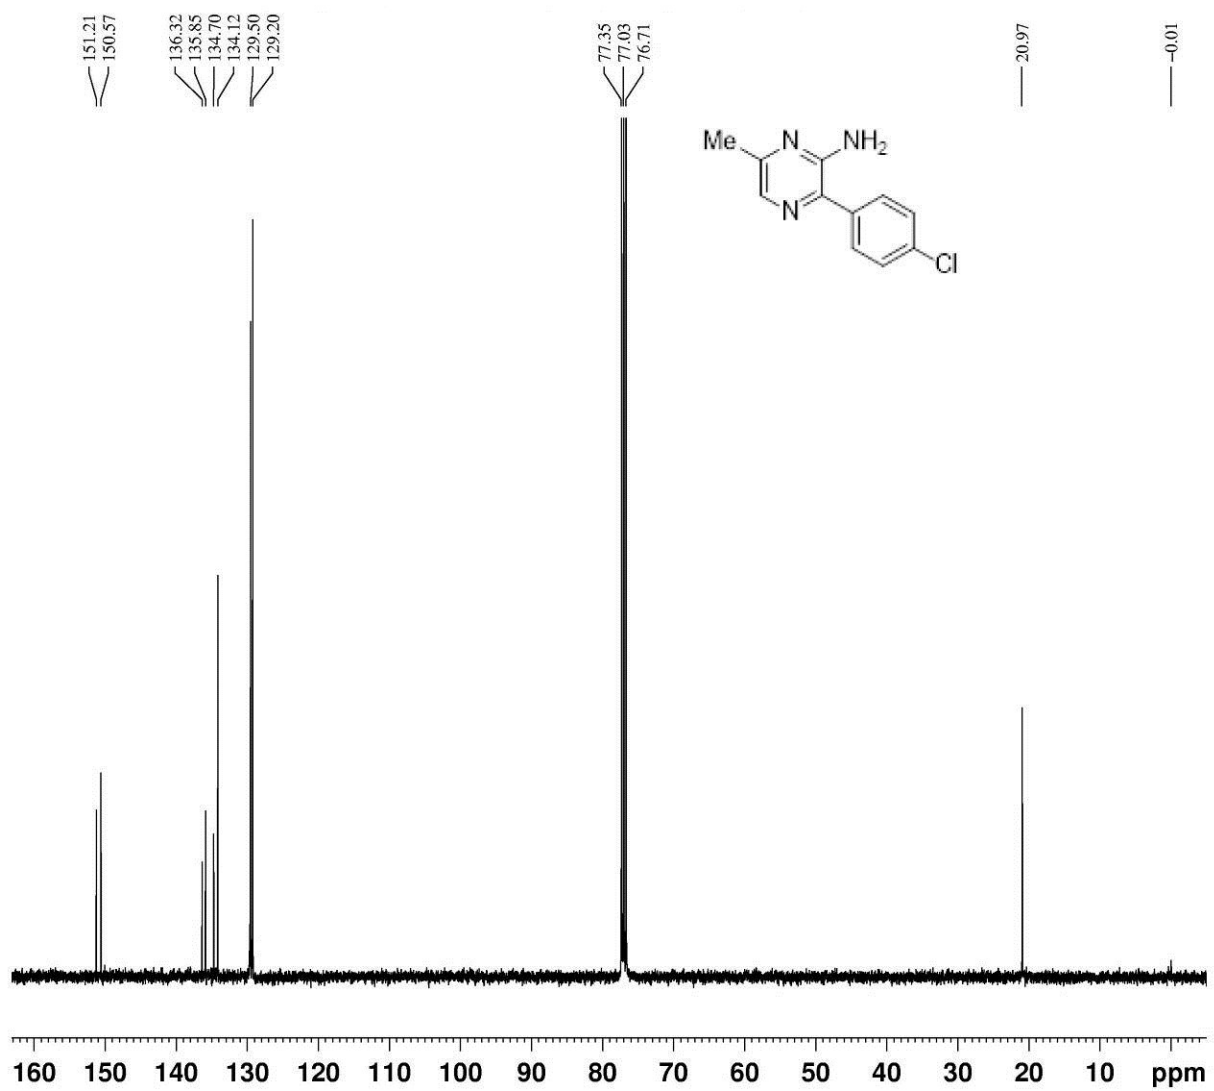

# 6h: <sup>1</sup>H NMR

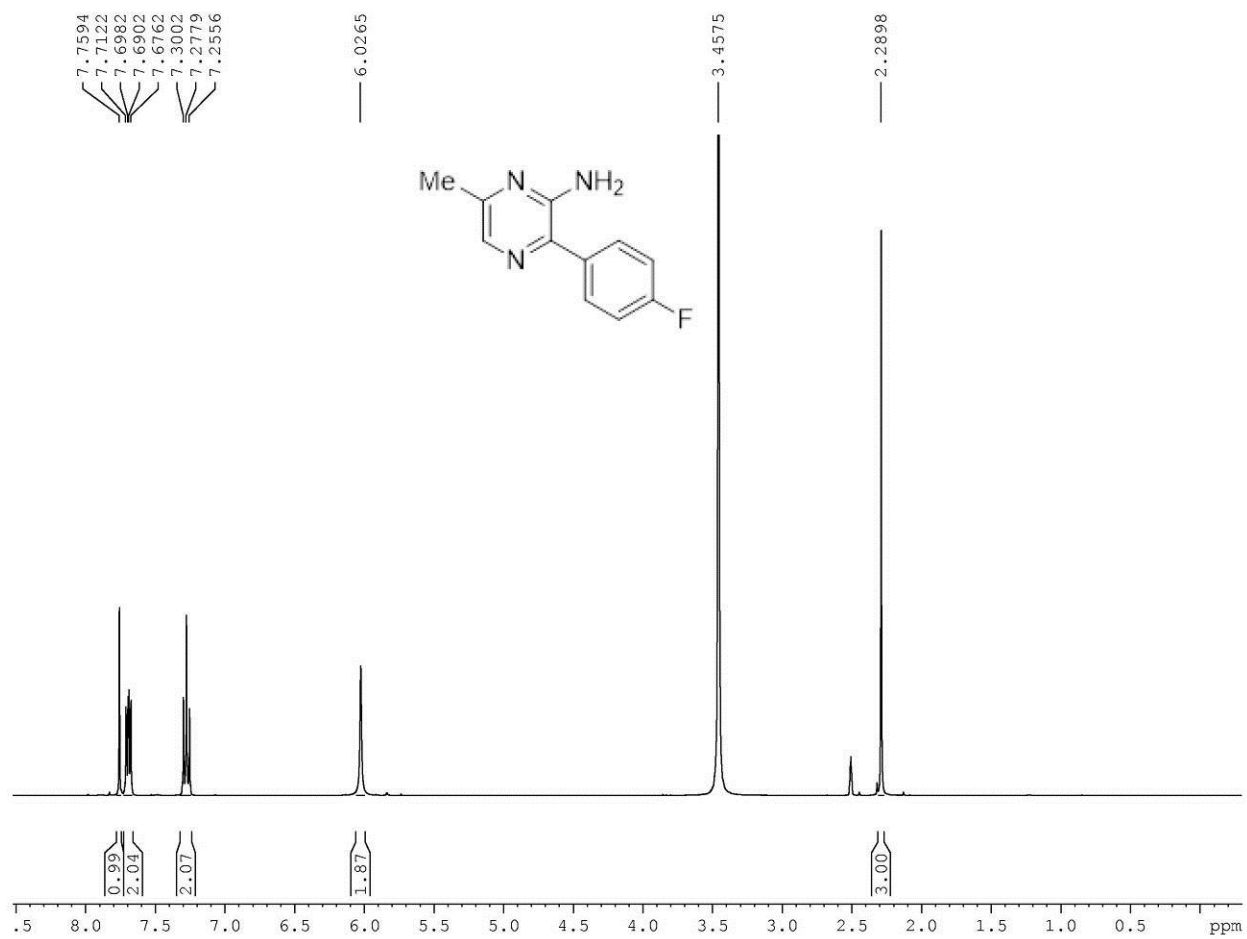

6h: <sup>13</sup>C NMR

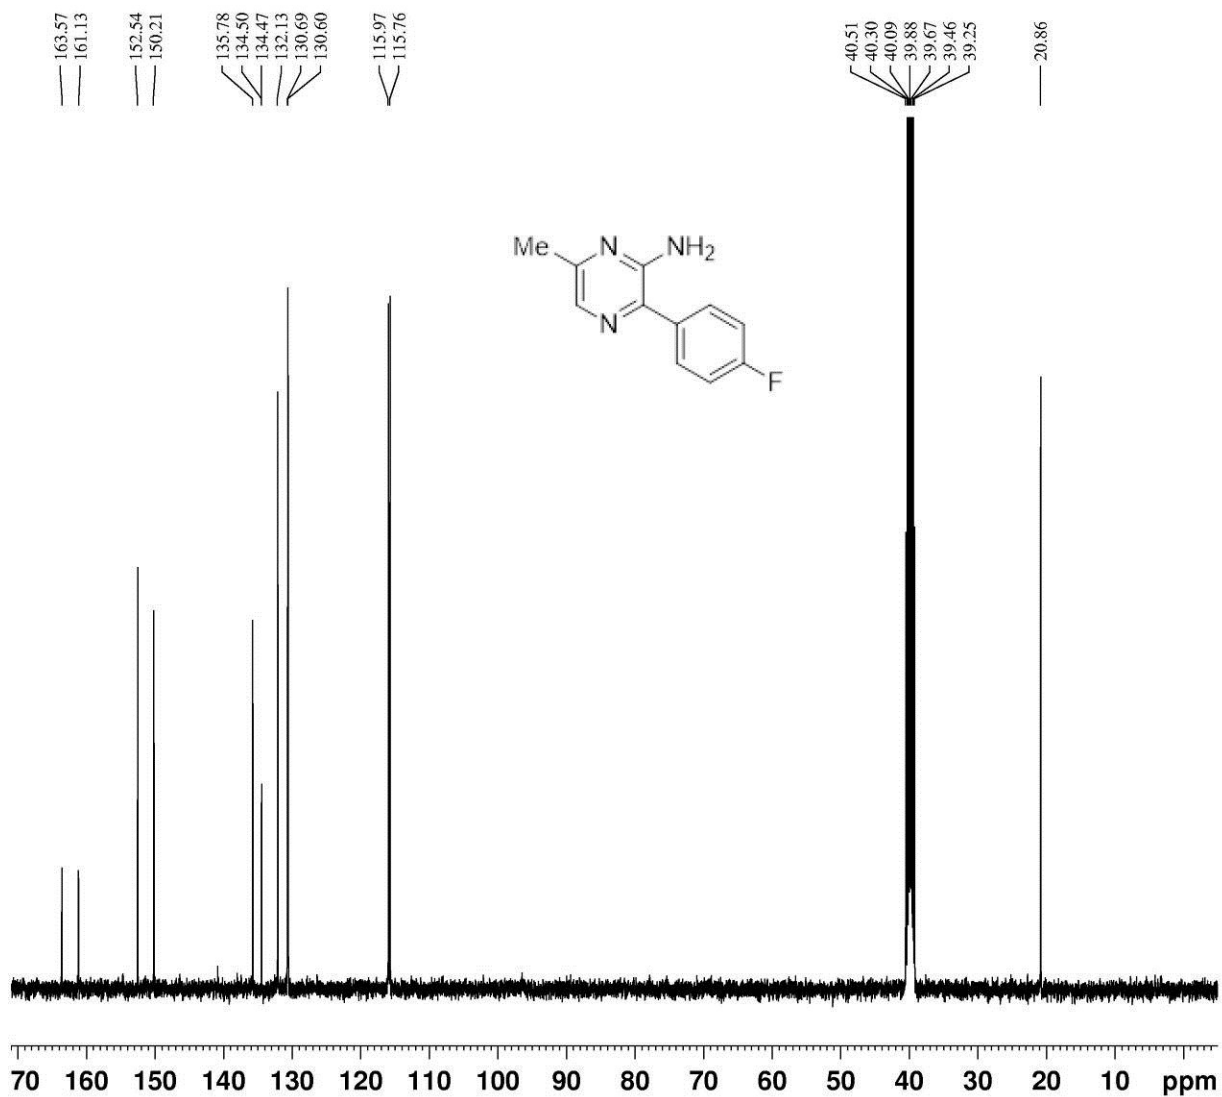

# 6i: <sup>1</sup>H NMR

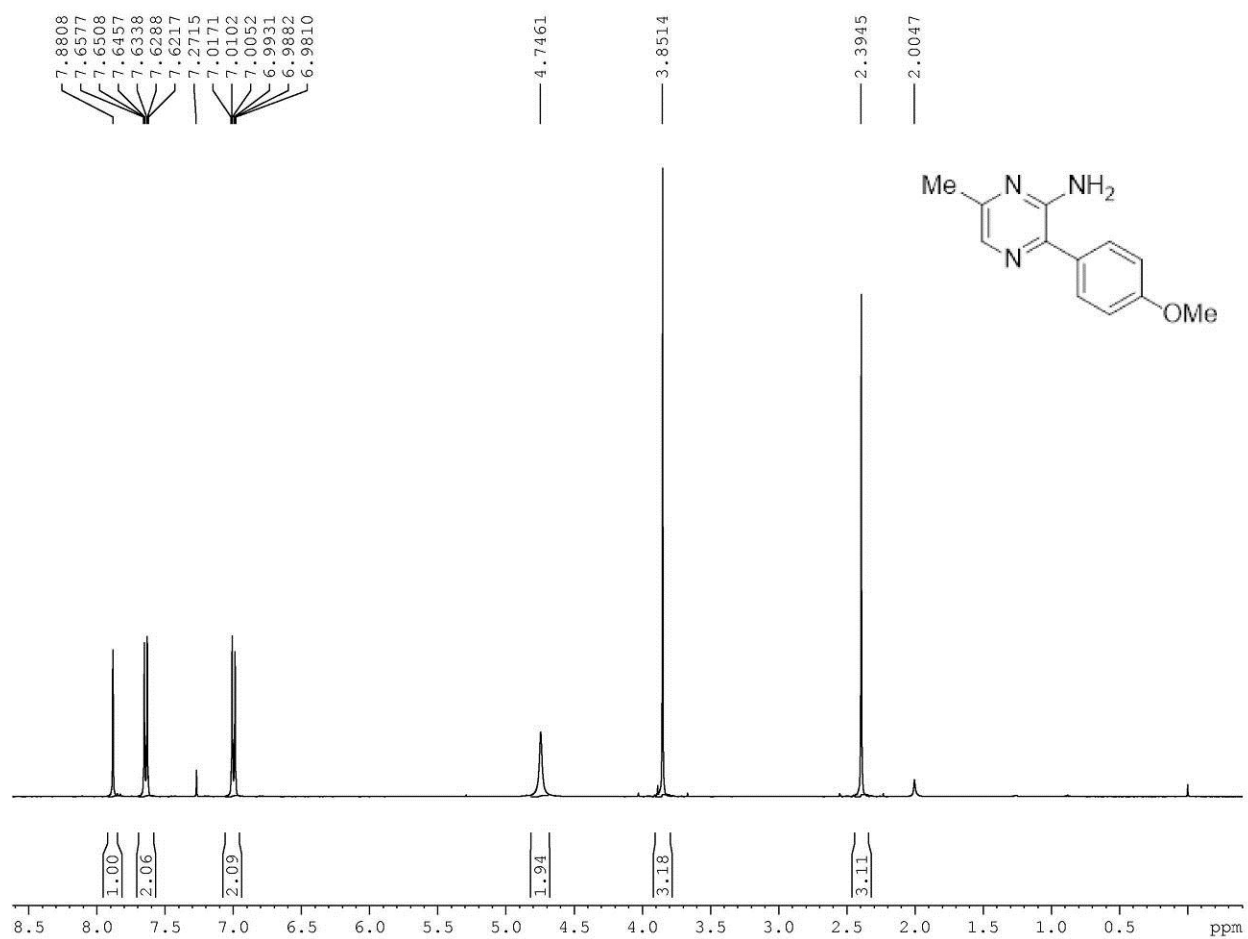

6i:  $^{13}\text{C}$  NMR

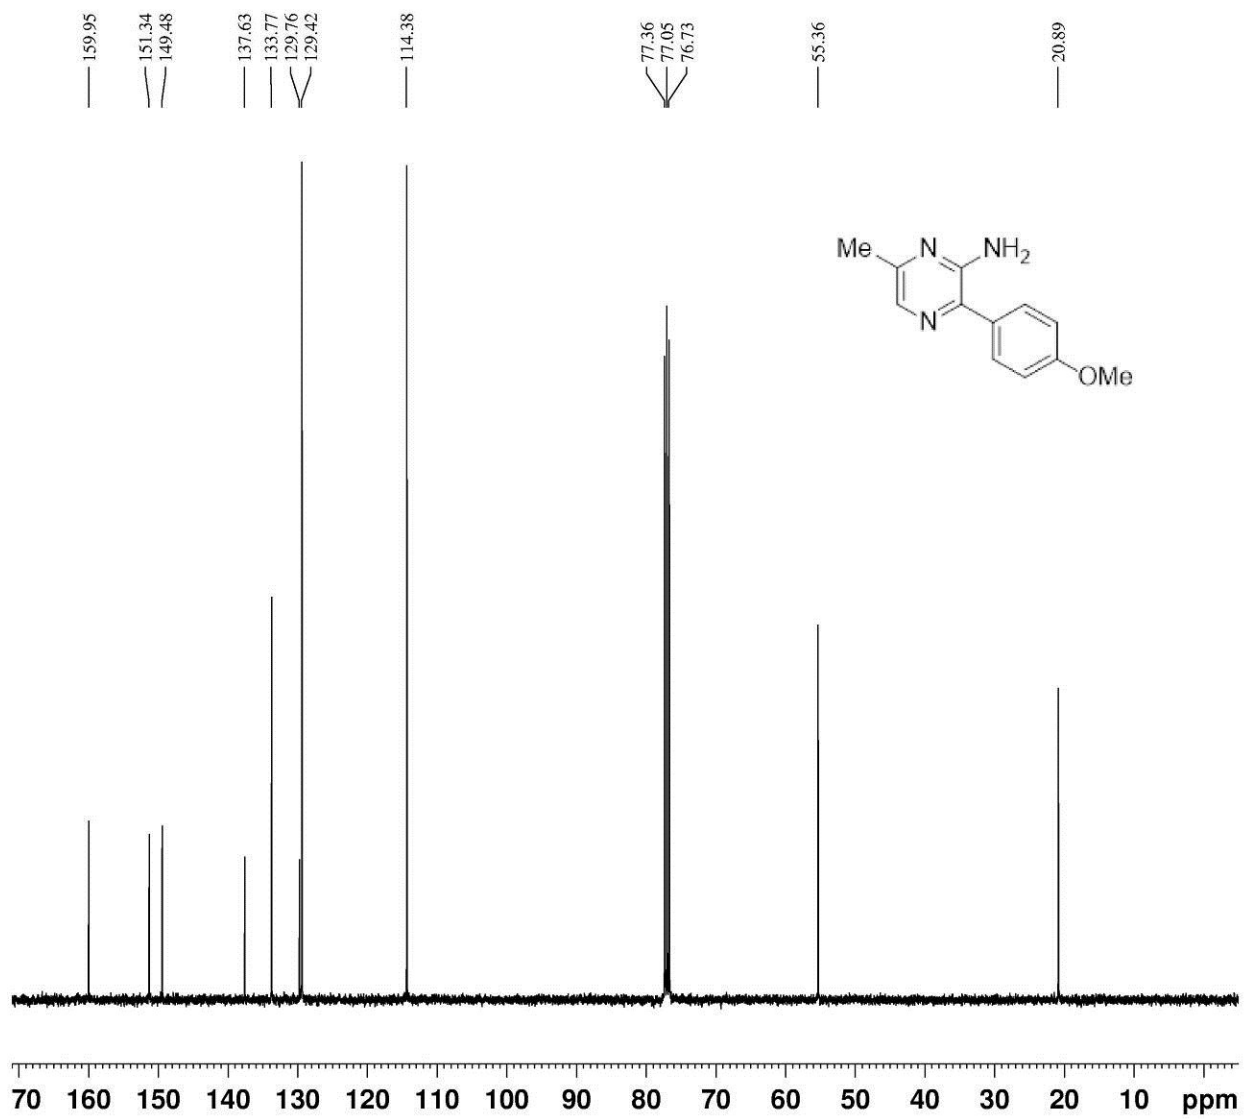

# 6j: <sup>1</sup>H NMR

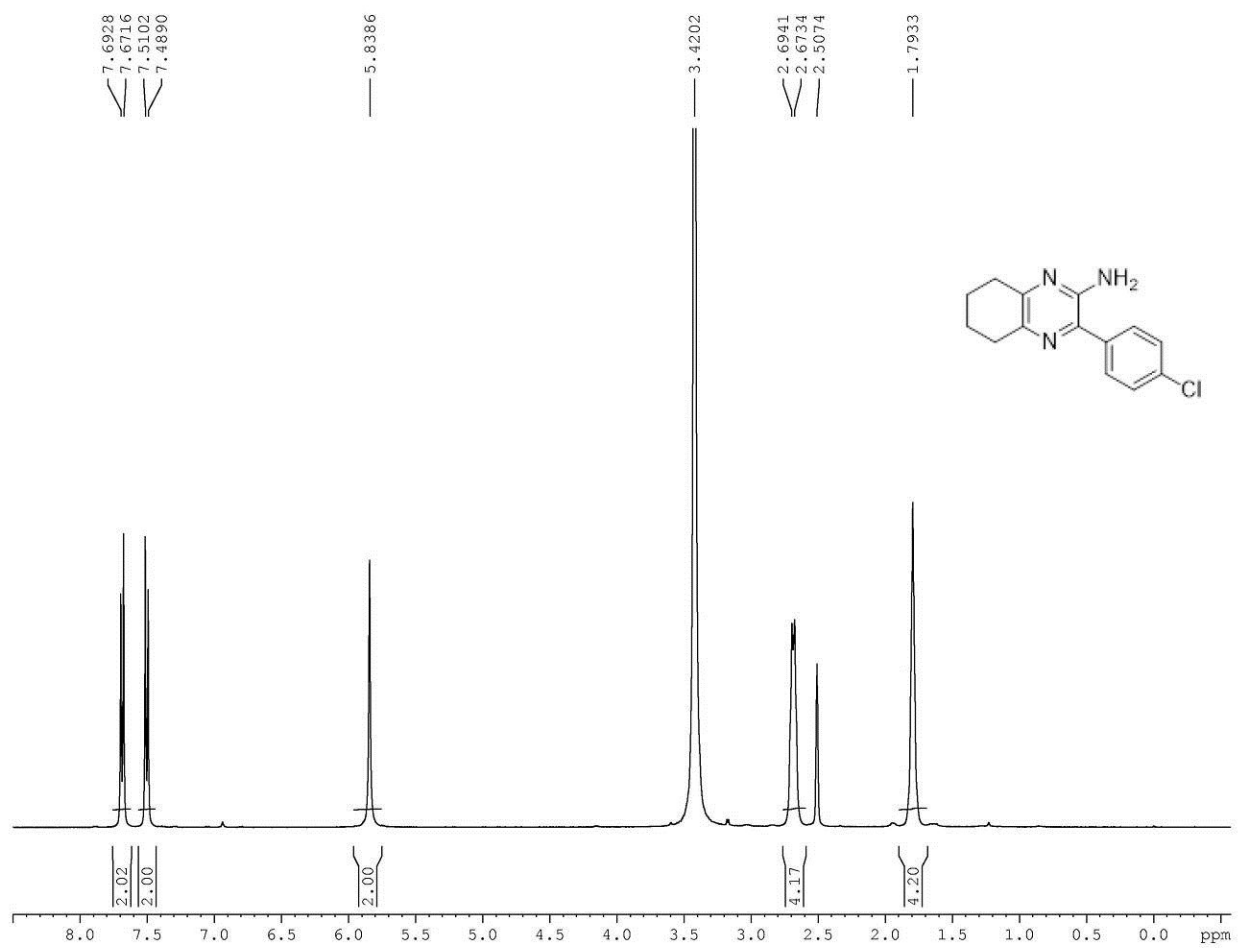



6j: <sup>13</sup>C NMR

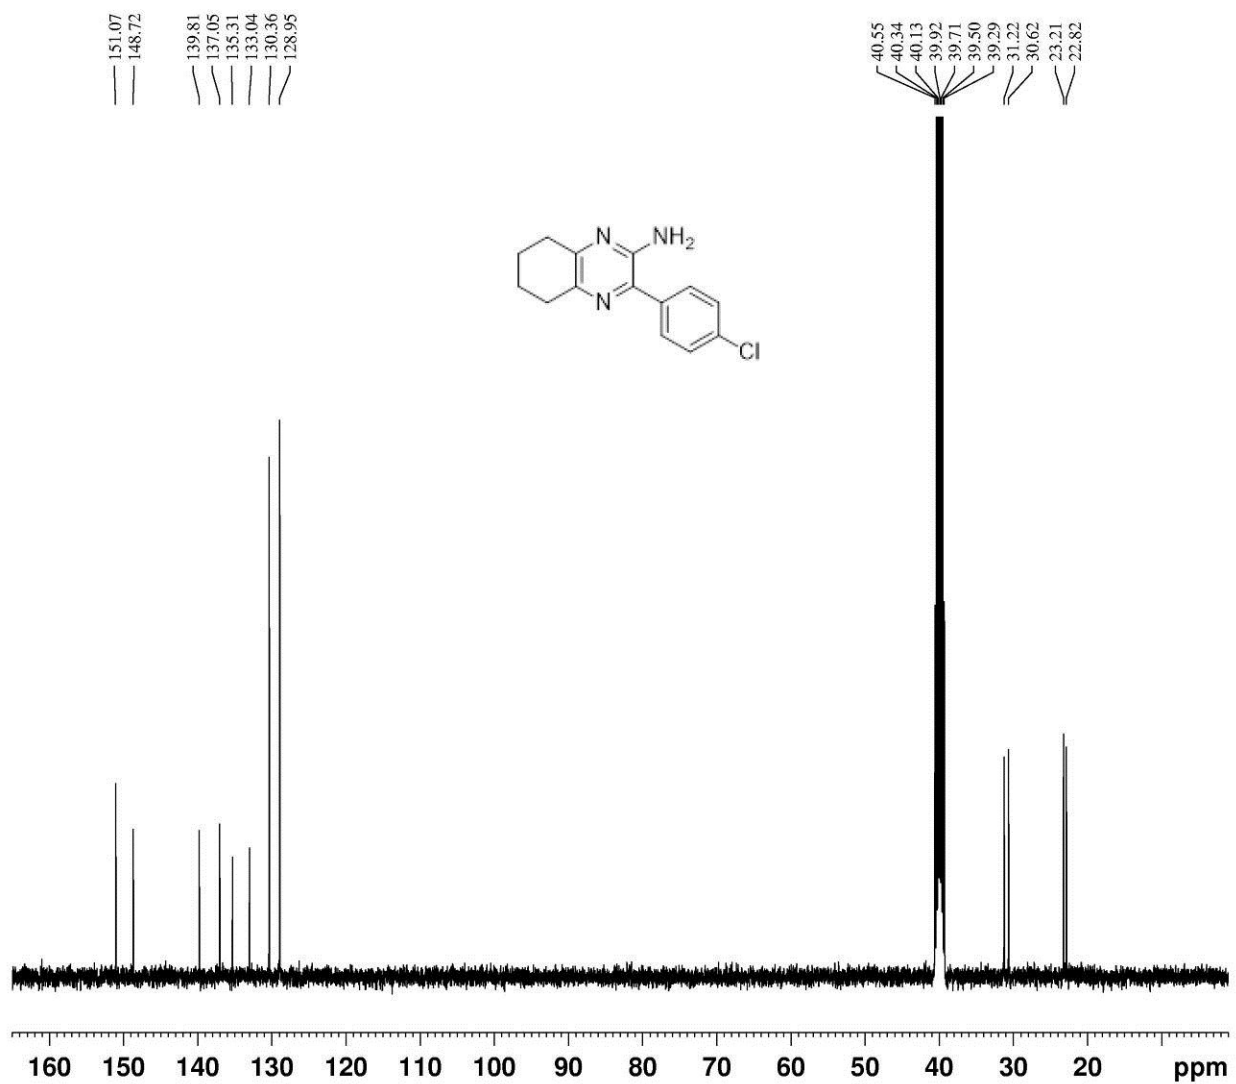

# 6k: <sup>1</sup>H NMR

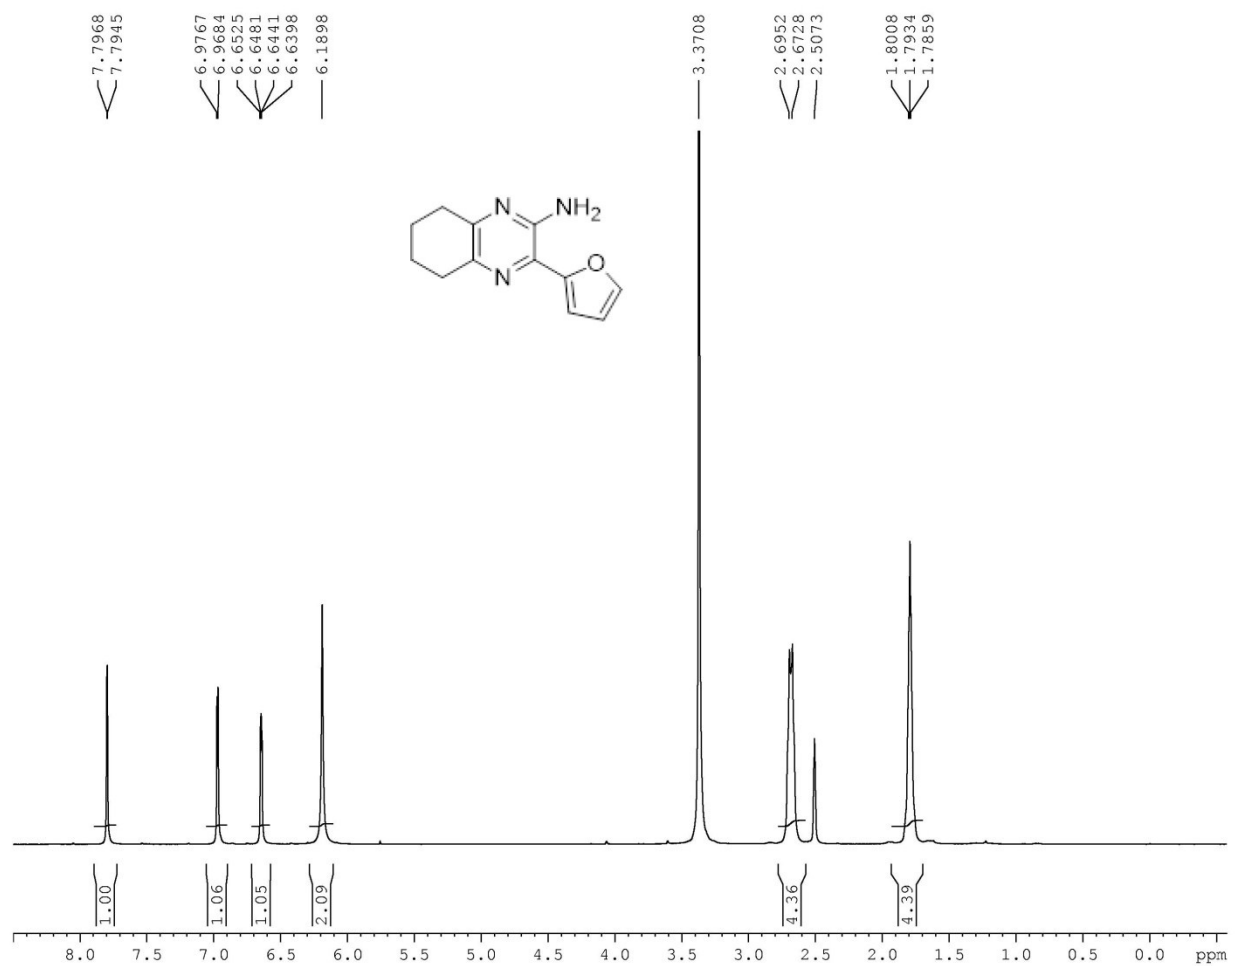

6k: <sup>13</sup>C NMR

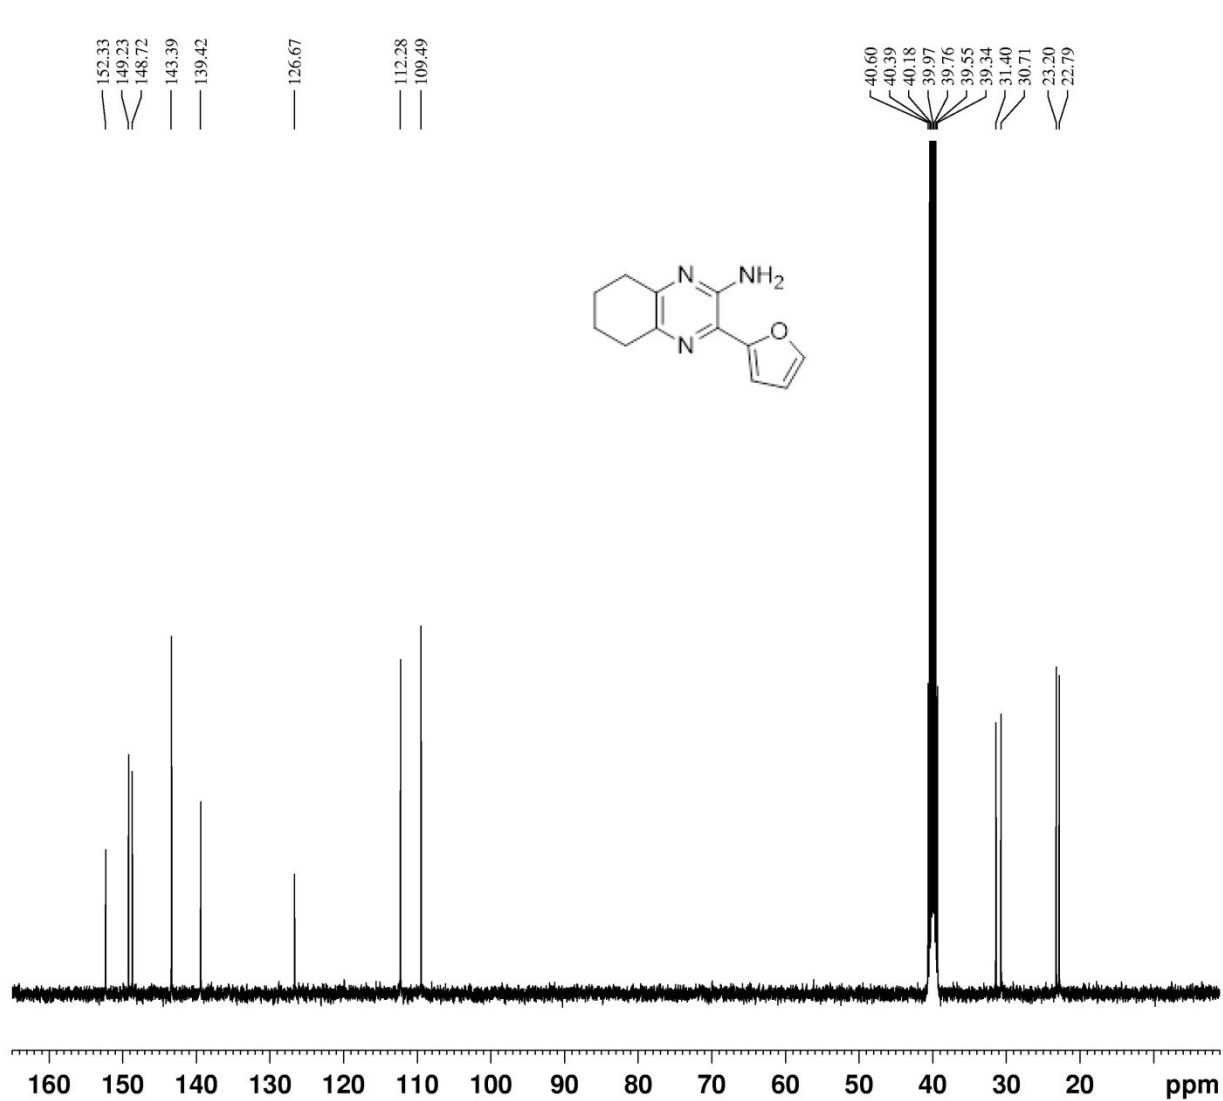

# 4a: <sup>1</sup>H NMR

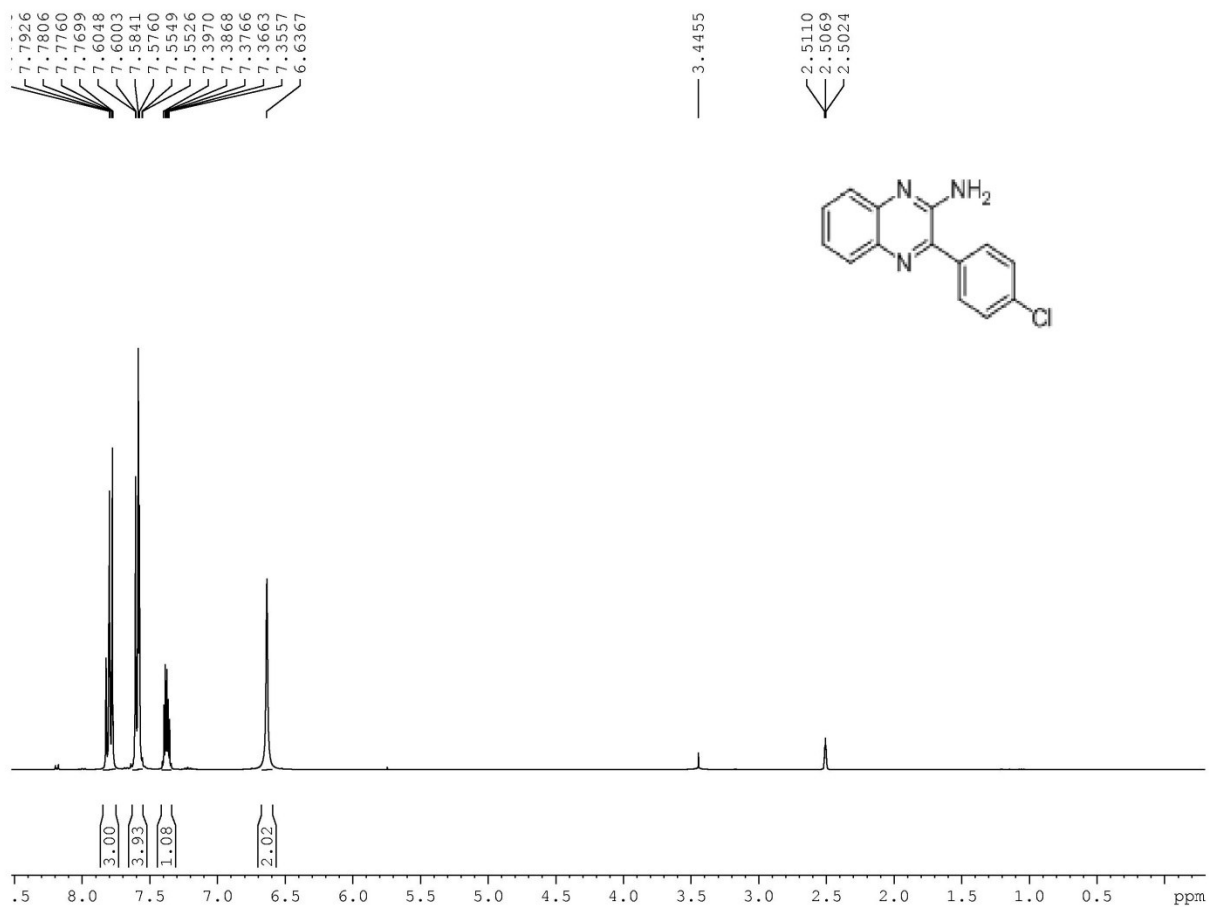

4a: <sup>13</sup>C NMR

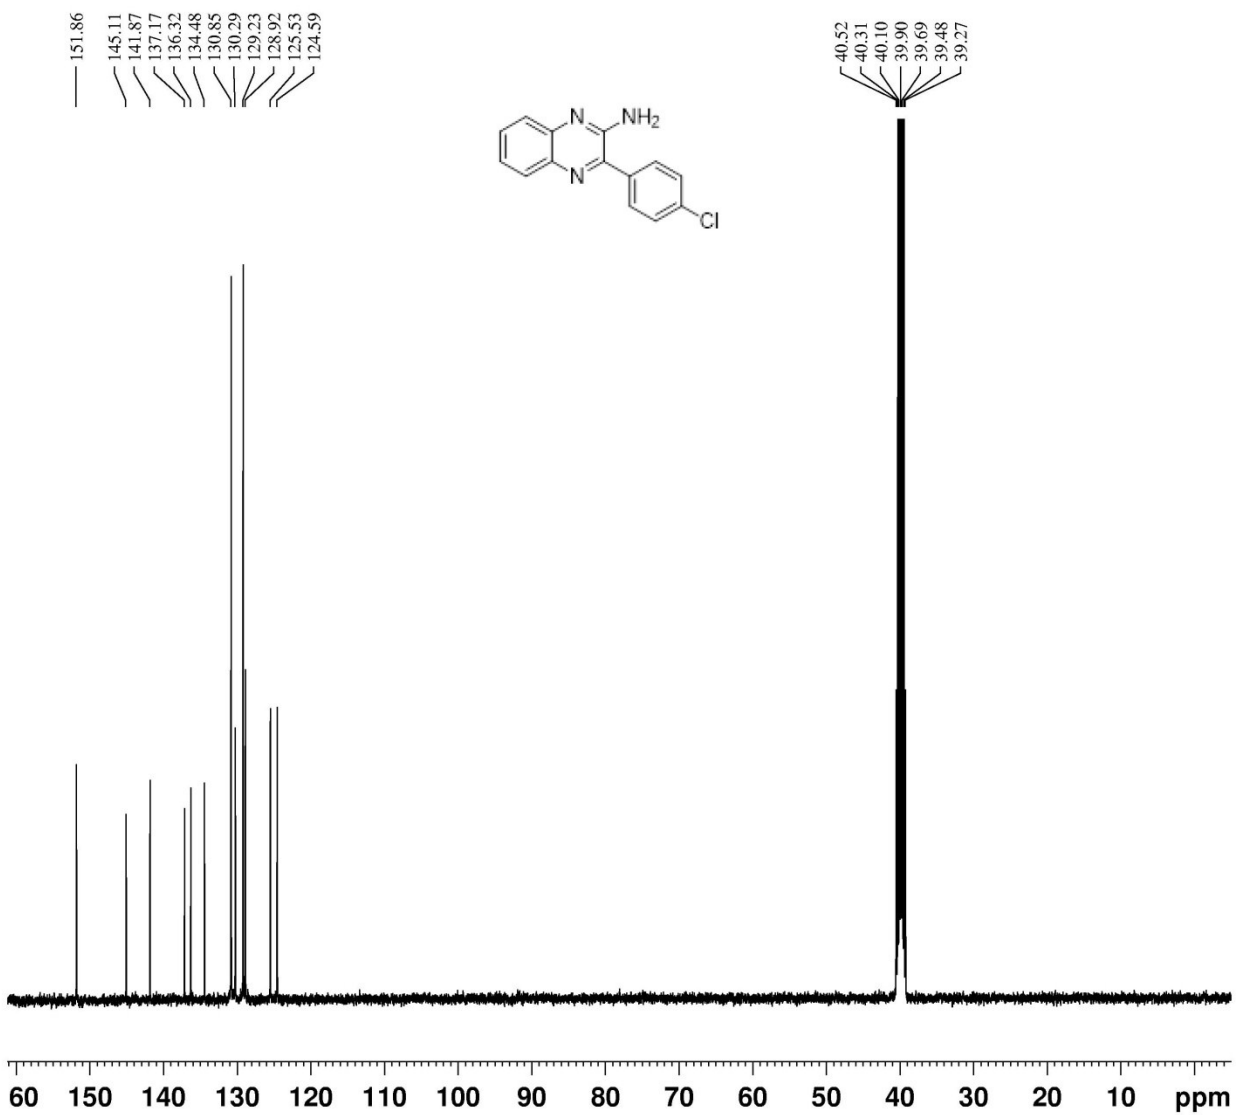

# 4b: <sup>1</sup>H NMR

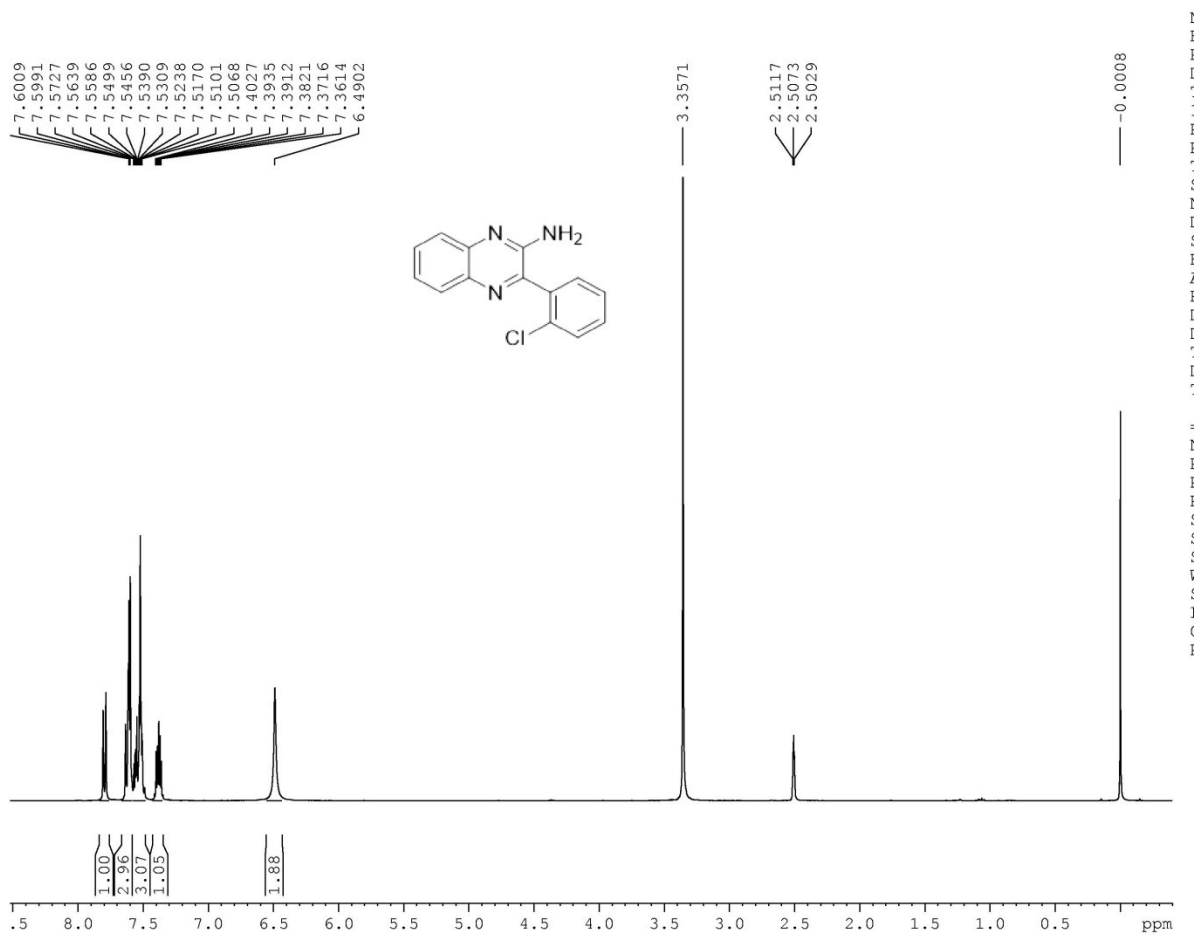

### 4b: <sup>13</sup>C NMR

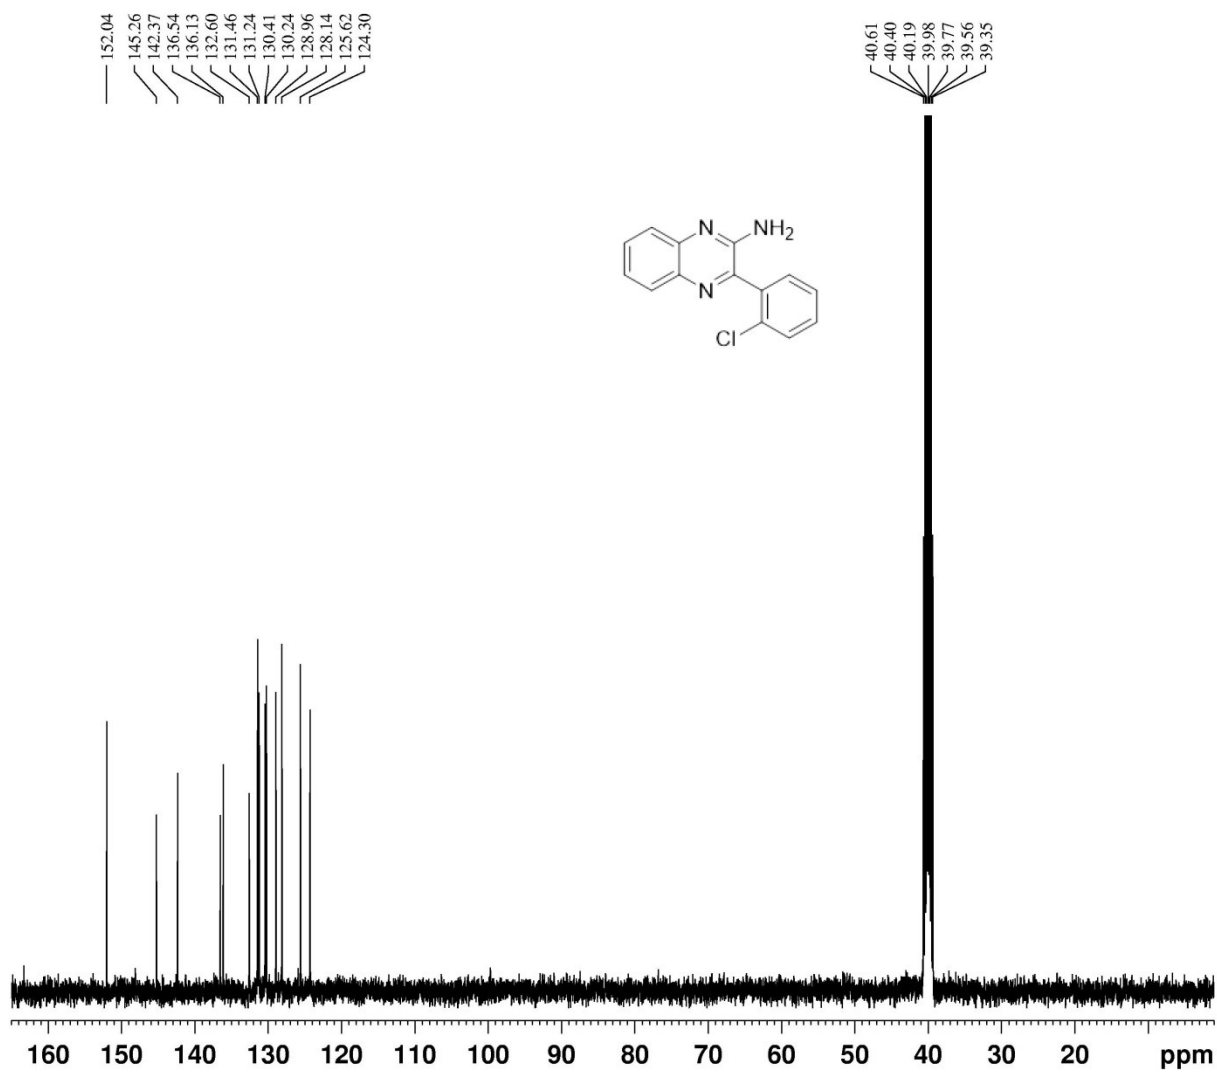

# 4c: <sup>1</sup>H NMR

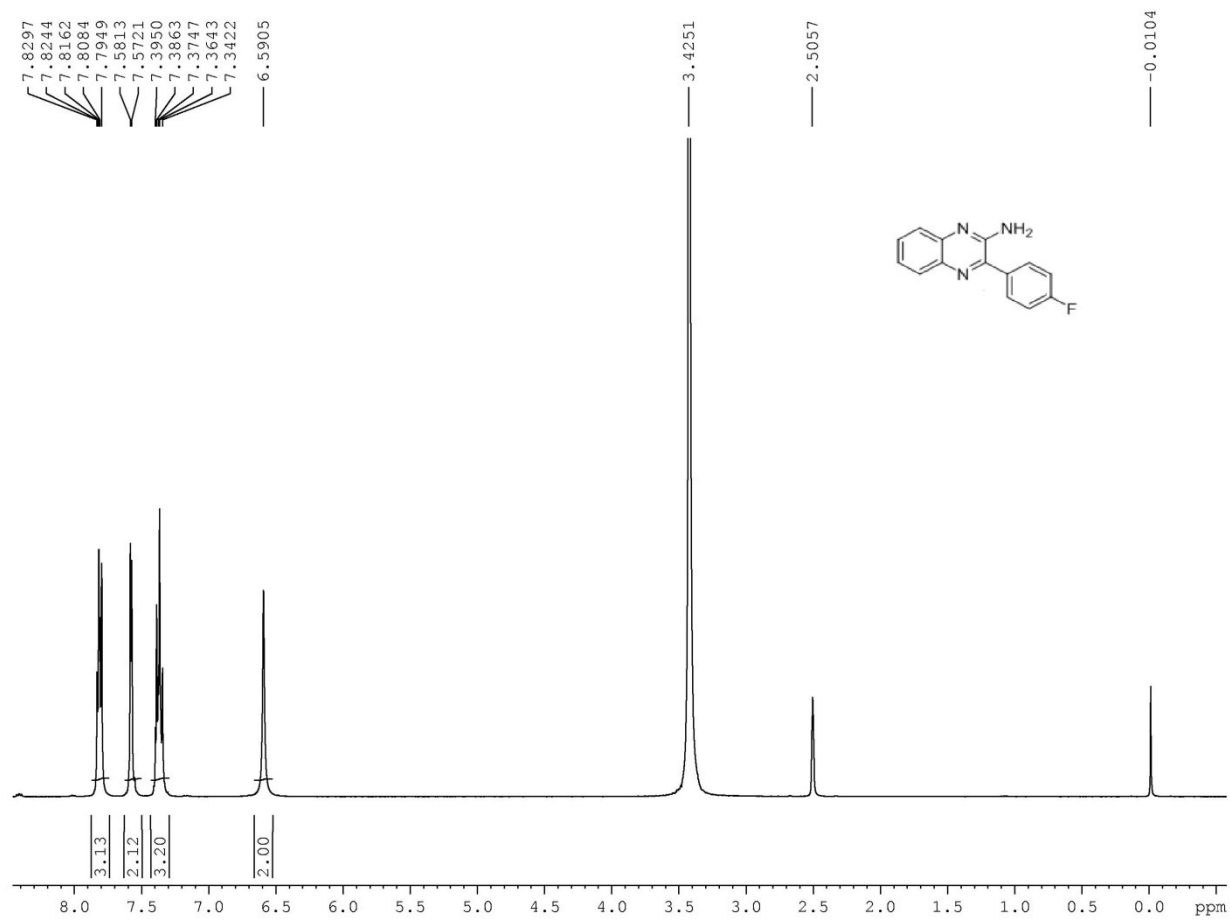





# 4d: <sup>1</sup>H NMR

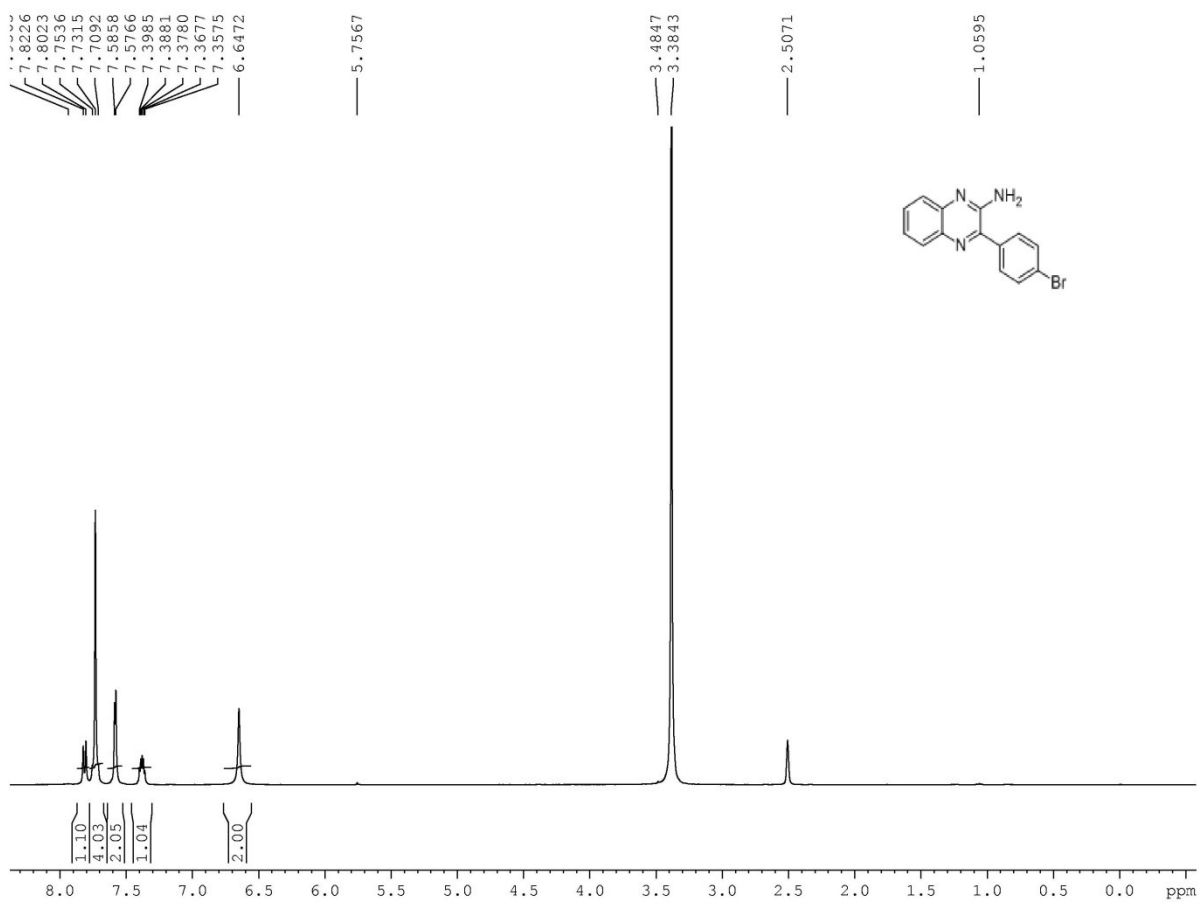

4d: <sup>13</sup>C NMR

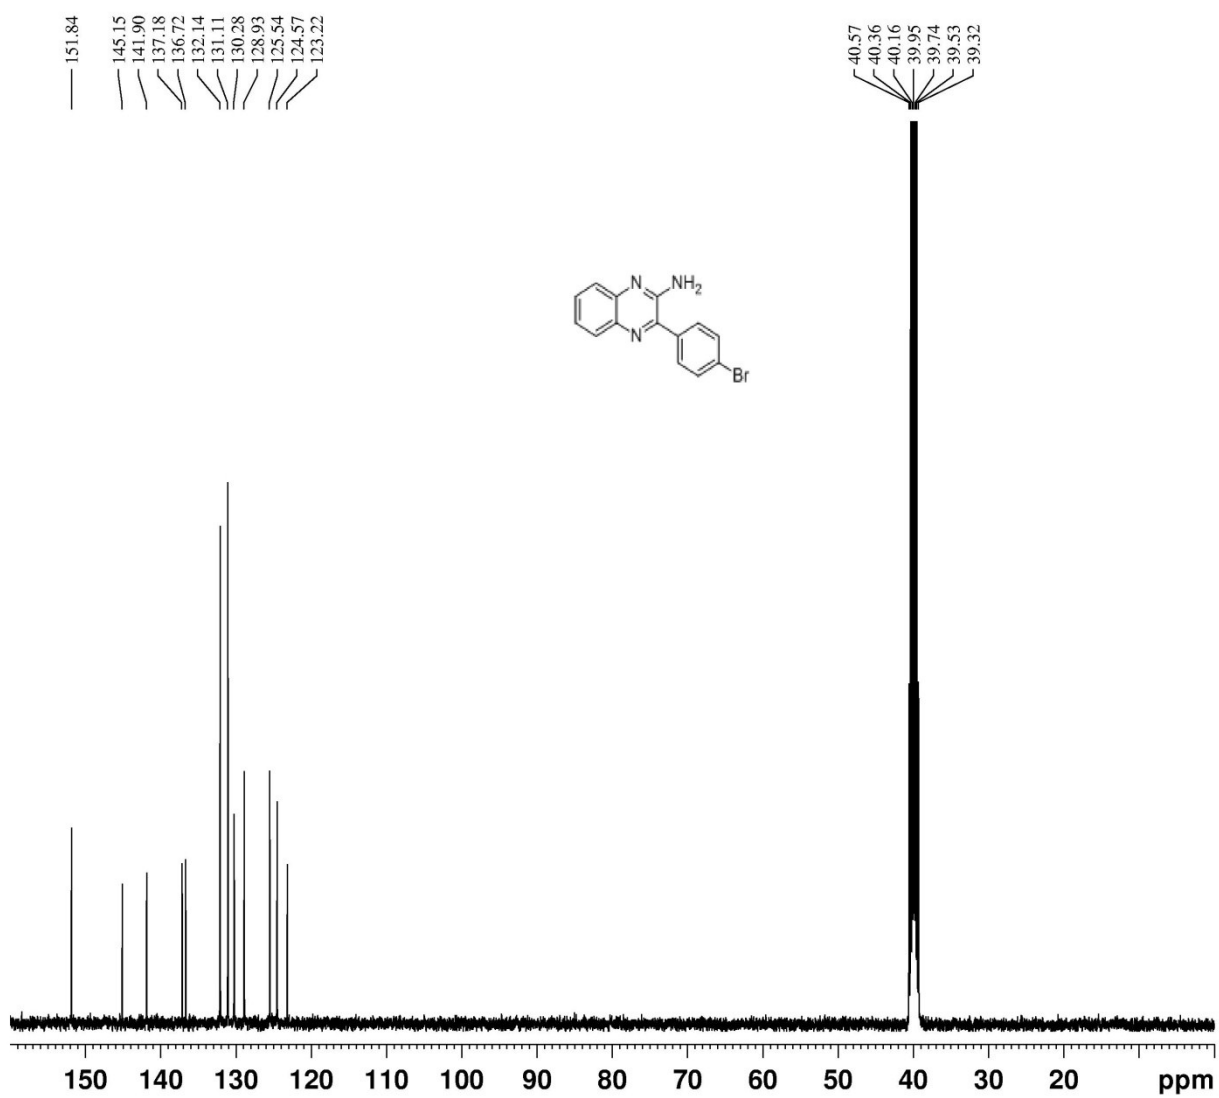

# 4e: <sup>1</sup>H NMR

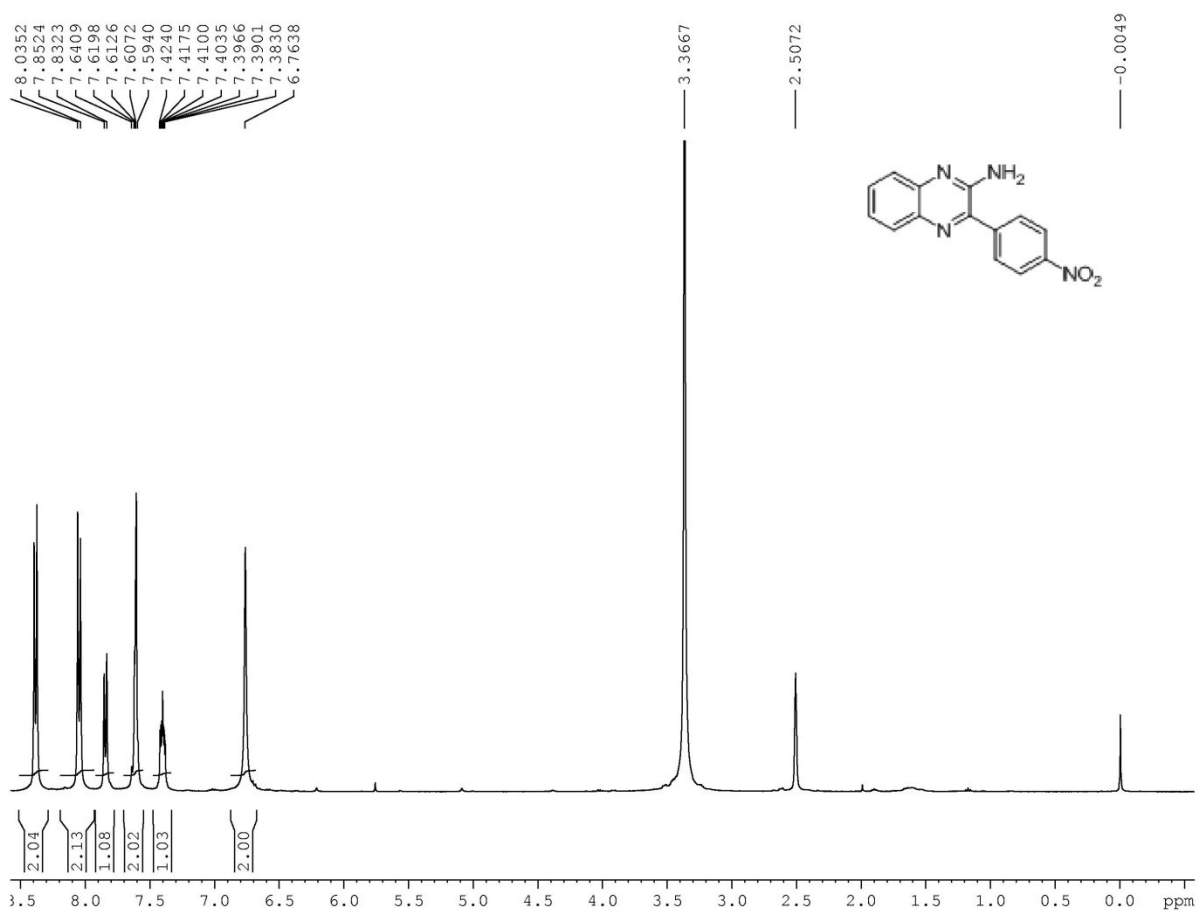

4e:  $^{13}\text{C}$  NMR

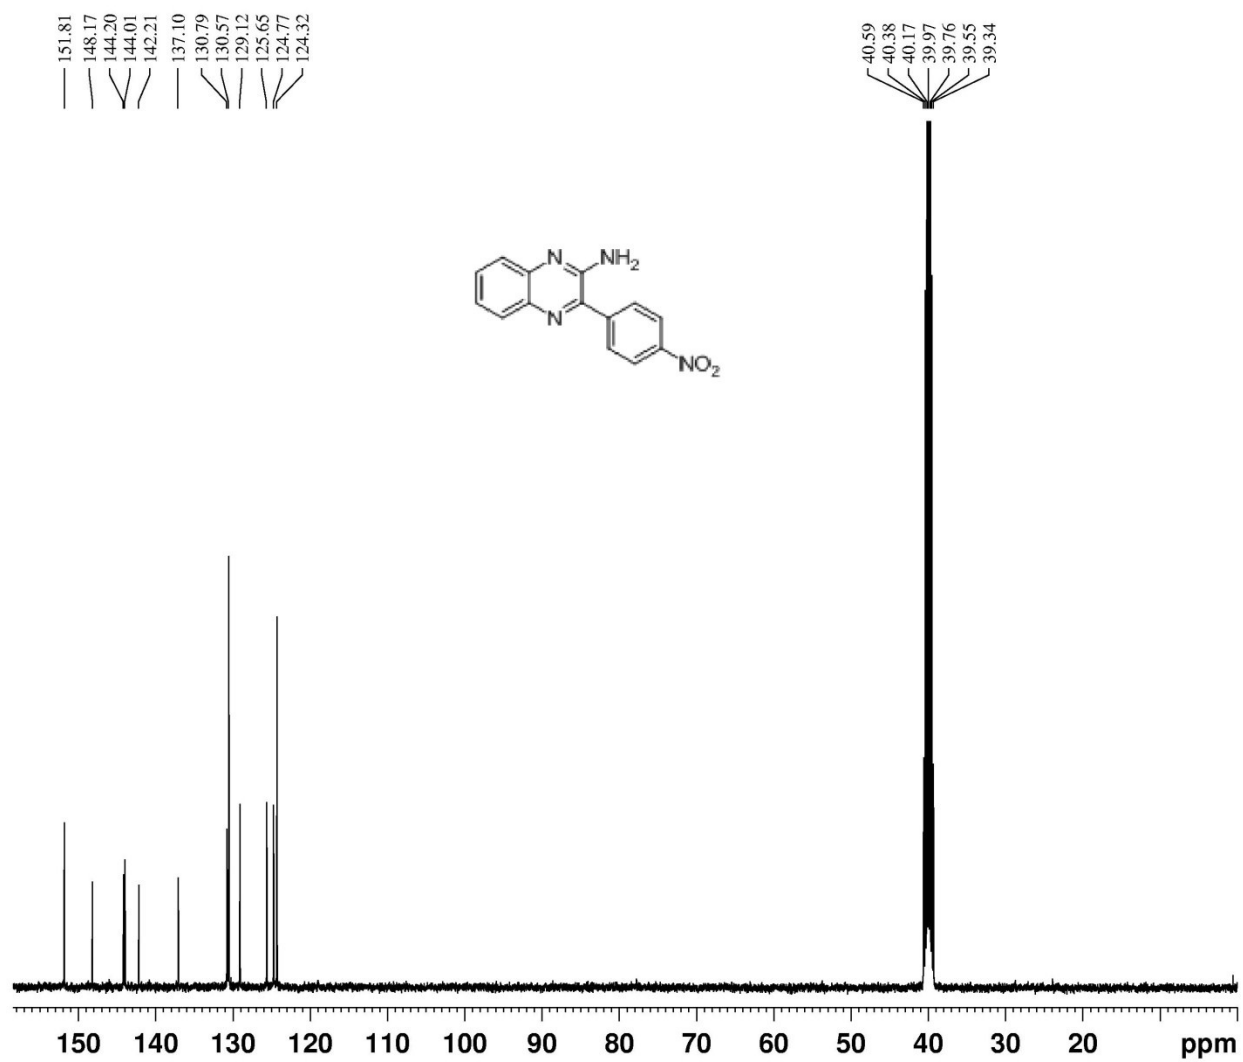

# 4f: <sup>1</sup>H NMR

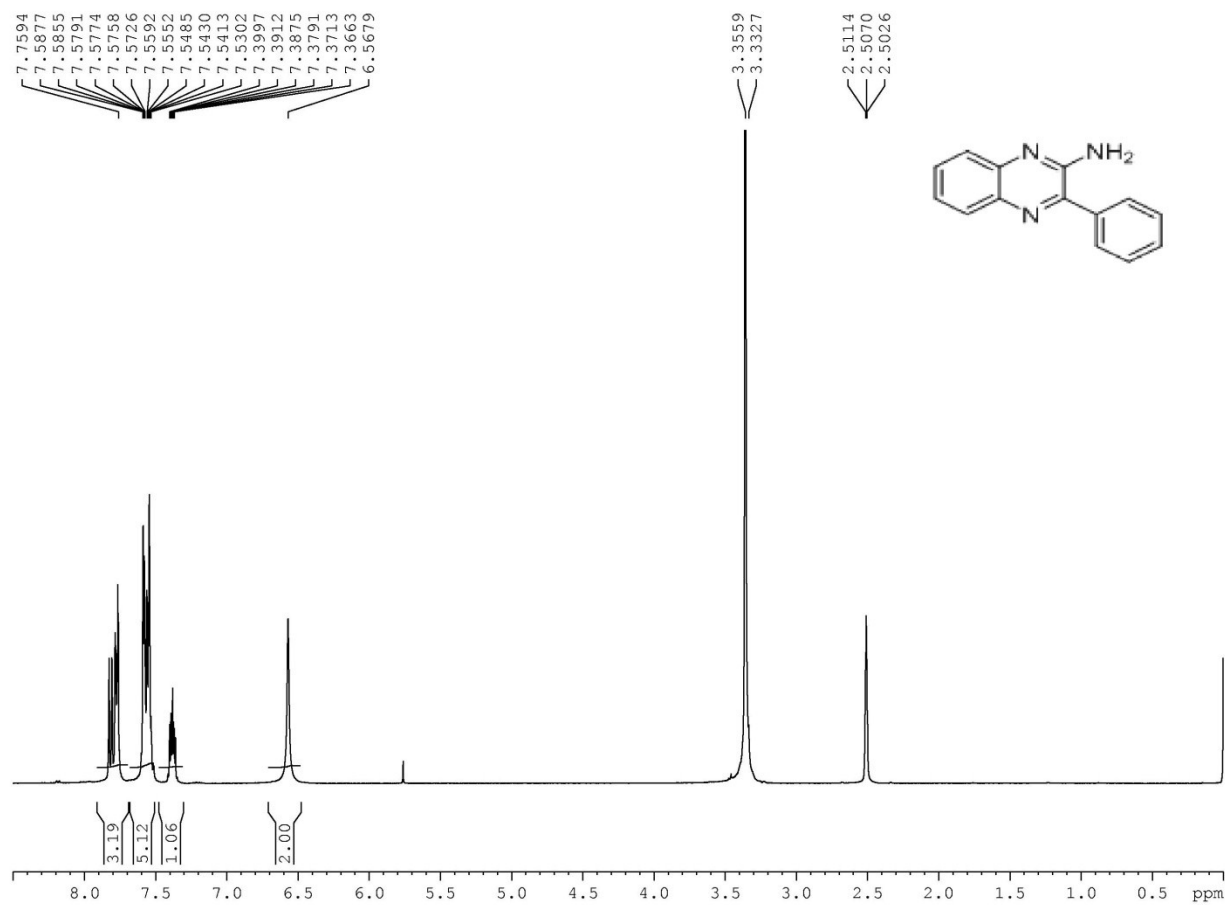

4f: <sup>13</sup>C NMR

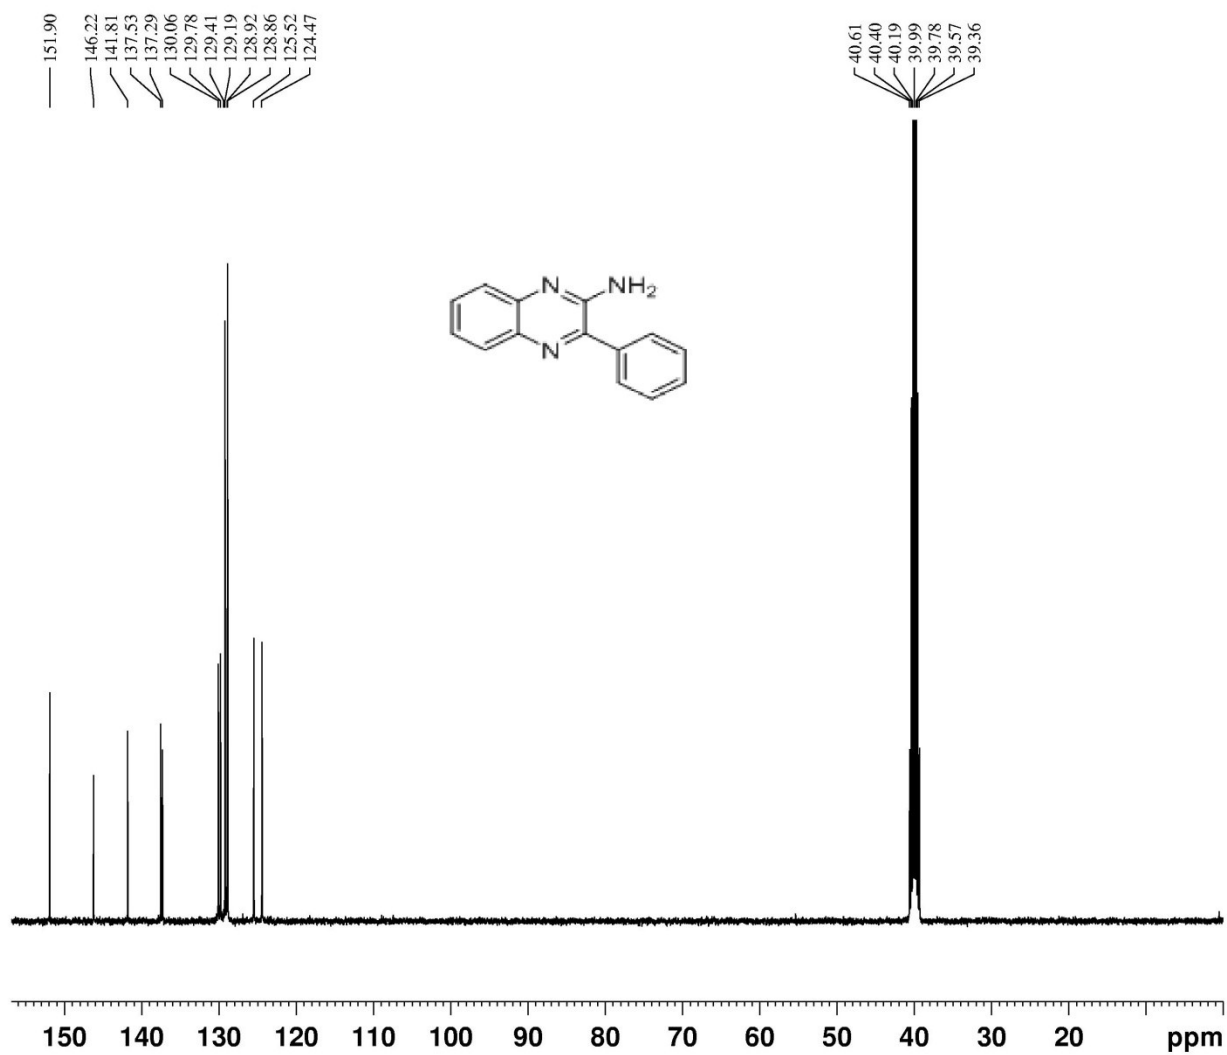

# 4g: <sup>1</sup>H NMR

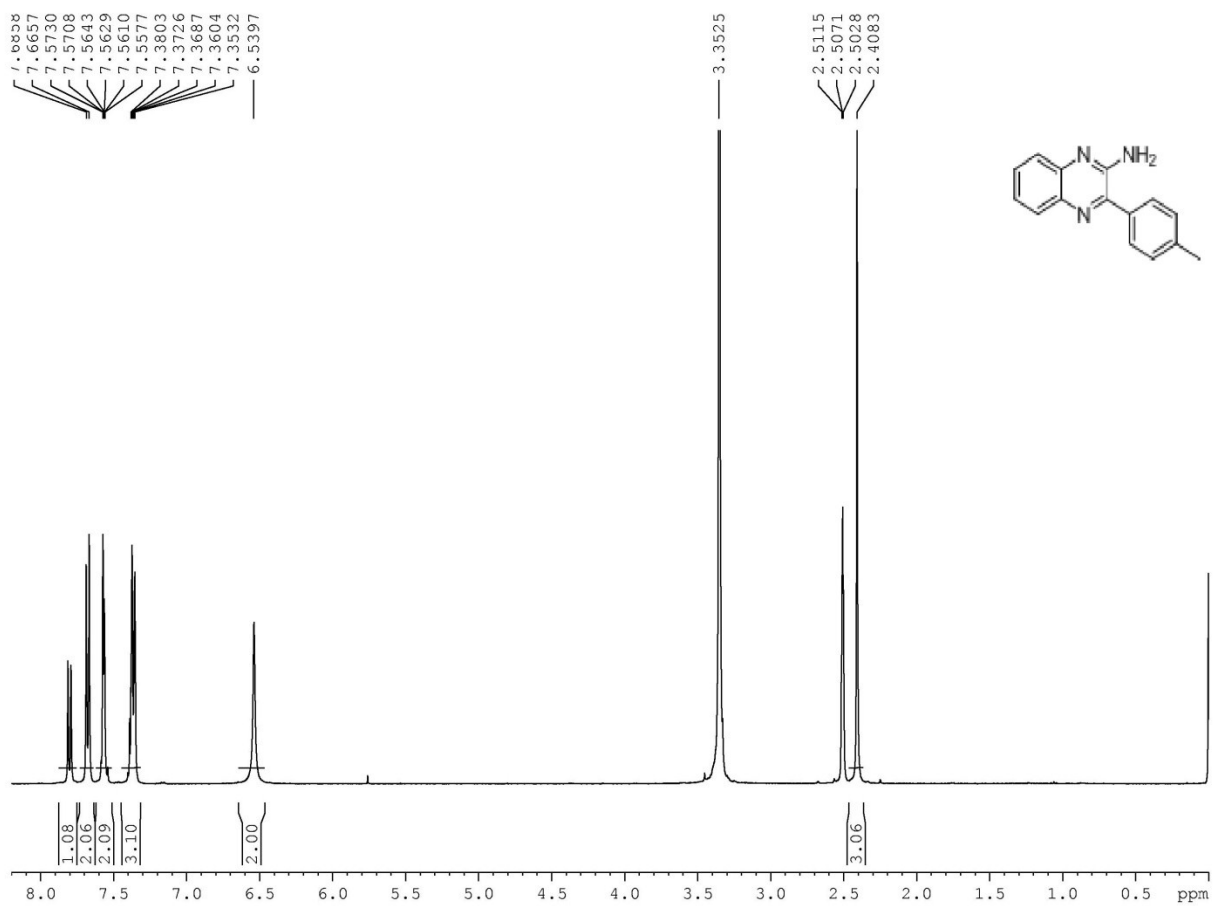



4g:  $^{13}\text{C}$  NMR

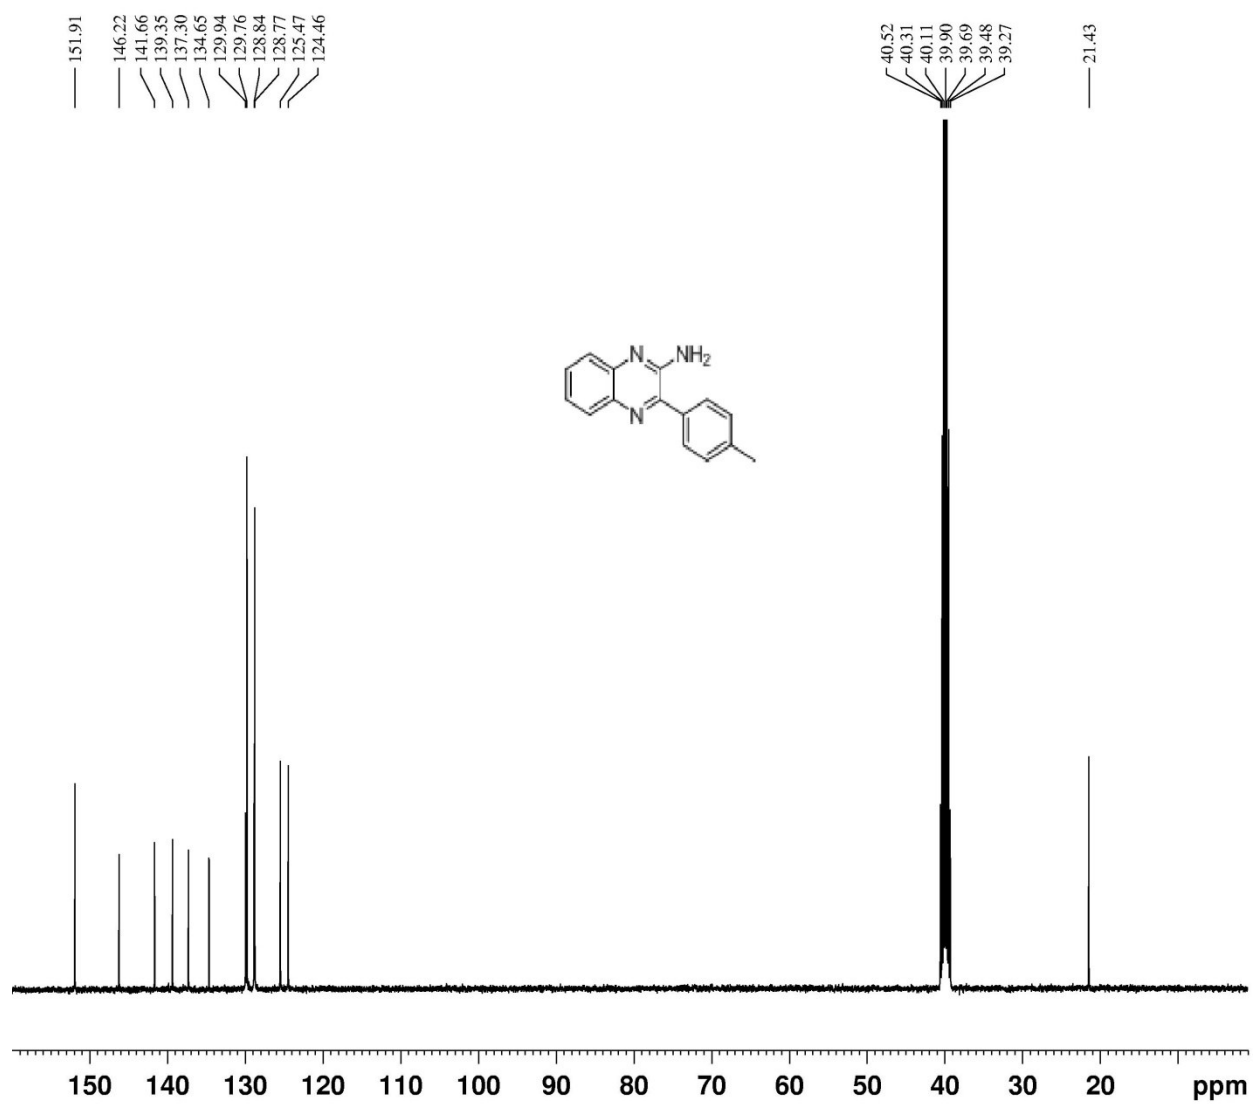

# 4h: <sup>1</sup>H NMR

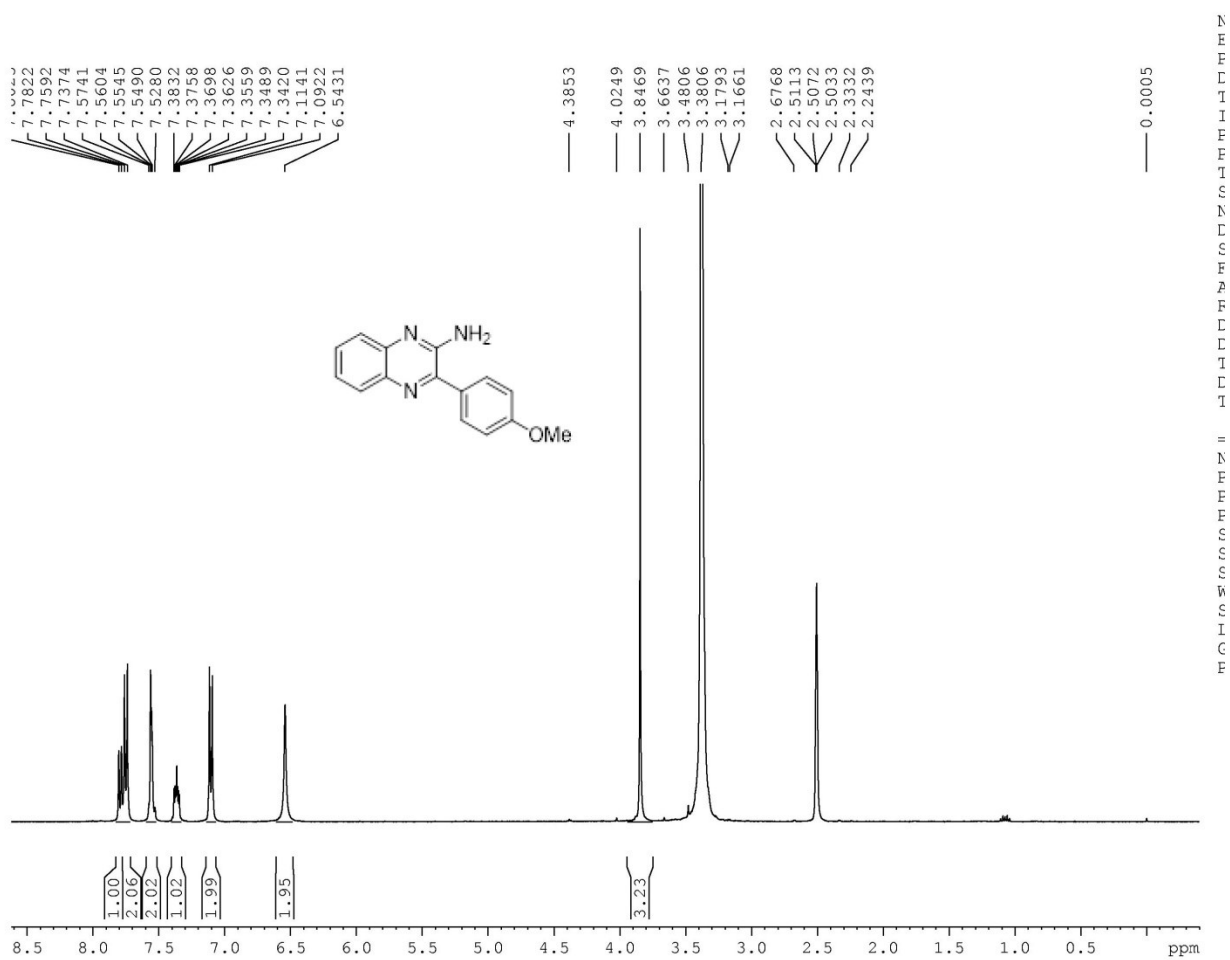

4h: <sup>13</sup>C NMR

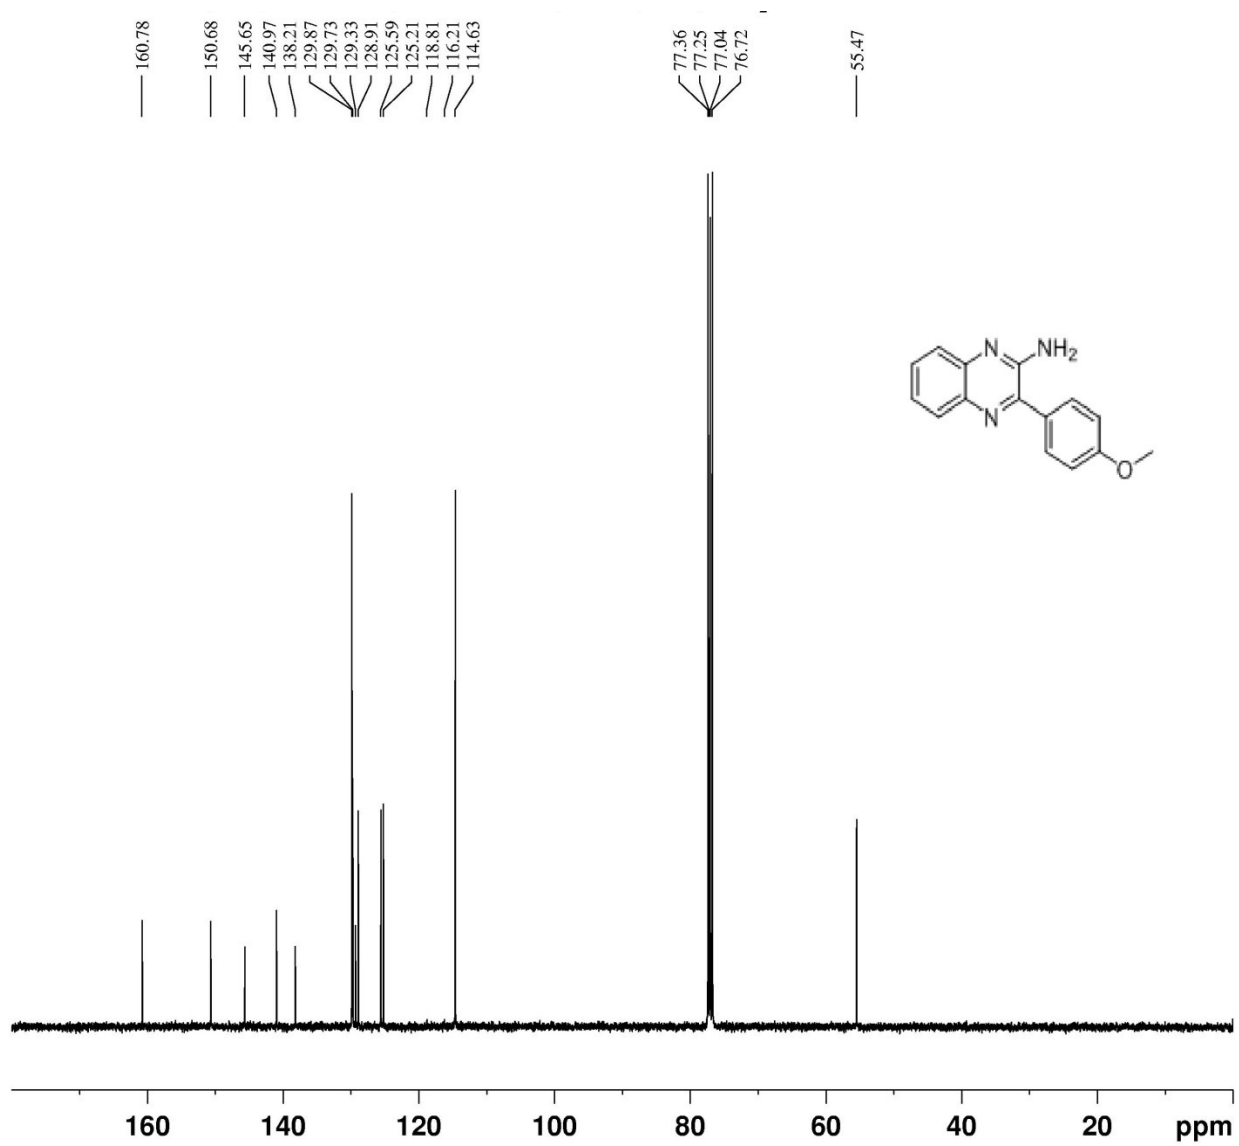

# 4i: <sup>1</sup>H NMR

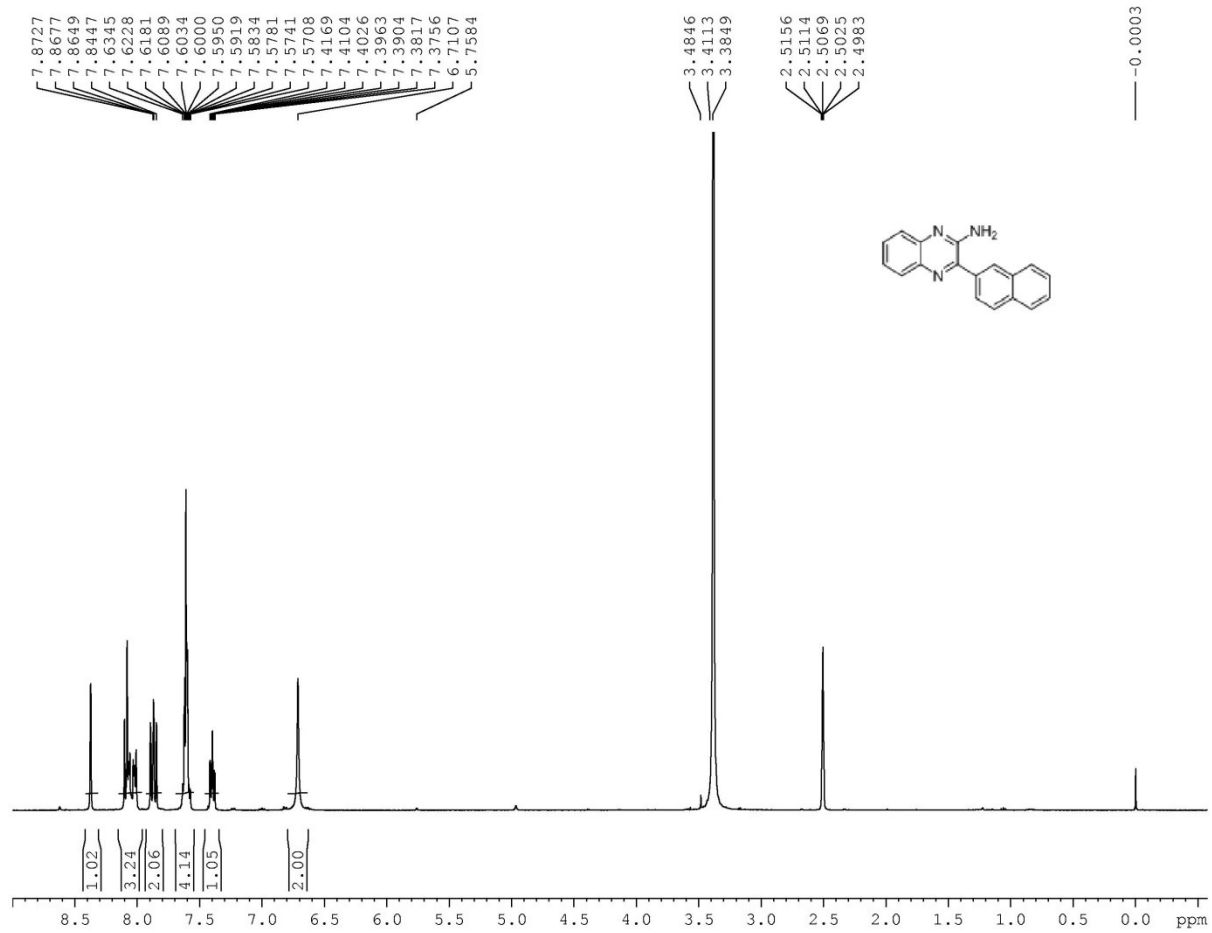

# 4i: <sup>13</sup>C NMR

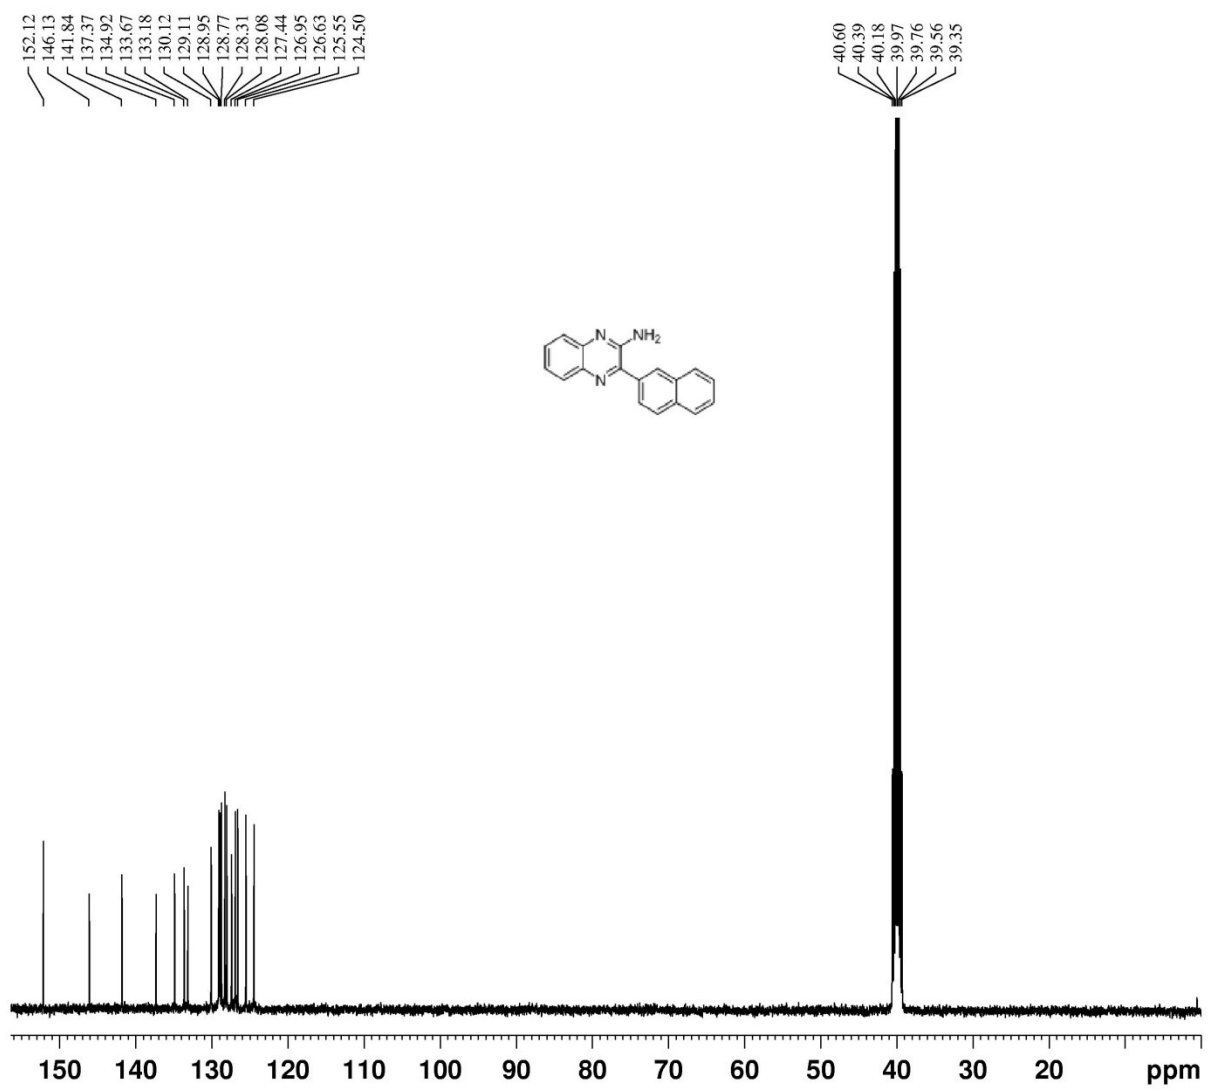

# 4j: <sup>1</sup>H NMR

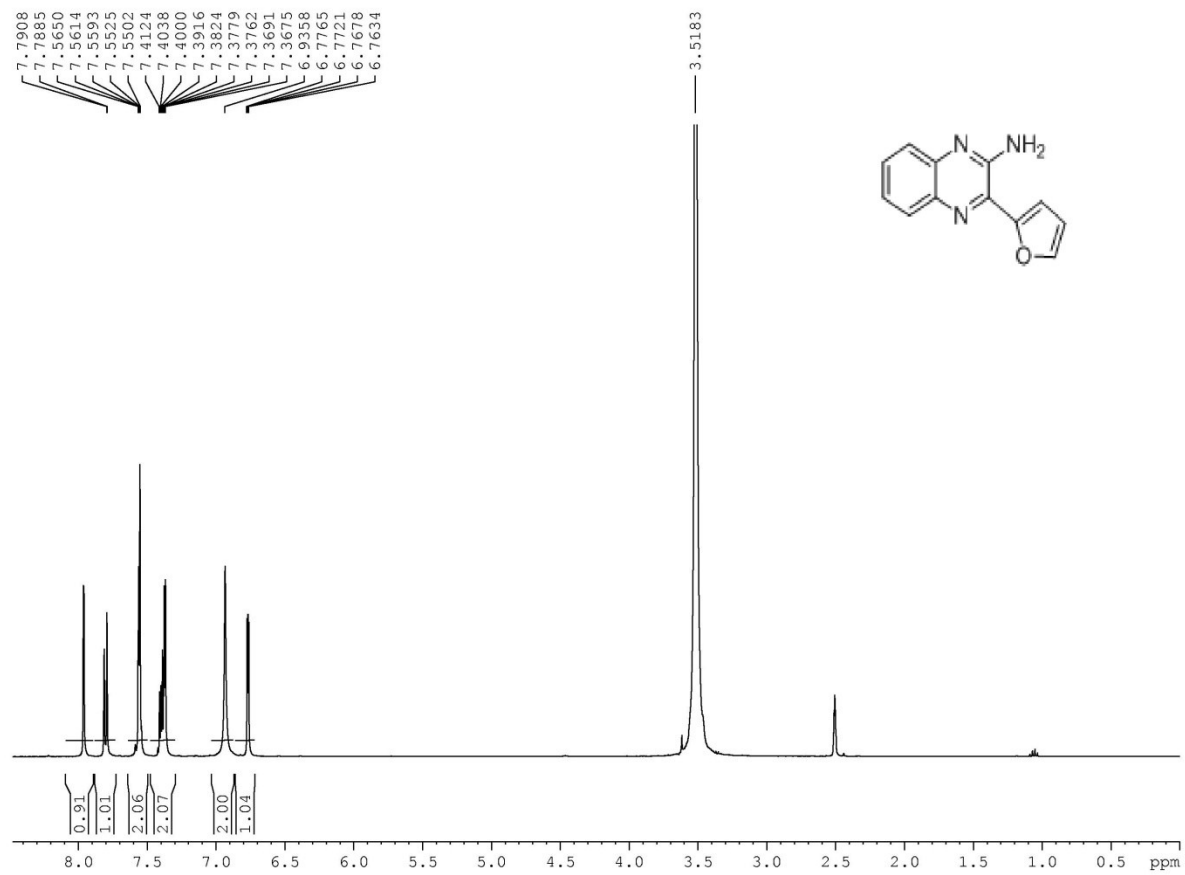

### 4j: <sup>13</sup>C NMR

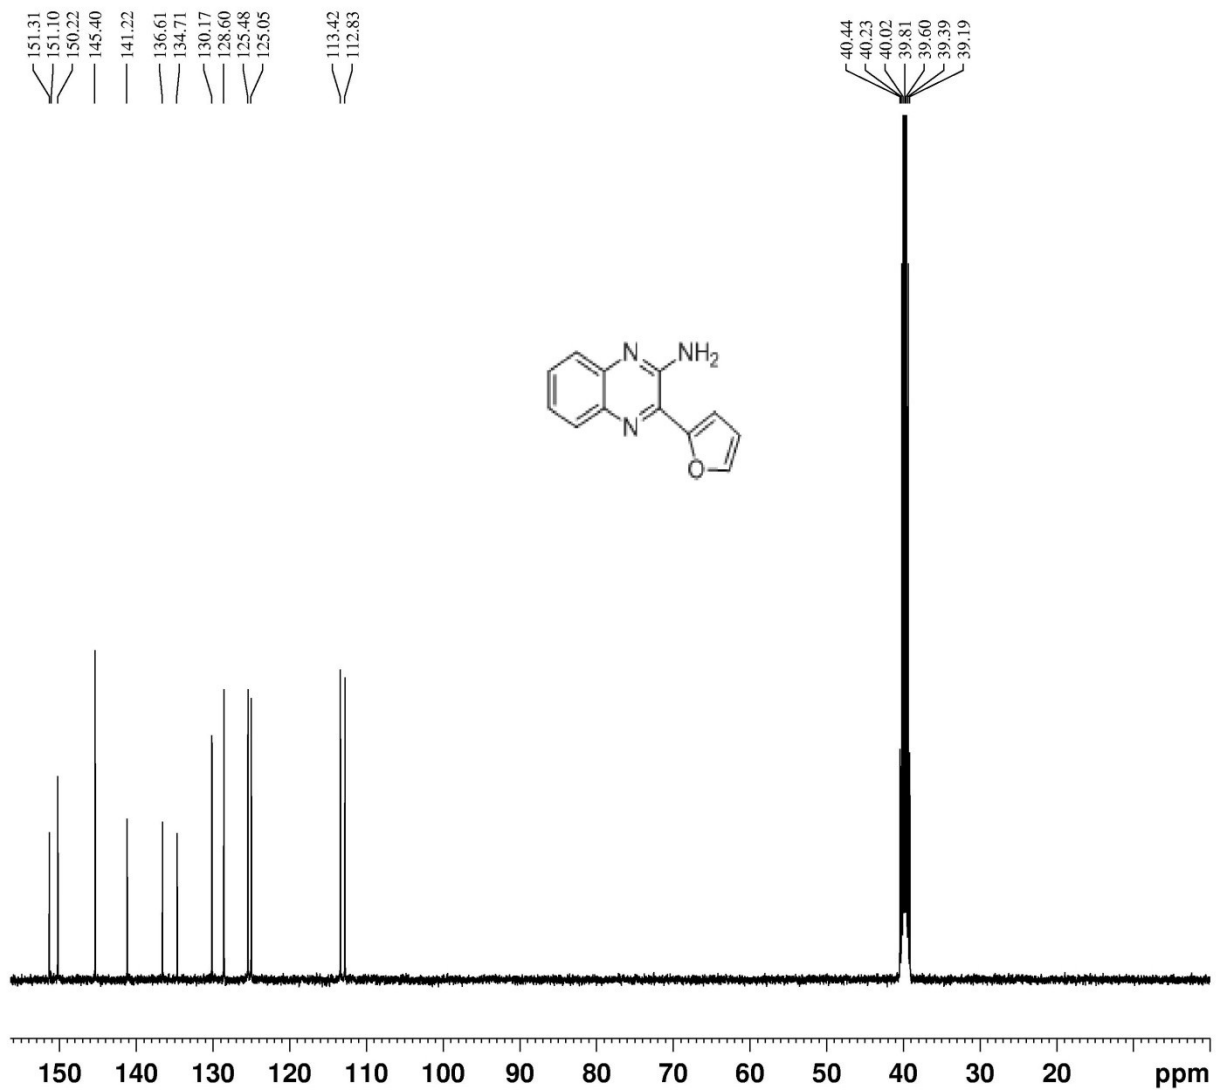

# 4k: <sup>1</sup>H NMR

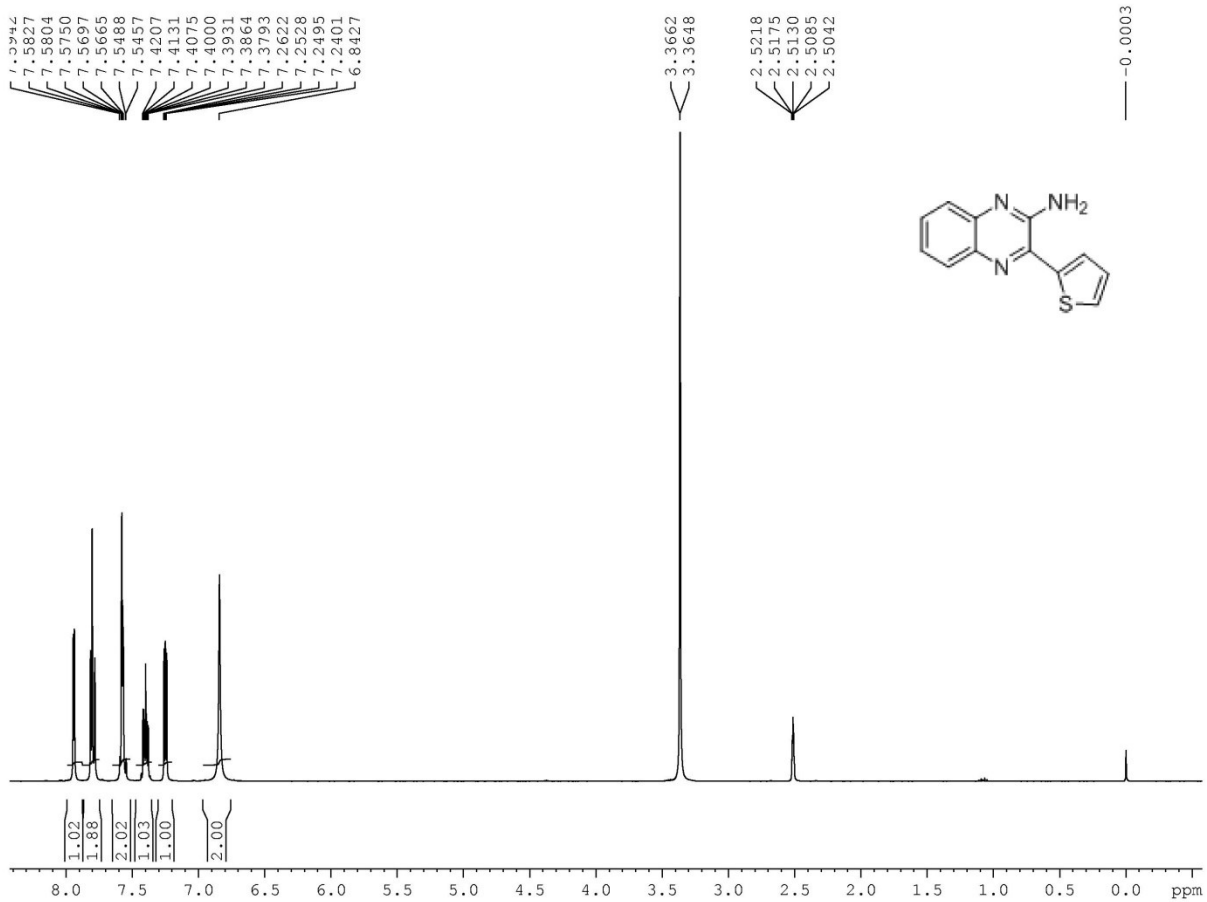



4k: <sup>13</sup>C NMR

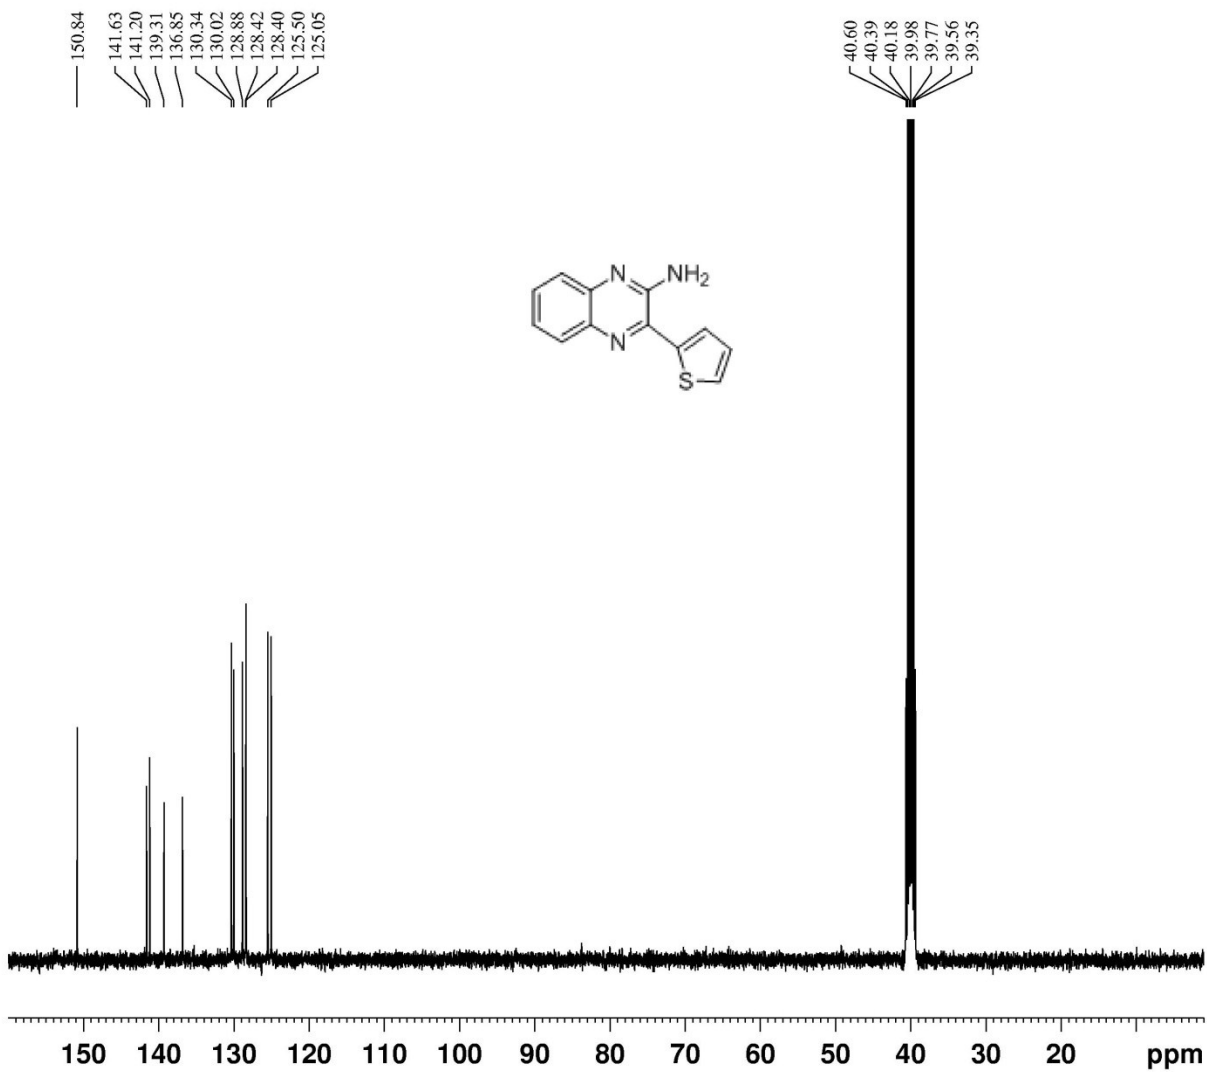

# 4l: <sup>1</sup>H NMR

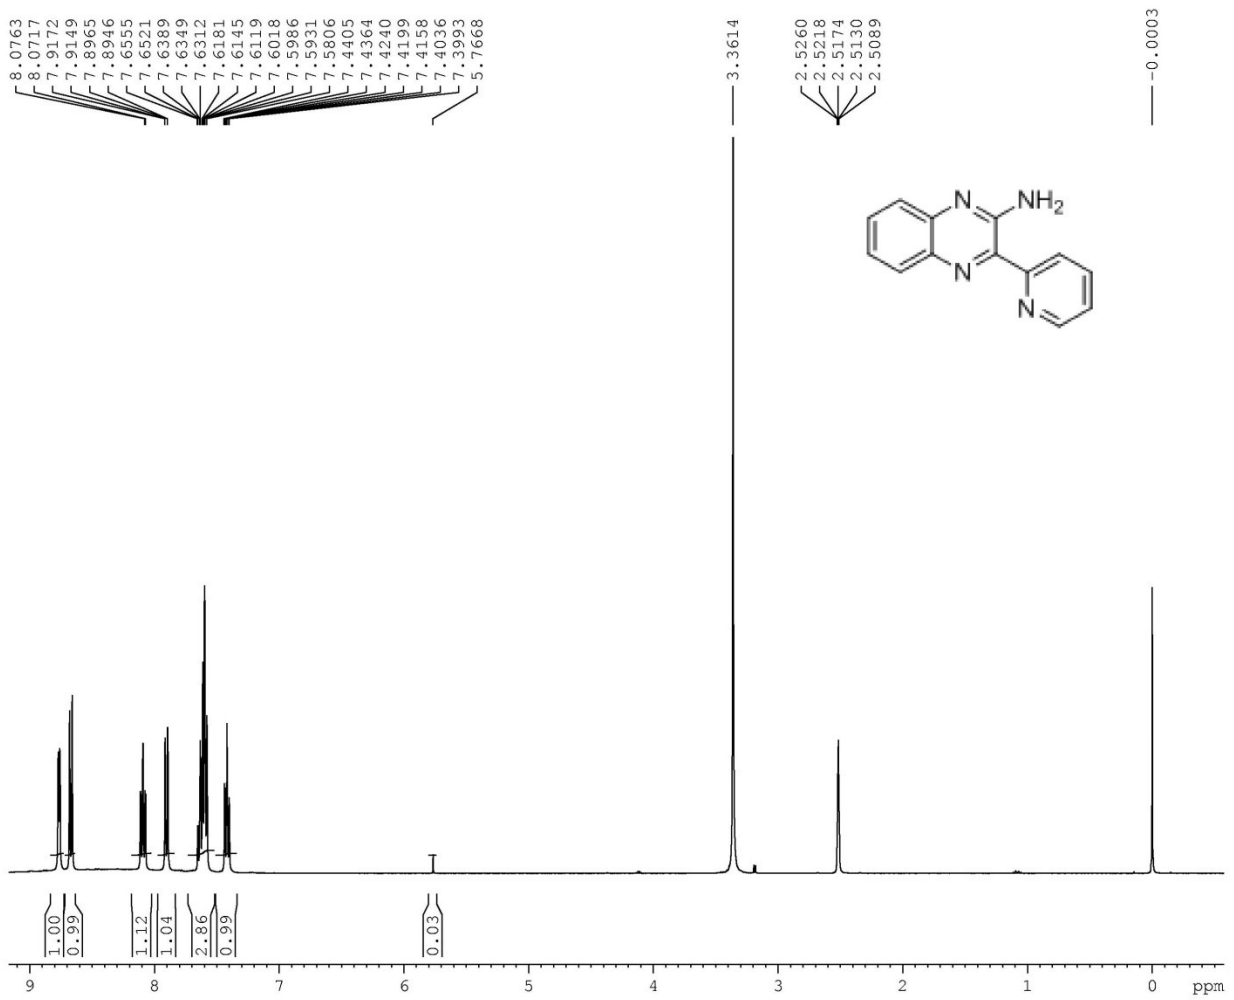

# 4i: <sup>13</sup>C NMR

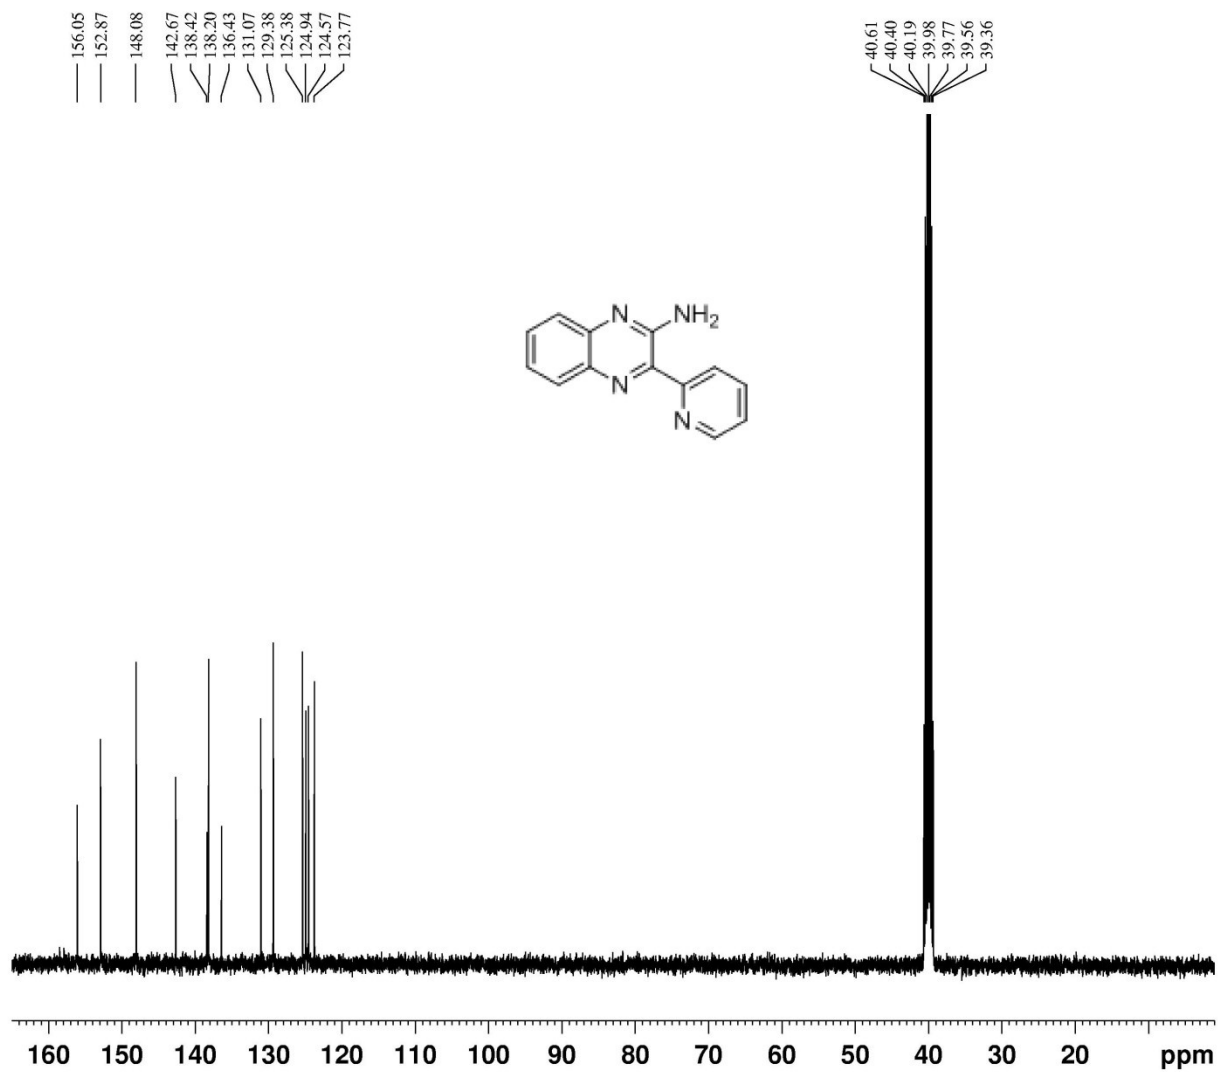

# 4m: <sup>1</sup>H NMR

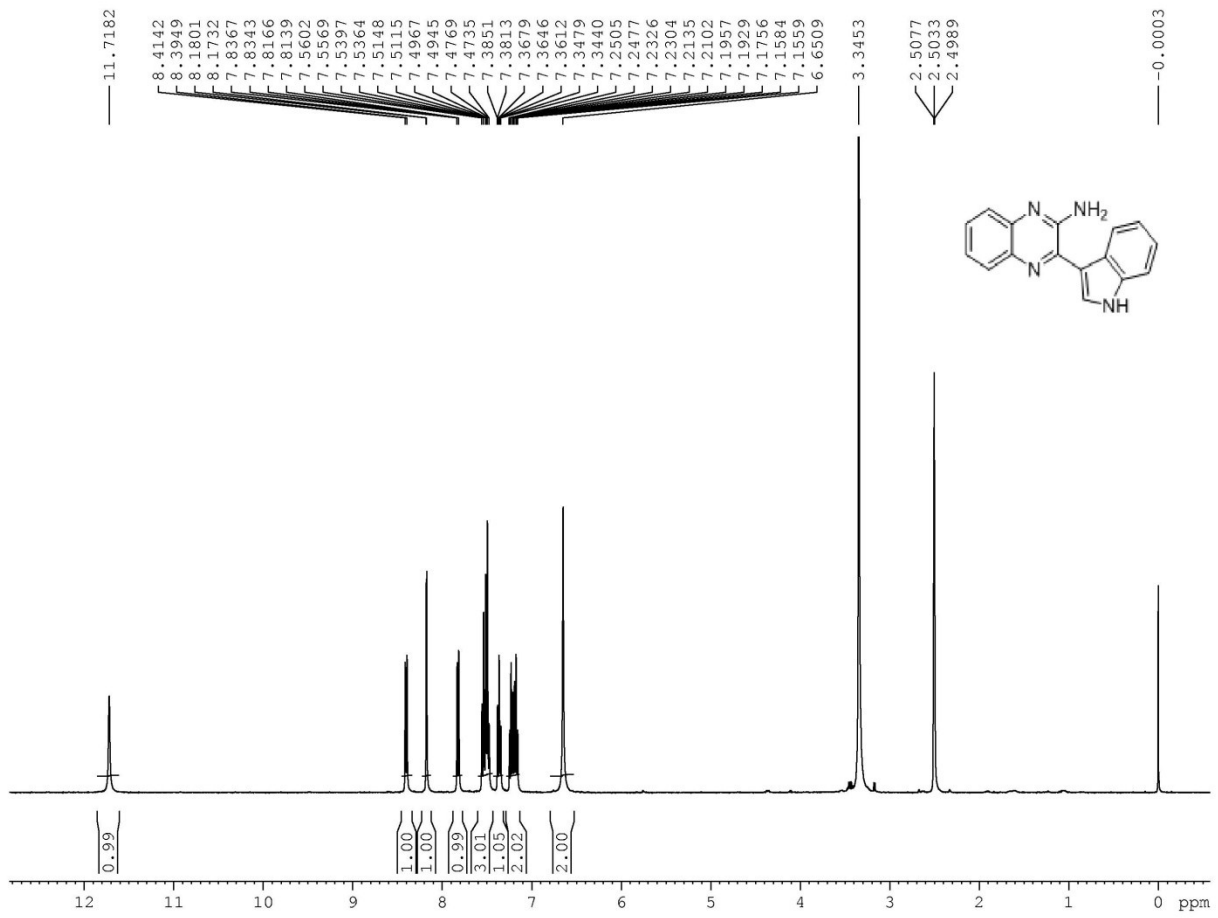

### 4m: <sup>13</sup>C NMR

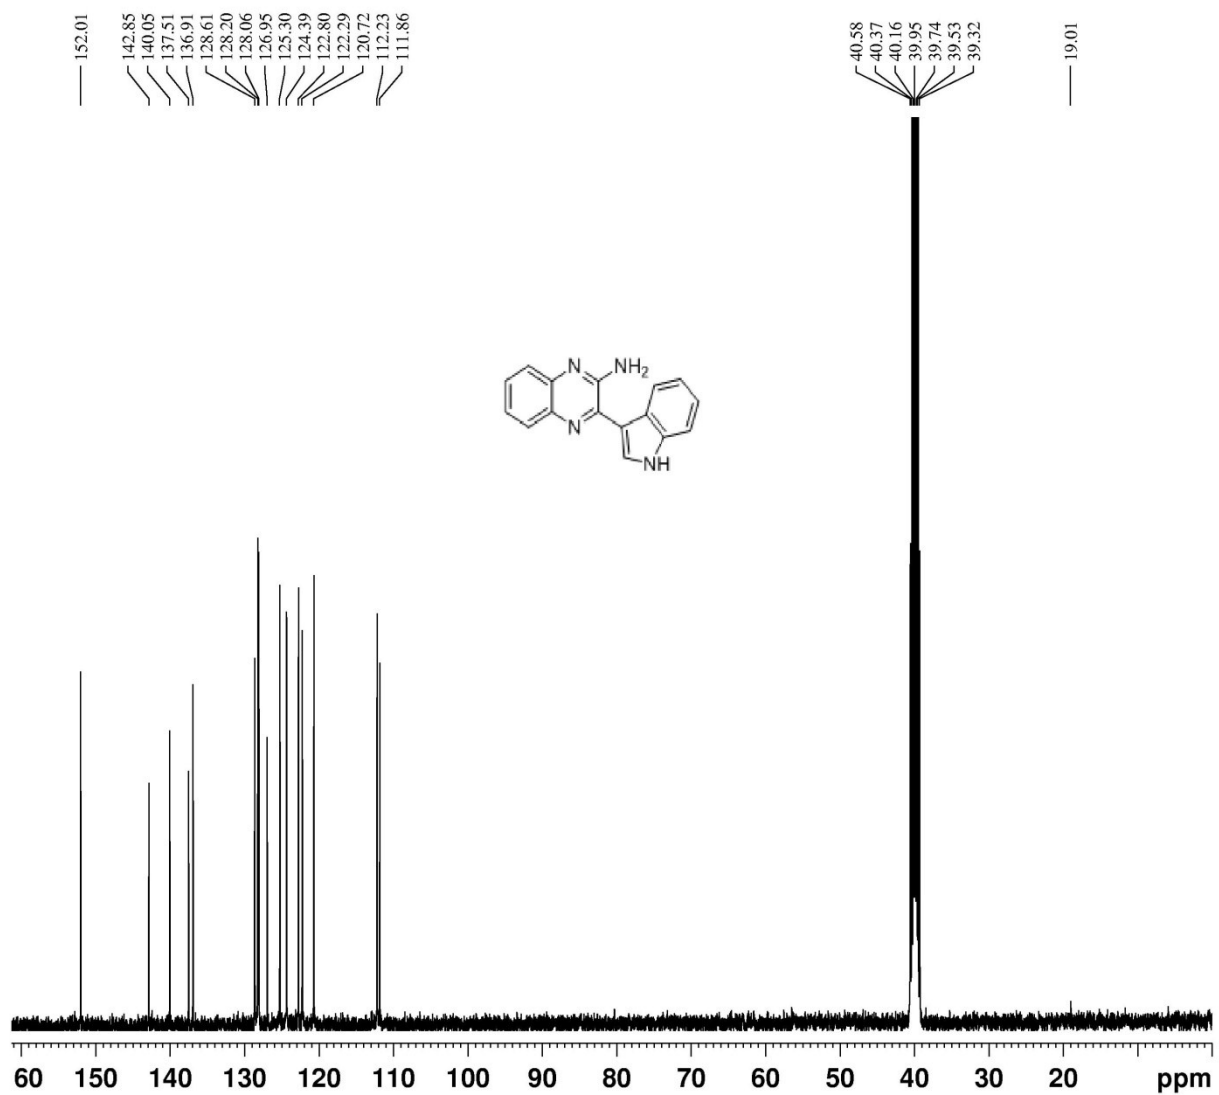

### 4n: <sup>1</sup>H NMR

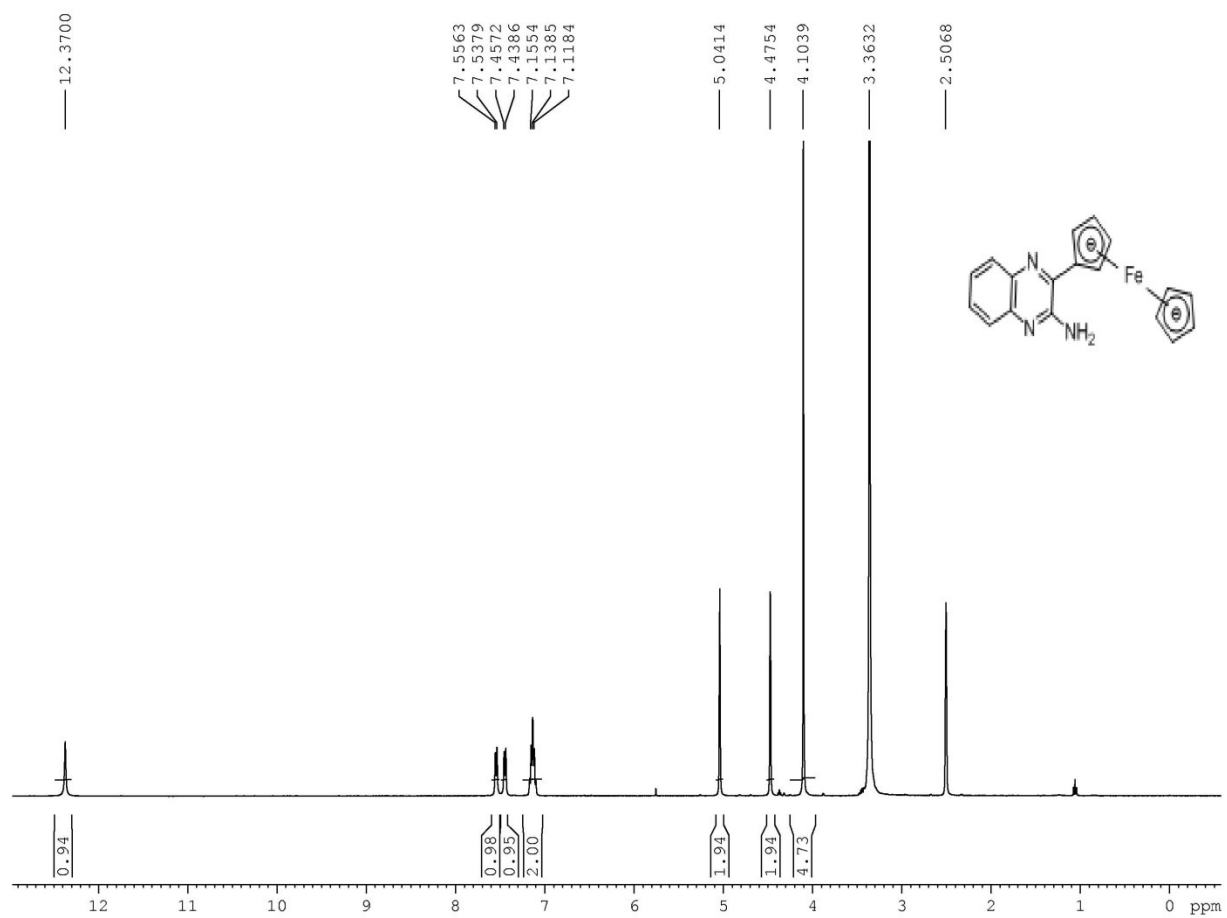

**4n: <sup>13</sup>C NMR**

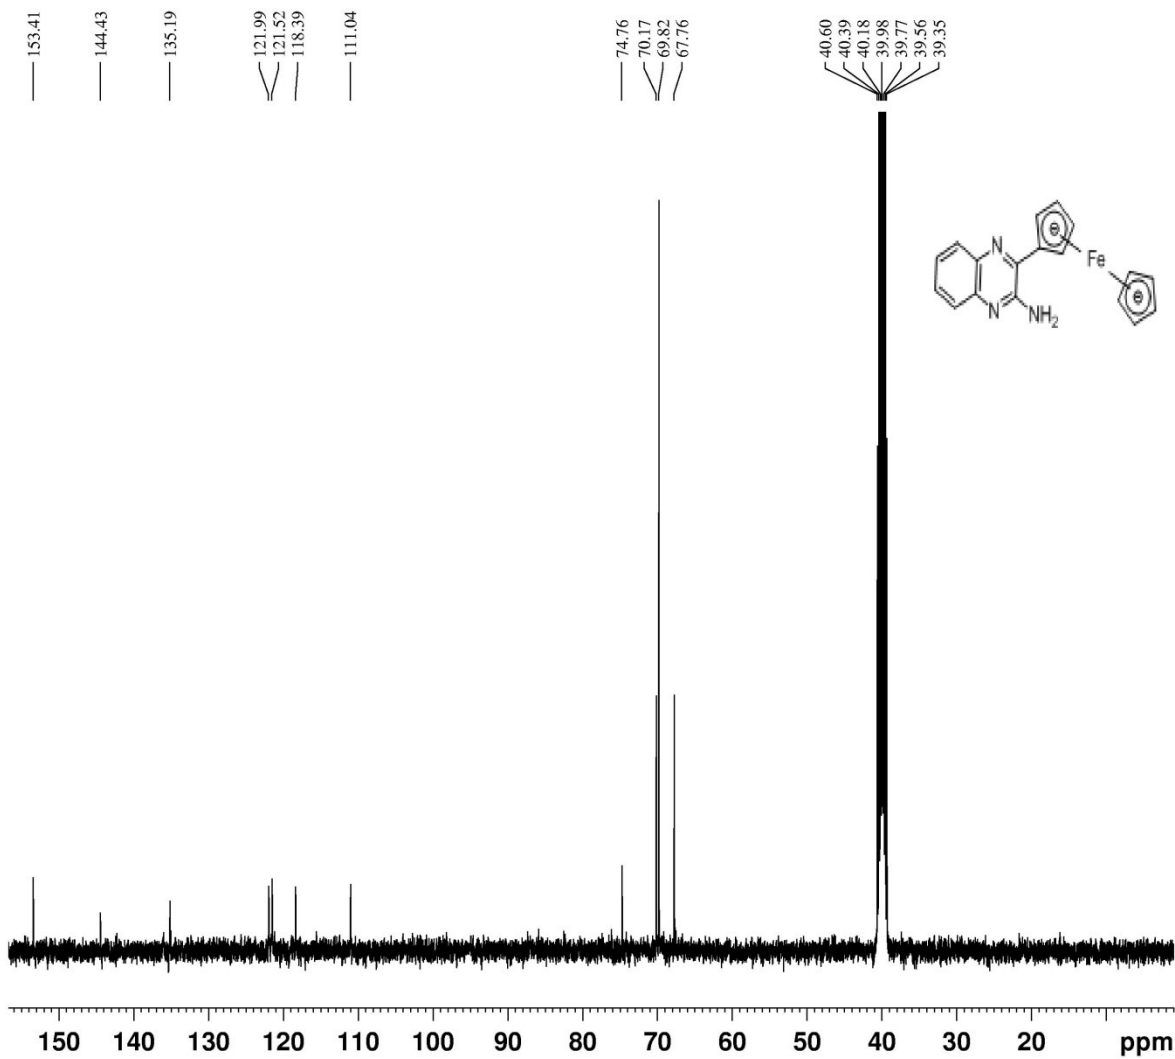

# 4o: <sup>1</sup>H NMR

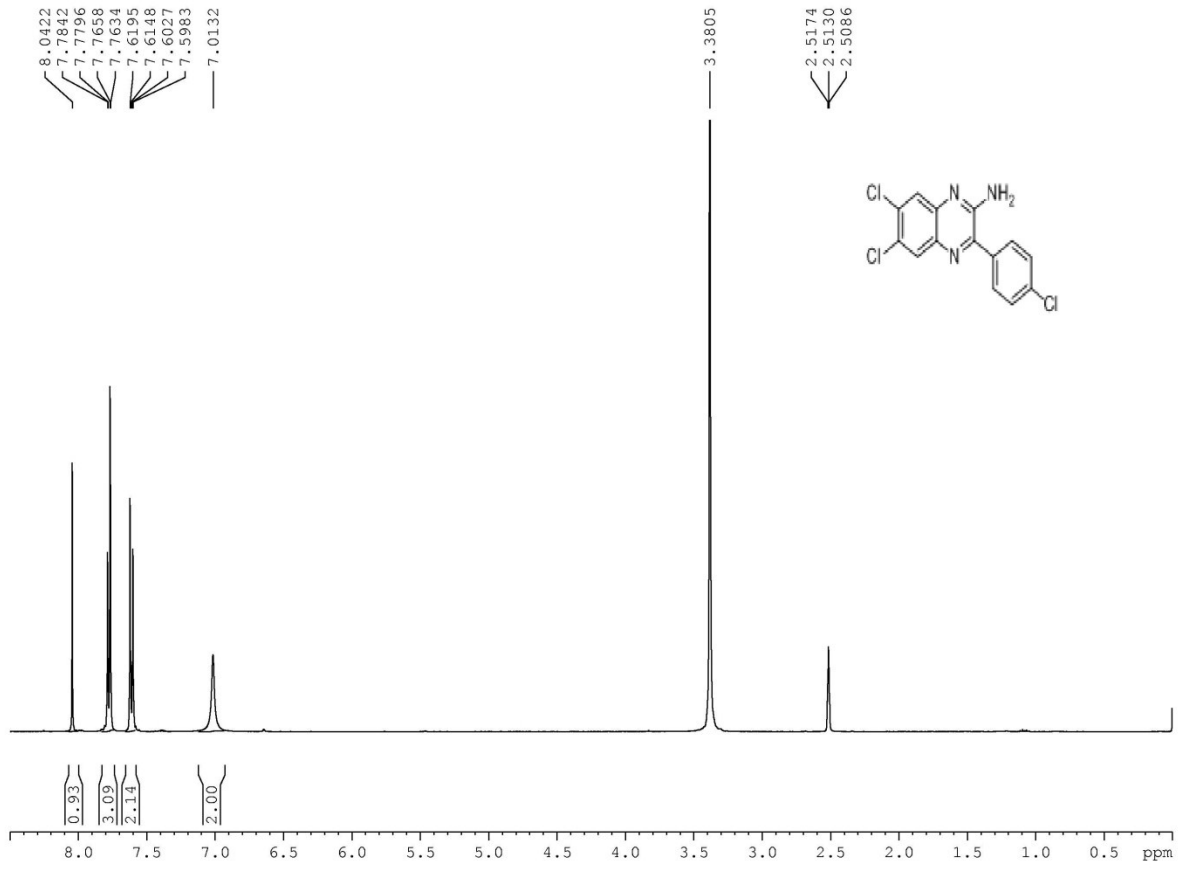



4o: <sup>13</sup>C NMR

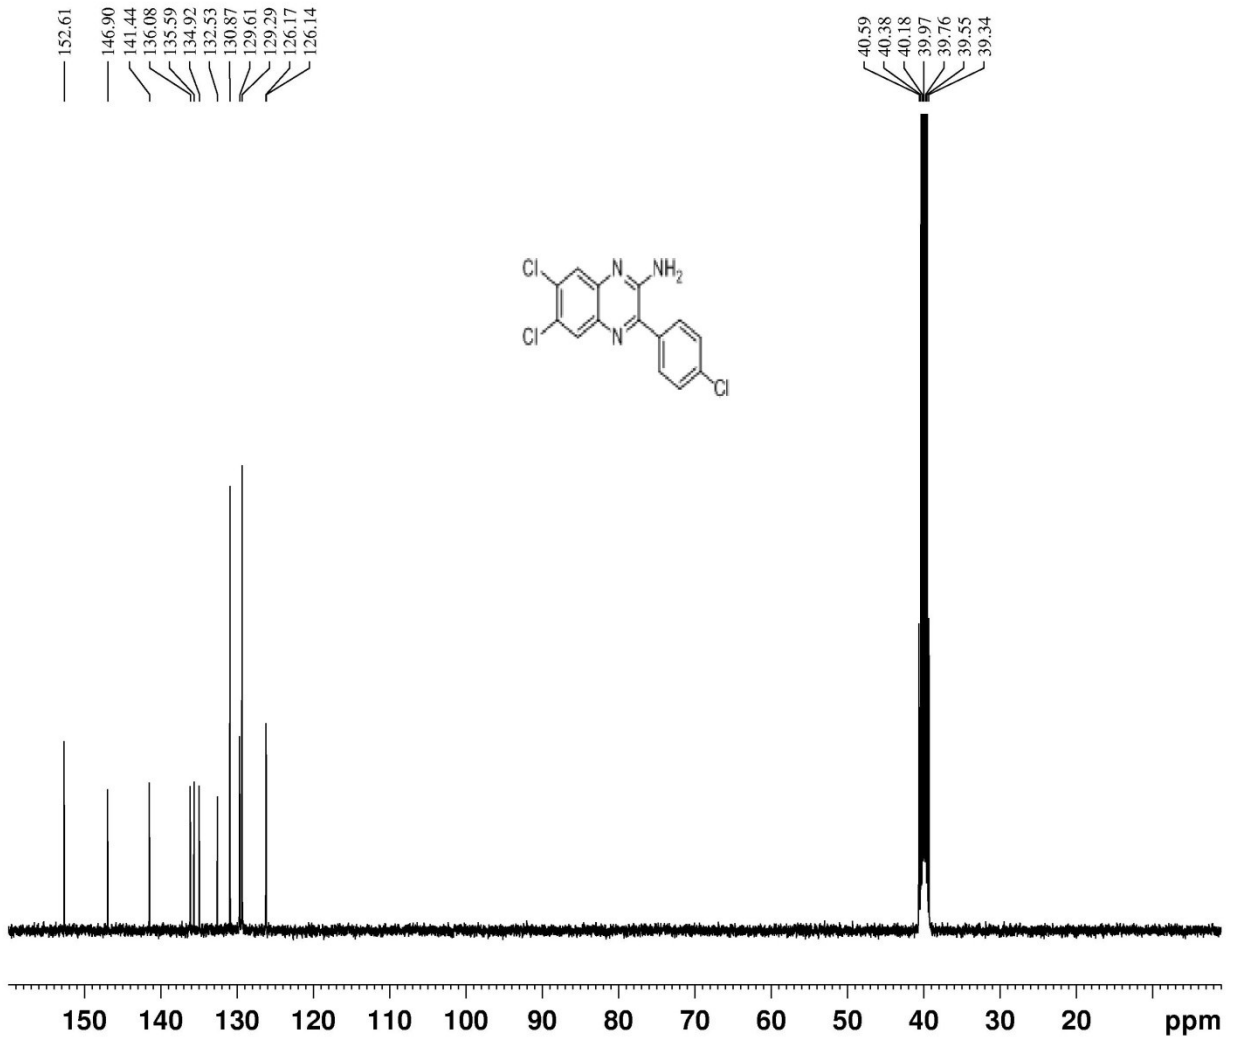

# 4p: <sup>1</sup>H NMR

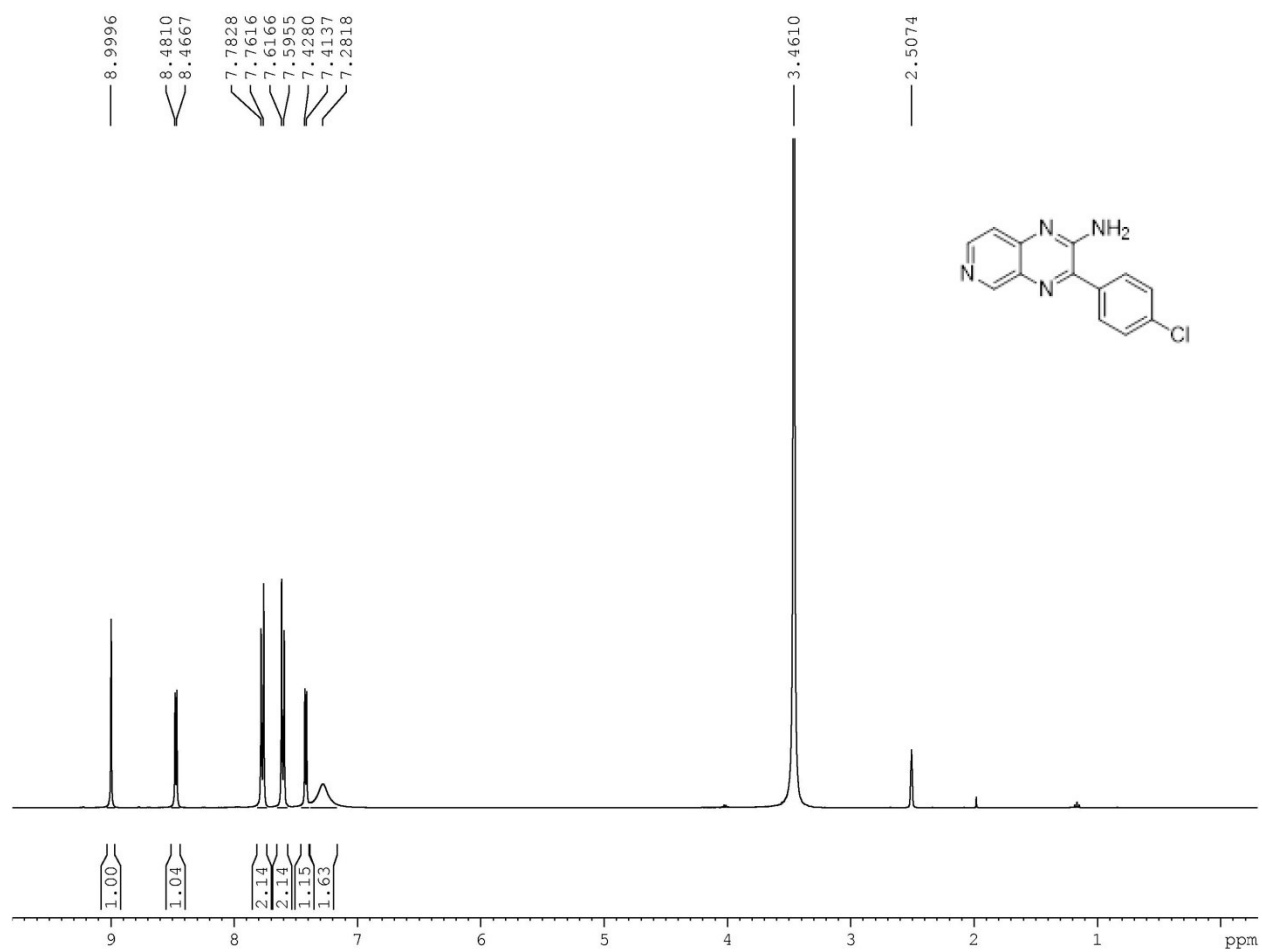

4p: <sup>13</sup>C NMR

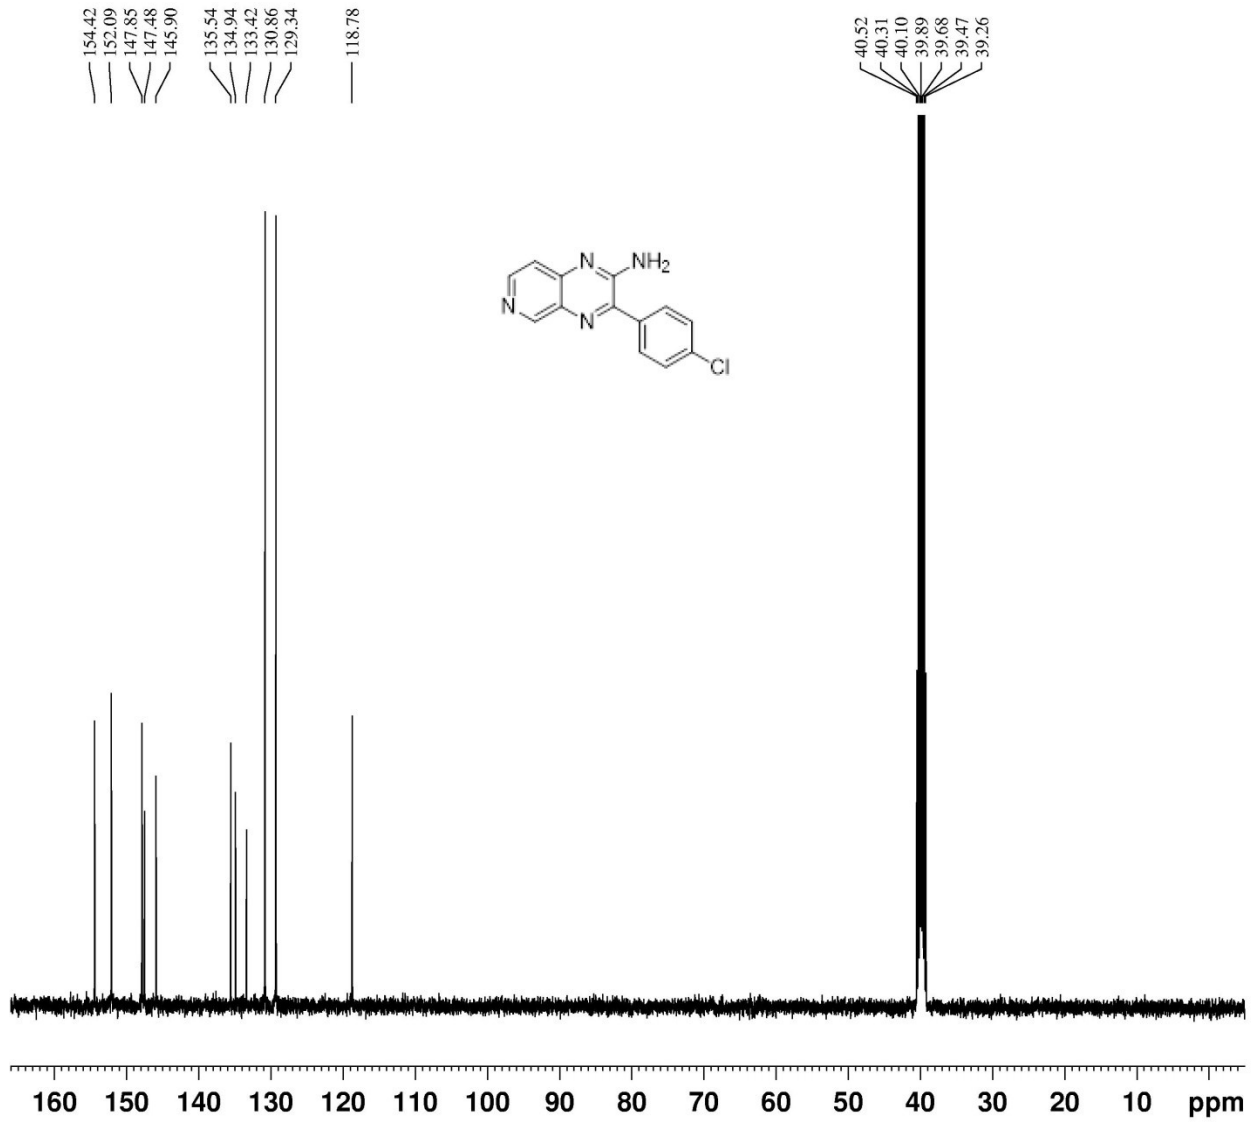

Supplement: c6ra12028h1.pdf [file c6ra12028h1.pdf]
